# Supplementary material for: Theoretical insights into unraveling the mechanism, selectivity patterns, and ligand effects in gold(i)-catalyzed annulations between ynamides and isoxazoles
Source: Royal Society of Chemistry journal article supplement (doi:10.1039/d3qo01792c), 2023-12-05
Supplement: d3qo01792c1.pdf [file d3qo01792c1.pdf]

## *Supporting Information*

### **Theoretical Insights into Unraveling the Mechanism, Selectivity Patterns, and Ligand Effects in Gold(I)-Catalyzed Annulations between Ynamides and Isoxazoles**

Qing Sun,<sup>\*a</sup> Jia-Jie Chen,<sup>a</sup> Jia-Yi Liu,<sup>a</sup> Wen-Qing Zhang,<sup>a</sup> Xin Lu,<sup>d</sup> Jin-Heng Li<sup>\*a,b,c</sup> and Ren-Jie Song<sup>\*a</sup>

<sup>a</sup> Key Laboratory of Jiangxi Province for Persistent Pollutants Control and Resources Recycle, Nanchang Hangkong University, Nanchang 330063, China.

<sup>b</sup> State Key Laboratory of Applied Organic Chemistry, Lanzhou University, Lanzhou 730000, China.

<sup>c</sup> School of Chemistry and Chemical Engineering, Henan Normal University, Xinxiang 475004, China.

<sup>d</sup> State Key Laboratory of Physical Chemistry of Solid Surface & Fujian Provincial Key Laboratory for Theoretical and Computational Chemistry, Department of Chemistry, College of Chemistry and Chemical Engineering, Xiamen University, Xiamen 361005, China.

*\*Correspondence:* [sunqing@nchu.edu.cn](mailto:sunqing@nchu.edu.cn); [jhli@hnu.edu.cn](mailto:jhli@hnu.edu.cn); [srj0731@hnu.edu.cn](mailto:srj0731@hnu.edu.cn)

**Cartesian Coordinates and Thermochemical Data (Energies in Hartree)**

**Pre**

Number of imaginary frequencies: 0

|    |             |             |             |
|----|-------------|-------------|-------------|
| C  | -4.80421100 | 2.53721500  | -3.70070500 |
| C  | -3.80612900 | 3.27966400  | -3.92027900 |
| C  | -3.35382300 | 4.65502300  | -3.84462700 |
| C  | -1.99734600 | 4.96041300  | -4.01460700 |
| C  | -4.27313200 | 5.69132100  | -3.62412100 |
| C  | -1.56633700 | 6.28007700  | -3.97235500 |
| H  | -1.29050500 | 4.14824400  | -4.18043700 |
| C  | -3.83864900 | 7.00897100  | -3.59407000 |
| H  | -5.32668600 | 5.45067700  | -3.49385500 |
| C  | -2.48710100 | 7.30535800  | -3.77004100 |
| H  | -0.51163200 | 6.51002600  | -4.10238400 |
| H  | -4.55646900 | 7.80962200  | -3.43323200 |
| H  | -2.15174800 | 8.33946000  | -3.74639300 |
| N  | -5.70071600 | 1.66188500  | -3.35586000 |
| S  | -5.60857500 | 1.03714200  | -1.70359400 |
| O  | -6.85353900 | 0.30981800  | -1.53971500 |
| O  | -5.27274900 | 2.19684500  | -0.89969500 |
| C  | -6.55985400 | 0.96280800  | -4.32580300 |
| H  | -6.54692300 | 1.54012900  | -5.25344400 |
| H  | -7.57908500 | 0.89999200  | -3.94231000 |
| Au | -2.78495500 | 1.83784800  | -5.21505000 |
| P  | -1.56724700 | 0.41205900  | -6.67430900 |
| H  | -6.16427200 | -0.04259700 | -4.51664600 |
| C  | -4.24815100 | -0.07451100 | -1.73544300 |
| C  | -4.48720000 | -1.43275100 | -1.95098900 |
| C  | -2.96097100 | 0.42588800  | -1.53637700 |

|   |             |             |             |
|---|-------------|-------------|-------------|
| C | -3.40628100 | -2.29954200 | -1.96313600 |
| H | -5.50164900 | -1.80013200 | -2.08566200 |
| C | -1.89459000 | -0.46422600 | -1.56146300 |
| H | -2.79909800 | 1.48158800  | -1.33202800 |
| C | -2.09910900 | -1.83034000 | -1.77640300 |
| H | -3.57175500 | -3.36409900 | -2.12195800 |
| H | -0.88353800 | -0.09350000 | -1.40106500 |
| C | -0.94920400 | -2.78473600 | -1.81405000 |
| H | -0.95747600 | -3.36942200 | -2.74295800 |
| H | -1.01053900 | -3.50483600 | -0.98870300 |
| H | 0.01165900  | -2.26552800 | -1.73960900 |
| C | -2.34825300 | -1.31462400 | -6.62512600 |
| C | -2.72881400 | -1.63999800 | -5.18098200 |
| C | -1.46869400 | -2.43944100 | -7.16210100 |
| C | -3.63081100 | -1.22501100 | -7.45550400 |
| H | -3.42713000 | -0.90130600 | -4.76396800 |
| H | -1.85831100 | -1.69651300 | -4.51795400 |
| H | -3.22398700 | -2.62132100 | -5.16178100 |
| H | -1.17569100 | -2.29464900 | -8.20703500 |
| H | -2.04513900 | -3.37398300 | -7.11797900 |
| H | -0.56703500 | -2.58607000 | -6.55623000 |
| H | -4.18721600 | -2.16460700 | -7.33687300 |
| H | -3.42856800 | -1.08853300 | -8.52456700 |
| H | -4.28389100 | -0.40670000 | -7.11999500 |
| C | 0.22417600  | 0.51239400  | -6.05745100 |
| C | 1.28276800  | -0.22735900 | -6.87204400 |
| C | 0.25372800  | -0.00024800 | -4.61765600 |
| C | 0.56677800  | 2.00492800  | -6.07246100 |
| H | 1.43209300  | 0.22086900  | -7.85938900 |
| H | 1.06743900  | -1.29410400 | -6.99538800 |

|   |             |             |              |
|---|-------------|-------------|--------------|
| H | 2.23734300  | -0.14681900 | -6.33413600  |
| H | -0.52951500 | 0.46242200  | -4.00099300  |
| H | 1.22672000  | 0.25048900  | -4.17331200  |
| H | 0.14037200  | -1.09045800 | -4.56907800  |
| H | 1.59635200  | 2.13485400  | -5.71199200  |
| H | -0.09685600 | 2.58757200  | -5.41814300  |
| H | 0.51237000  | 2.42857700  | -7.08396200  |
| C | -1.54823500 | 0.88802300  | -8.45170900  |
| C | -2.33098200 | 1.92948900  | -8.99265100  |
| C | -0.75130100 | 0.12973000  | -9.32679500  |
| C | -2.26831800 | 2.17802500  | -10.37059400 |
| C | -3.27882100 | 2.80006800  | -8.24131900  |
| C | -0.70341600 | 0.39045700  | -10.68910500 |
| H | -0.15273600 | -0.69069700 | -8.94444100  |
| C | -1.46392100 | 1.42712800  | -11.21534200 |
| H | -2.87781000 | 2.98373900  | -10.77631200 |
| C | -2.84826000 | 3.98940900  | -7.64347800  |
| C | -4.64692000 | 2.50909200  | -8.26650200  |
| H | -0.07440000 | -0.21962000 | -11.33259600 |
| H | -1.43879500 | 1.64718600  | -12.27989100 |
| C | -3.77034200 | 4.87114100  | -7.08401100  |
| H | -1.78439200 | 4.22914600  | -7.63378300  |
| C | -5.56677600 | 3.38648100  | -7.69696200  |
| H | -4.98865100 | 1.59705700  | -8.75562600  |
| C | -5.13026800 | 4.57158500  | -7.10870600  |
| H | -3.42357200 | 5.79757300  | -6.62911200  |
| H | -6.62912700 | 3.15342600  | -7.73317300  |
| H | -5.84852400 | 5.26617000  | -6.67765100  |

**SMD-M06/6-31G(d,p)/SDD**

Electronic Energy (0K) = -2476.248646

Electronic Energy (0K) + ZPE = -2475.556150

Enthalpy (298K) = -2475.511610

Free Energy (298K) = -2475.631981

**SMD-M06/6-311+G(d,p)/SDD**

Electronic Energy (0K) = -2476.663443

**2a**

Number of imaginary frequencies: 0

|   |            |             |             |
|---|------------|-------------|-------------|
| C | 4.74513500 | 1.37410700  | -0.40801700 |
| C | 3.34993500 | 1.36410700  | -0.40801700 |
| C | 2.57746200 | 2.52204100  | -0.40801700 |
| C | 3.28123900 | 3.71628400  | -0.40801700 |
| C | 4.68965200 | 3.75360700  | -0.40801700 |
| C | 5.43896300 | 2.59078100  | -0.40801700 |
| C | 5.06979900 | -0.01614900 | -0.40801700 |
| H | 1.49234800 | 2.48527500  | -0.40801700 |
| H | 2.72894400 | 4.65309300  | -0.40801700 |
| H | 5.19138100 | 4.71792800  | -0.40801700 |
| H | 6.52527000 | 2.61871600  | -0.40801700 |
| H | 6.04625100 | -0.48783100 | -0.40801700 |
| O | 2.89988200 | 0.09179400  | -0.40801700 |
| N | 4.00428100 | -0.76600300 | -0.40801700 |

**SMD-M06/6-31G(d,p)/SDD**

Electronic Energy (0K) = -399.415612

Electronic Energy (0K) + ZPE = -399.310375

Enthalpy (298K) = -399.303550

Free Energy (298K) = -399.340496

**SMD-M06/6-311+G(d,p)/SDD**

Electronic Energy (0K) = -399.512212

**TS<sub>A</sub>**

Number of imaginary frequencies: 1

|    |             |             |             |
|----|-------------|-------------|-------------|
| C  | -4.22990700 | 2.33823500  | -2.68841300 |
| C  | -3.10417400 | 2.73907400  | -3.21914100 |
| C  | -2.32862300 | 3.93450500  | -2.89970500 |
| C  | -1.62994700 | 4.62397600  | -3.90045200 |
| C  | -2.21125100 | 4.37229400  | -1.57049600 |
| C  | -0.88867300 | 5.75785900  | -3.59419100 |
| H  | -1.69213300 | 4.26411300  | -4.92695300 |
| C  | -1.44462300 | 5.49027300  | -1.26431000 |
| H  | -2.70962700 | 3.81652200  | -0.77866200 |
| C  | -0.79344100 | 6.19443700  | -2.27443000 |
| H  | -0.37106300 | 6.29373100  | -4.38717800 |
| H  | -1.35495800 | 5.81338900  | -0.22953300 |
| H  | -0.19993800 | 7.07285700  | -2.03125800 |
| N  | -5.00433100 | 1.28907900  | -2.43960300 |
| S  | -4.63379400 | 0.38421400  | -0.99970800 |
| O  | -5.84738300 | -0.36024700 | -0.70284800 |
| O  | -4.09952900 | 1.35861300  | -0.05634200 |
| C  | -6.30686500 | 1.11054800  | -3.08864600 |
| H  | -7.06820000 | 1.76099700  | -2.64172400 |
| H  | -6.61907600 | 0.06825100  | -2.99362400 |
| Au | -2.65547000 | 1.53264500  | -4.91637200 |
| P  | -2.08666400 | 0.20653600  | -6.82164000 |
| H  | -6.18266300 | 1.35080700  | -4.14941800 |
| C  | -3.34622700 | -0.71989700 | -1.46718900 |
| C  | -3.67456400 | -2.03774800 | -1.78410200 |
| C  | -2.03110500 | -0.25826000 | -1.50501500 |
| C  | -2.65498900 | -2.90542200 | -2.14197800 |
| H  | -4.70723400 | -2.37448000 | -1.73514700 |

|   |             |             |             |
|---|-------------|-------------|-------------|
| C | -1.02913900 | -1.14451200 | -1.88099700 |
| H | -1.79227900 | 0.76653700  | -1.22894400 |
| C | -1.32461200 | -2.47194000 | -2.20548600 |
| H | -2.88970000 | -3.94008000 | -2.38790800 |
| H | 0.00349900  | -0.80154200 | -1.91821900 |
| C | -0.25027100 | -3.42220000 | -2.62906400 |
| H | -0.50362100 | -3.89461200 | -3.58710300 |
| H | -0.13292900 | -4.23335000 | -1.89960500 |
| H | 0.71687400  | -2.92055400 | -2.73556800 |
| C | -3.06646000 | -1.42156500 | -6.73900500 |
| C | -3.24573100 | -1.79298400 | -5.26581500 |
| C | -2.43250600 | -2.61179500 | -7.45537400 |
| C | -4.44836500 | -1.13933600 | -7.32946000 |
| H | -3.79152300 | -1.01659900 | -4.71005400 |
| H | -2.29183800 | -1.96746600 | -4.75547600 |
| H | -3.82875700 | -2.72343700 | -5.20628100 |
| H | -2.32628400 | -2.46238300 | -8.53454400 |
| H | -3.08935400 | -3.48219800 | -7.31849800 |
| H | -1.45349400 | -2.87453200 | -7.03781200 |
| H | -5.07712300 | -2.02921600 | -7.18802800 |
| H | -4.41267900 | -0.92124900 | -8.40295200 |
| H | -4.94535900 | -0.30158300 | -6.82050800 |
| C | -0.20612800 | -0.01303200 | -6.69864500 |
| C | 0.47794200  | -0.73317600 | -7.85787800 |
| C | 0.09825300  | -0.75519300 | -5.39729500 |
| C | 0.35973300  | 1.40847900  | -6.61541100 |
| H | 0.41803800  | -0.16495200 | -8.79209800 |
| H | 0.08393900  | -1.74030000 | -8.03180300 |
| H | 1.54356500  | -0.83612200 | -7.61003400 |
| H | -0.40134100 | -0.29361100 | -4.53417900 |

|   |             |             |              |
|---|-------------|-------------|--------------|
| H | 1.18185400  | -0.72273200 | -5.21574900  |
| H | -0.19595400 | -1.81112700 | -5.44876200  |
| H | 1.45571900  | 1.35181700  | -6.56046400  |
| H | 0.00340600  | 1.94188800  | -5.72310000  |
| H | 0.10248500  | 2.00701400  | -7.50022300  |
| C | -2.37971700 | 0.90666800  | -8.50553600  |
| C | -2.88268600 | 2.20201400  | -8.75711100  |
| C | -2.00566400 | 0.11681800  | -9.60598400  |
| C | -2.93665500 | 2.65940400  | -10.08274300 |
| C | -3.40866900 | 3.15580500  | -7.74556800  |
| C | -2.09245700 | 0.57690600  | -10.91225900 |
| H | -1.62306800 | -0.88561800 | -9.44486300  |
| C | -2.54868700 | 1.86715200  | -11.15215400 |
| H | -3.32015400 | 3.66179600  | -10.26491400 |
| C | -2.80353800 | 4.40910500  | -7.60048300  |
| C | -4.59156100 | 2.89302800  | -7.04463200  |
| H | -1.79567500 | -0.07030400 | -11.73383500 |
| H | -2.61382800 | 2.25263100  | -12.16684500 |
| C | -3.36016100 | 5.37406400  | -6.76618100  |
| H | -1.89236700 | 4.62601700  | -8.15737000  |
| C | -5.15176600 | 3.86212800  | -6.21584100  |
| H | -5.08914300 | 1.93262100  | -7.17736400  |
| C | -4.53647800 | 5.10321300  | -6.07268500  |
| H | -2.87271500 | 6.34109200  | -6.65782300  |
| H | -6.07857300 | 3.64879700  | -5.68560600  |
| H | -4.97359900 | 5.85821000  | -5.42304300  |
| C | -6.73033900 | 5.03829800  | -0.76111900  |
| C | -6.35746400 | 5.62336800  | -1.97355100  |
| C | -6.90695300 | 6.80409200  | -2.45951900  |
| C | -7.87453400 | 7.38425900  | -1.65548300  |



|   |             |            |             |
|---|-------------|------------|-------------|
| C | -8.27195900 | 6.81660100 | -0.42747900 |
| C | -7.71052200 | 5.64351700 | 0.03846900  |
| C | -5.91437700 | 3.87505400 | -0.69157900 |
| H | -6.59563300 | 7.23818500 | -3.40453600 |
| H | -8.34356800 | 8.30913000 | -1.98209700 |
| H | -9.03632400 | 7.31776100 | 0.16025500  |
| H | -8.01283600 | 5.20406000 | 0.98461900  |
| H | -5.84607900 | 3.10615800 | 0.07174200  |
| O | -5.40447200 | 4.87252600 | -2.57463600 |
| N | -5.14330500 | 3.80310800 | -1.74308100 |

**SMD-M06/6-31G(d,p)/SDD**

Electronic Energy (0K) = -2875.657538

Electronic Energy (0K) + ZPE = -2874.860629

Enthalpy (298K) = -2874.808567

Free Energy (298K) = -2874.948334

**SMD-M06/6-311+G(d,p)/SDD**

Electronic Energy (0K) = -2876.165287

**A**

Number of imaginary frequencies: 0

|   |             |            |             |
|---|-------------|------------|-------------|
| C | -1.37687600 | 0.73089900 | 1.84709200  |
| C | -0.23397500 | 0.86394300 | 1.13833400  |
| C | 0.63687300  | 2.03194100 | 1.37232600  |
| C | 1.21511400  | 2.74599600 | 0.31298200  |
| C | 0.96576800  | 2.41055000 | 2.68548300  |
| C | 2.04578900  | 3.83321800 | 0.55465900  |
| H | 0.99222900  | 2.44260100 | -0.70905600 |
| C | 1.82228000  | 3.47921000 | 2.92463000  |
| H | 0.56325200  | 1.84345200 | 3.52487200  |
| C | 2.35554400  | 4.20357700 | 1.86167500  |

|    |             |             |             |
|----|-------------|-------------|-------------|
| H  | 2.46673900  | 4.38483600  | -0.28353700 |
| H  | 2.07390100  | 3.74696600  | 3.94861600  |
| H  | 3.02034200  | 5.04336600  | 2.05055600  |
| N  | -2.19124000 | -0.41216500 | 2.00149200  |
| S  | -1.80878500 | -1.44324400 | 3.28153900  |
| O  | -3.01430200 | -2.22059600 | 3.54147600  |
| O  | -1.25869800 | -0.56395400 | 4.31432600  |
| C  | -2.92751900 | -0.95615200 | 0.86170500  |
| H  | -3.56776400 | -0.16711600 | 0.45317400  |
| H  | -3.56677100 | -1.77502600 | 1.20124600  |
| Au | 0.30232100  | -0.38440600 | -0.46559000 |
| P  | 1.19128800  | -1.58791100 | -2.36388500 |
| H  | -2.24672400 | -1.31393000 | 0.07392600  |
| C  | -0.52872000 | -2.57014000 | 2.80938200  |
| C  | -0.87064700 | -3.88114900 | 2.47948200  |
| C  | 0.80013400  | -2.14843900 | 2.82818100  |
| C  | 0.14060100  | -4.77812900 | 2.16956300  |
| H  | -1.91210600 | -4.19278400 | 2.49056400  |
| C  | 1.79644200  | -3.06131200 | 2.50366000  |
| H  | 1.05483800  | -1.13062400 | 3.11516300  |
| C  | 1.48300700  | -4.38161500 | 2.16777400  |
| H  | -0.11039800 | -5.80719600 | 1.91539500  |
| H  | 2.83855200  | -2.74557800 | 2.51613500  |
| C  | 2.54912000  | -5.35534500 | 1.77700600  |
| H  | 2.39924600  | -5.69654900 | 0.74271700  |
| H  | 2.52325800  | -6.25039200 | 2.41020300  |
| H  | 3.54818300  | -4.91345600 | 1.84780000  |
| C  | 0.52112000  | -3.36681000 | -2.40778400 |
| C  | 0.26362000  | -3.78705900 | -0.96175200 |
| C  | 1.43025400  | -4.41508800 | -3.04515900 |

|   |             |             |             |
|---|-------------|-------------|-------------|
| C | -0.81914400 | -3.32598400 | -3.14145000 |
| H | -0.47238500 | -3.13588300 | -0.47182700 |
| H | 1.17622300  | -3.77551300 | -0.35672700 |
| H | -0.13046900 | -4.81395900 | -0.95207000 |
| H | 1.63940300  | -4.23012300 | -4.10336100 |
| H | 0.92068500  | -5.38734200 | -2.98867300 |
| H | 2.38185000  | -4.51656800 | -2.50934300 |
| H | -1.29811000 | -4.31089100 | -3.05268500 |
| H | -0.71007700 | -3.10013700 | -4.20833300 |
| H | -1.50281700 | -2.58774600 | -2.69914700 |
| C | 3.07116900  | -1.49580800 | -2.09684800 |
| C | 3.95339200  | -2.06448900 | -3.20578600 |
| C | 3.39996300  | -2.19957800 | -0.77966200 |
| C | 3.38970800  | -0.00375500 | -1.95462600 |
| H | 3.87553300  | -1.48634700 | -4.13274600 |
| H | 3.74607100  | -3.11599600 | -3.43007900 |
| H | 4.99844400  | -2.00035300 | -2.87191500 |
| H | 2.77084500  | -1.83680200 | 0.04506000  |
| H | 4.44731900  | -1.99047600 | -0.51984100 |
| H | 3.29009200  | -3.28927700 | -0.85164100 |
| H | 4.47659500  | 0.11767600  | -1.84671200 |
| H | 2.91244000  | 0.43389600  | -1.06787100 |
| H | 3.07755700  | 0.57333100  | -2.83629800 |
| C | 0.93162300  | -0.90120100 | -4.06173300 |
| C | 0.25725300  | 0.30719100  | -4.34243000 |
| C | 1.51372200  | -1.59654600 | -5.13535700 |
| C | 0.24904300  | 0.78661300  | -5.66169300 |
| C | -0.50947600 | 1.13356600  | -3.37428500 |
| C | 1.47095600  | -1.12104200 | -6.43834700 |
| H | 2.02901300  | -2.53424400 | -4.95474000 |

|   |             |             |             |
|---|-------------|-------------|-------------|
| C | 0.84638600  | 0.09180900  | -6.70183700 |
| H | -0.27010300 | 1.72159800  | -5.86539100 |
| C | -0.16063300 | 2.47406200  | -3.17828400 |
| C | -1.67883100 | 0.64831100  | -2.77664700 |
| H | 1.93241800  | -1.69485800 | -7.23822200 |
| H | 0.81101600  | 0.48940500  | -7.71334800 |
| C | -0.95370400 | 3.30848200  | -2.39537500 |
| H | 0.73984800  | 2.86309500  | -3.65315000 |
| C | -2.47964100 | 1.48731200  | -2.00672400 |
| H | -1.97932600 | -0.38441800 | -2.95250400 |
| C | -2.11730300 | 2.81802100  | -1.80959500 |
| H | -0.66237900 | 4.34659300  | -2.24768300 |
| H | -3.39738400 | 1.10035800  | -1.56759100 |
| H | -2.74617400 | 3.47138600  | -1.20851600 |
| C | -2.93097900 | 3.40702600  | 3.80263800  |
| C | -2.64206200 | 3.95065300  | 2.54464200  |
| C | -2.92261600 | 5.26169100  | 2.18627600  |
| C | -3.52632000 | 6.02231400  | 3.17355400  |
| C | -3.83132400 | 5.50508100  | 4.45172500  |
| C | -3.54166300 | 4.20023500  | 4.78855200  |
| C | -2.46042300 | 2.08098200  | 3.72696600  |
| H | -2.68301000 | 5.65499200  | 1.20373000  |
| H | -3.77388900 | 7.05835100  | 2.95711100  |
| H | -4.30344100 | 6.15691800  | 5.18118600  |
| H | -3.77006000 | 3.79538600  | 5.76956000  |
| H | -2.42760400 | 1.27971000  | 4.45821900  |
| O | -2.06752200 | 3.01761300  | 1.75175900  |
| N | -1.94909000 | 1.88249000  | 2.52987900  |

**SMD-M06/6-31G(d,p)/SDD**

Electronic Energy (0K) = -2875.678179

Electronic Energy (0K) + ZPE = -2874.878429

Enthalpy (298K) = -2874.827039

Free Energy (298K) = -2874.963314

**SMD-M06/6-311+G(d,p)/SDD**

Electronic Energy (0K) = -2876.184640

**TS<sub>B</sub>**

Number of imaginary frequencies: 1

|    |             |             |             |
|----|-------------|-------------|-------------|
| C  | -1.12187100 | 0.97976100  | 1.79441500  |
| C  | -0.23754300 | 1.41247100  | 0.78984100  |
| C  | 0.09249900  | 2.81274800  | 0.63793600  |
| C  | -0.83890100 | 3.86012000  | 0.81479000  |
| C  | 1.41249600  | 3.14842200  | 0.26503600  |
| C  | -0.45154900 | 5.18099700  | 0.65282000  |
| H  | -1.87791600 | 3.62241400  | 1.03100700  |
| C  | 1.80606500  | 4.47217100  | 0.15494700  |
| H  | 2.12485400  | 2.34275500  | 0.09209300  |
| C  | 0.87306000  | 5.49134100  | 0.34482500  |
| H  | -1.18447900 | 5.97552400  | 0.76924000  |
| H  | 2.83523600  | 4.71308800  | -0.09869600 |
| H  | 1.17530700  | 6.53040000  | 0.23669000  |
| N  | -1.55587600 | -0.36441200 | 1.84728200  |
| S  | -1.45230700 | -1.19237400 | 3.31638900  |
| O  | -2.79075100 | -1.61885200 | 3.70659800  |
| O  | -0.65099800 | -0.35212600 | 4.19975900  |
| C  | -2.55338200 | -0.83705900 | 0.88735000  |
| H  | -3.55992700 | -0.47457100 | 1.13033000  |
| H  | -2.55883500 | -1.93253500 | 0.86804000  |
| Au | 0.52184500  | 0.06345000  | -0.61040500 |
| P  | 1.49833000  | -1.44342800 | -2.22588500 |

|   |             |             |             |
|---|-------------|-------------|-------------|
| H | -2.26230100 | -0.48446200 | -0.10986800 |
| C | -0.50033200 | -2.62890200 | 2.91777500  |
| C | -1.13127900 | -3.85233000 | 2.71715100  |
| C | 0.88699000  | -2.50194700 | 2.84292100  |
| C | -0.35309800 | -4.96428100 | 2.41517900  |
| H | -2.21185100 | -3.93253200 | 2.80779300  |
| C | 1.64517700  | -3.62509600 | 2.55171400  |
| H | 1.36282400  | -1.53943100 | 3.02221200  |
| C | 1.03690600  | -4.86499200 | 2.31704200  |
| H | -0.83268400 | -5.92760100 | 2.25029800  |
| H | 2.73016200  | -3.54478700 | 2.49521200  |
| C | 1.86275300  | -6.04044000 | 1.90321700  |
| H | 2.05784600  | -6.00057700 | 0.82106500  |
| H | 1.35416800  | -6.98791300 | 2.10783100  |
| H | 2.83625800  | -6.04865300 | 2.40521400  |
| C | 0.61993900  | -3.12723100 | -2.17374900 |
| C | 0.20116500  | -3.39401900 | -0.72836700 |
| C | 1.44471300  | -4.31734000 | -2.65914300 |
| C | -0.64809800 | -2.99618200 | -3.01732800 |
| H | -0.44848700 | -2.59857700 | -0.33813400 |
| H | 1.05844100  | -3.49126300 | -0.05384400 |
| H | -0.35849800 | -4.33992200 | -0.69382000 |
| H | 1.73589100  | -4.24451200 | -3.71217400 |
| H | 0.82883700  | -5.22249400 | -2.56075000 |
| H | 2.34595000  | -4.47048100 | -2.05382900 |
| H | -1.22421400 | -3.92746100 | -2.92901200 |
| H | -0.43638200 | -2.83230900 | -4.08025600 |
| H | -1.29008100 | -2.17923800 | -2.65940100 |
| C | 3.33368200  | -1.52576300 | -1.74636900 |
| C | 4.25848200  | -2.27881000 | -2.69971500 |

|   |             |             |             |
|---|-------------|-------------|-------------|
| C | 3.43364400  | -2.14861400 | -0.35373000 |
| C | 3.80325100  | -0.06869900 | -1.68121200 |
| H | 4.35704100  | -1.77238600 | -3.66561000 |
| H | 3.95031400  | -3.31462600 | -2.87553500 |
| H | 5.25927500  | -2.30688100 | -2.24663200 |
| H | 2.75283800  | -1.66950400 | 0.36333800  |
| H | 4.45913100  | -2.01672800 | 0.01901900  |
| H | 3.22516600  | -3.22646500 | -0.36654400 |
| H | 4.87868700  | -0.05245900 | -1.45605300 |
| H | 3.28445400  | 0.49479500  | -0.89416200 |
| H | 3.65559100  | 0.45657900  | -2.63498800 |
| C | 1.48848400  | -0.90046200 | -3.99030200 |
| C | 0.95355300  | 0.32869600  | -4.43295500 |
| C | 2.11768200  | -1.72823700 | -4.93540500 |
| C | 1.13156900  | 0.69877300  | -5.77471300 |
| C | 0.14773700  | 1.28004000  | -3.62348200 |
| C | 2.25703000  | -1.35866100 | -6.26579100 |
| H | 2.52290800  | -2.68678100 | -4.62812000 |
| C | 1.77596600  | -0.12447100 | -6.68539400 |
| H | 0.72162000  | 1.65168200  | -6.10475000 |
| C | 0.58877900  | 2.59635700  | -3.45019000 |
| C | -1.13388300 | 0.93439600  | -3.17650400 |
| H | 2.74749200  | -2.03147500 | -6.96488000 |
| H | 1.88705800  | 0.19108200  | -7.72007000 |
| C | -0.23305800 | 3.54622300  | -2.85010500 |
| H | 1.57968800  | 2.87594800  | -3.80760000 |
| C | -1.95872300 | 1.88734200  | -2.58249800 |
| H | -1.49995100 | -0.07889400 | -3.33946200 |
| C | -1.51164100 | 3.19656800  | -2.42324000 |
| H | 0.12297200  | 4.56690700  | -2.72474500 |

|   |             |            |             |
|---|-------------|------------|-------------|
| H | -2.96049900 | 1.60791600 | -2.26136200 |
| H | -2.16024700 | 3.94482000 | -1.97268500 |
| C | -2.20081100 | 3.48800200 | 4.17734800  |
| C | -3.39578700 | 3.33864300 | 3.41015100  |
| C | -4.52453800 | 4.11348700 | 3.76049400  |
| C | -4.40690100 | 5.00145600 | 4.80810300  |
| C | -3.21661300 | 5.15129400 | 5.55779500  |
| C | -2.11332100 | 4.39227700 | 5.25342200  |
| C | -1.25303000 | 2.56365100 | 3.71971200  |
| H | -5.44554900 | 4.00781800 | 3.19502000  |
| H | -5.26873200 | 5.61158000 | 5.07130300  |
| H | -3.18697100 | 5.86153300 | 6.37893700  |
| H | -1.18815500 | 4.47454500 | 5.81874700  |
| H | -0.27067300 | 2.40078700 | 4.16521700  |
| O | -3.34579400 | 2.48256700 | 2.44631400  |
| N | -1.59804100 | 1.80431200 | 2.72476600  |

**SMD-M06/6-31G(d,p)/SDD**

Electronic Energy (0K) = -2875.657886

Electronic Energy (0K) + ZPE = -2874.861555

Enthalpy (298K) = -2874.809967

Free Energy (298K) = -2874.947655

**SMD-M06/6-311+G(d,p)/SDD**

Electronic Energy (0K) = -2876.166470

**B**

Number of imaginary frequencies: 0

|   |             |            |            |
|---|-------------|------------|------------|
| C | -0.28919300 | 1.13263000 | 2.50427500 |
| C | 0.90530700  | 1.29166800 | 1.65595400 |
| C | 1.80070300  | 2.36447900 | 1.86746200 |
| C | 2.83756300  | 2.58761700 | 0.92425700 |



|    |             |             |             |
|----|-------------|-------------|-------------|
| C  | 1.70136800  | 3.23650400  | 2.98622000  |
| C  | 3.71682700  | 3.64281900  | 1.07673700  |
| H  | 2.92519700  | 1.90284200  | 0.08175300  |
| C  | 2.57632500  | 4.29158400  | 3.12666200  |
| H  | 0.92795200  | 3.07127200  | 3.73158400  |
| C  | 3.58062100  | 4.49552600  | 2.17235900  |
| H  | 4.50604800  | 3.80861300  | 0.34877900  |
| H  | 2.49576200  | 4.95980700  | 3.97928300  |
| H  | 4.27101200  | 5.32724900  | 2.29295000  |
| N  | -0.51243000 | 0.00923700  | 3.26215100  |
| S  | 0.80443500  | -0.75177700 | 4.07230400  |
| O  | 0.32478000  | -1.00342400 | 5.42074100  |
| O  | 1.95090700  | 0.11377800  | 3.82962500  |
| C  | -1.86847900 | -0.24758200 | 3.75671000  |
| H  | -2.53442500 | -0.32835500 | 2.89458800  |
| H  | -2.19696100 | 0.54938800  | 4.43291500  |
| Au | 0.78030300  | 0.17446600  | -0.09326600 |
| P  | 0.72155700  | -1.18791700 | -2.08767200 |
| H  | -1.88040700 | -1.18853100 | 4.30645300  |
| C  | 1.06998100  | -2.29391700 | 3.25861300  |
| C  | 0.15040200  | -3.33223100 | 3.41899300  |
| C  | 2.24367500  | -2.46255700 | 2.52975700  |
| C  | 0.40222500  | -4.54251300 | 2.79311100  |
| H  | -0.74165600 | -3.20833100 | 4.02813300  |
| C  | 2.48784800  | -3.69514300 | 1.93706000  |
| H  | 2.95817800  | -1.64782700 | 2.44017600  |
| C  | 1.56480700  | -4.73790700 | 2.03574100  |
| H  | -0.31230000 | -5.35763700 | 2.89343400  |
| H  | 3.40745100  | -3.84661600 | 1.37431800  |
| C  | 1.77999200  | -6.02014700 | 1.29945000  |

|   |             |             |             |
|---|-------------|-------------|-------------|
| H | 1.16324000  | -6.03658100 | 0.38890900  |
| H | 1.48438200  | -6.88790800 | 1.89927400  |
| H | 2.82425300  | -6.14212400 | 0.99455700  |
| C | -0.51606800 | -2.60276800 | -1.78447300 |
| C | -0.48564700 | -2.91860100 | -0.28521800 |
| C | -0.25678700 | -3.90450900 | -2.53978200 |
| C | -1.90338800 | -2.05734000 | -2.12635100 |
| H | -0.81589300 | -2.06143500 | 0.31649700  |
| H | 0.50966200  | -3.22542500 | 0.05888500  |
| H | -1.17519200 | -3.75352600 | -0.09109200 |
| H | -0.28356100 | -3.79938900 | -3.62876200 |
| H | -1.05121700 | -4.61463400 | -2.26984700 |
| H | 0.69794300  | -4.36357700 | -2.25698000 |
| H | -2.65502800 | -2.78526500 | -1.78893600 |
| H | -2.04412300 | -1.90446000 | -3.20213400 |
| H | -2.10037800 | -1.11421900 | -1.59806500 |
| C | 2.49211500  | -1.77144500 | -2.42735900 |
| C | 2.68284500  | -2.58889800 | -3.70195600 |
| C | 2.97199300  | -2.57642800 | -1.22318500 |
| C | 3.33079900  | -0.49643500 | -2.54049200 |
| H | 2.43642500  | -2.01549400 | -4.60221900 |
| H | 2.10146800  | -3.51637600 | -3.70803500 |
| H | 3.74402800  | -2.86539400 | -3.77323000 |
| H | 2.86885200  | -2.00676400 | -0.29005500 |
| H | 4.03647200  | -2.81642100 | -1.35574700 |
| H | 2.43015600  | -3.52473200 | -1.11079800 |
| H | 4.38202900  | -0.77671800 | -2.69492000 |
| H | 3.27240500  | 0.11458100  | -1.62914800 |
| H | 3.02388700  | 0.12199900  | -3.39411500 |
| C | 0.24243400  | -0.35194600 | -3.66300400 |

|   |             |             |             |
|---|-------------|-------------|-------------|
| C | 0.19469100  | 1.04893500  | -3.82683400 |
| C | 0.02834300  | -1.15908000 | -4.79213300 |
| C | -0.01926500 | 1.57345000  | -5.11014600 |
| C | 0.30722700  | 2.06163500  | -2.74458400 |
| C | -0.21229700 | -0.62280500 | -6.04934800 |
| H | 0.06097200  | -2.23992500 | -4.69648600 |
| C | -0.22259100 | 0.75714400  | -6.21251900 |
| H | -0.04936700 | 2.65560200  | -5.22533200 |
| C | 1.35738400  | 2.98606300  | -2.75173800 |
| C | -0.71665800 | 2.21016000  | -1.80090700 |
| H | -0.38006900 | -1.28438100 | -6.89559300 |
| H | -0.39723900 | 1.19809800  | -7.19106600 |
| C | 1.39149000  | 4.02727300  | -1.82799700 |
| H | 2.14501000  | 2.89003800  | -3.49848300 |
| C | -0.69527500 | 3.27031800  | -0.89652100 |
| H | -1.55183600 | 1.50907500  | -1.79586700 |
| C | 0.36149500  | 4.17567500  | -0.90124900 |
| H | 2.21761900  | 4.73550600  | -1.84383900 |
| H | -1.51546000 | 3.38500000  | -0.18969600 |
| H | 0.38214900  | 4.99799000  | -0.18775800 |
| C | -3.39808000 | 2.05486700  | 1.45003800  |
| C | -3.23319100 | 0.91348000  | 0.54651000  |
| C | -4.34126400 | 0.66500800  | -0.34754700 |
| C | -5.47854700 | 1.41783100  | -0.30935500 |
| C | -5.63583000 | 2.50293800  | 0.60264600  |
| C | -4.61358700 | 2.80924700  | 1.44942100  |
| C | -2.38051200 | 2.49033900  | 2.29769700  |
| H | -4.23848900 | -0.16833800 | -1.04104000 |
| H | -6.29533900 | 1.18531900  | -0.99132700 |
| H | -6.55818800 | 3.07696500  | 0.60925100  |

|   |             |            |            |
|---|-------------|------------|------------|
| H | -4.69871900 | 3.64229900 | 2.14746900 |
| H | -2.59693800 | 3.37673700 | 2.90413600 |
| O | -2.20735100 | 0.19455000 | 0.55282400 |
| N | -1.13537200 | 2.08321500 | 2.38765000 |

**SMD-M06/6-31G(d,p)/SDD**

Electronic Energy (0K) = -2875.690045

Electronic Energy (0K) + ZPE = -2874.892409

Enthalpy (298K) = -2874.840137

Free Energy (298K) = -2874.977773

**SMD-M06/6-311+G(d,p)/SDD**

Electronic Energy (0K) = -2876.196508

**TS<sub>c</sub>**

Number of imaginary frequencies: 1

|   |             |             |             |
|---|-------------|-------------|-------------|
| C | -0.14220800 | 1.16878100  | 2.60053100  |
| C | 0.85404100  | 1.40130300  | 1.52378000  |
| C | 1.76209400  | 2.48028600  | 1.71528600  |
| C | 2.60879800  | 2.85674900  | 0.64060400  |
| C | 1.90046500  | 3.17127200  | 2.95133000  |
| C | 3.52693000  | 3.88048400  | 0.78206400  |
| H | 2.51714400  | 2.32252900  | -0.30378100 |
| C | 2.82451900  | 4.18425900  | 3.08818100  |
| H | 1.27593400  | 2.90140500  | 3.79879800  |
| C | 3.63479800  | 4.54196300  | 2.00454300  |
| H | 4.16226400  | 4.16372700  | -0.05262000 |
| H | 2.92783000  | 4.70292100  | 4.03705700  |
| H | 4.36109300  | 5.34323300  | 2.12057500  |
| N | 0.12201300  | 0.42280600  | 3.71440600  |
| S | 1.45839000  | -0.64857800 | 3.79754400  |
| O | 1.72117500  | -0.79983800 | 5.21943700  |

|    |             |             |             |
|----|-------------|-------------|-------------|
| O  | 2.47688100  | -0.08094300 | 2.92253100  |
| C  | -0.88315800 | 0.41259400  | 4.78271700  |
| H  | -1.84872800 | 0.07985500  | 4.38627900  |
| H  | -0.98048500 | 1.42183800  | 5.19431900  |
| Au | 0.66693000  | 0.35069200  | -0.26327100 |
| P  | 0.79178800  | -1.00744000 | -2.24337000 |
| H  | -0.55436100 | -0.25952600 | 5.57593300  |
| C  | 0.92666400  | -2.19039600 | 3.11577200  |
| C  | -0.37531200 | -2.65075200 | 3.28035100  |
| C  | 1.90756700  | -2.96954200 | 2.50052900  |
| C  | -0.70302600 | -3.90706800 | 2.78656200  |
| H  | -1.13536700 | -2.03893700 | 3.75746600  |
| C  | 1.56090500  | -4.22735100 | 2.03159200  |
| H  | 2.92245000  | -2.59541700 | 2.38720000  |
| C  | 0.25286300  | -4.70914200 | 2.15708500  |
| H  | -1.72375100 | -4.27164200 | 2.88764900  |
| H  | 2.31416800  | -4.84487800 | 1.54390700  |
| C  | -0.10720000 | -6.04594900 | 1.59160100  |
| H  | 0.07048700  | -6.06754600 | 0.50801300  |
| H  | -1.15857700 | -6.29215700 | 1.76886500  |
| H  | 0.50994900  | -6.84001600 | 2.02902900  |
| C  | -0.45563700 | -2.43433900 | -2.10999100 |
| C  | -0.54922500 | -2.84015000 | -0.63685800 |
| C  | -0.13319200 | -3.68583200 | -2.92289400 |
| C  | -1.80647300 | -1.86546800 | -2.54586600 |
| H  | -0.82626500 | -2.00109400 | 0.01497900  |
| H  | 0.38981600  | -3.26429300 | -0.26193600 |
| H  | -1.32274500 | -3.61711000 | -0.53857700 |
| H  | -0.08285500 | -3.50761200 | -4.00187700 |
| H  | -0.93917300 | -4.41500000 | -2.75784900 |

|   |             |             |             |
|---|-------------|-------------|-------------|
| H | 0.80199800  | -4.15756700 | -2.59878300 |
| H | -2.58718100 | -2.61140400 | -2.34045700 |
| H | -1.83738700 | -1.63390400 | -3.61684700 |
| H | -2.06617400 | -0.95630200 | -1.98587100 |
| C | 2.59638700  | -1.58076500 | -2.33330900 |
| C | 2.99170100  | -2.36689900 | -3.58057100 |
| C | 2.88677300  | -2.42022900 | -1.08996300 |
| C | 3.44006700  | -0.30440200 | -2.28300300 |
| H | 2.93609000  | -1.75635500 | -4.48824200 |
| H | 2.39337700  | -3.27180000 | -3.72890100 |
| H | 4.03845500  | -2.68116000 | -3.46558400 |
| H | 2.58328600  | -1.90374500 | -0.16822500 |
| H | 3.96881800  | -2.60407200 | -1.03222700 |
| H | 2.38713100  | -3.39630300 | -1.12594500 |
| H | 4.50171800  | -0.57859800 | -2.35515800 |
| H | 3.29552000  | 0.24223800  | -1.34190600 |
| H | 3.21544400  | 0.37250700  | -3.11868800 |
| C | 0.47574600  | -0.16473500 | -3.85425300 |
| C | 0.23952900  | 1.22114400  | -3.98114100 |
| C | 0.54642900  | -0.93634900 | -5.02599000 |
| C | 0.14067300  | 1.77511900  | -5.26618200 |
| C | 0.03861500  | 2.18579300  | -2.86668900 |
| C | 0.41684800  | -0.37486400 | -6.28852300 |
| H | 0.71521200  | -2.00638400 | -4.95822500 |
| C | 0.22775800  | 0.99651600  | -6.41024300 |
| H | -0.03441600 | 2.84612100  | -5.35312200 |
| C | 0.93575700  | 3.24538800  | -2.69598800 |
| C | -1.12524600 | 2.15495000  | -2.08619000 |
| H | 0.47208400  | -1.00885300 | -7.17001400 |
| H | 0.13570100  | 1.45793000  | -7.39056800 |

|   |             |             |             |
|---|-------------|-------------|-------------|
| C | 0.68655300  | 4.24496400  | -1.75894900 |
| H | 1.83161600  | 3.28622100  | -3.31527900 |
| C | -1.38262800 | 3.16753700  | -1.16409100 |
| H | -1.85155900 | 1.35389000  | -2.22952000 |
| C | -0.47683400 | 4.21129400  | -0.99401800 |
| H | 1.39635700  | 5.06102300  | -1.63892300 |
| H | -2.30305400 | 3.14022900  | -0.58366100 |
| H | -0.68274200 | 5.00085200  | -0.27399800 |
| C | -2.96747800 | 1.51747200  | 1.53772200  |
| C | -2.51130000 | 0.18050500  | 1.29626200  |
| C | -3.40716700 | -0.69825200 | 0.62352600  |
| C | -4.63455600 | -0.25336400 | 0.18789900  |
| C | -5.06716600 | 1.07369900  | 0.40649500  |
| C | -4.24044400 | 1.93569100  | 1.08521700  |
| C | -2.15341900 | 2.42571800  | 2.25632500  |
| H | -3.08500100 | -1.72569500 | 0.46001800  |
| H | -5.29236300 | -0.94543100 | -0.33593500 |
| H | -6.04292300 | 1.39649700  | 0.05445300  |
| H | -4.54723400 | 2.96279800  | 1.28557000  |
| H | -2.57474200 | 3.41574300  | 2.46073000  |
| O | -1.34488900 | -0.20847000 | 1.66965800  |
| N | -0.96156800 | 2.23043800  | 2.73778800  |

**SMD-M06/6-31G(d,p)/SDD**

Electronic Energy (0K) = -2875.687439

Electronic Energy (0K) + ZPE = -2874.889909

Enthalpy (298K) = -2874.838785

Free Energy (298K) = -2874.972861

**SMD-M06/6-311+G(d,p)/SDD**

Electronic Energy (0K) = -2876.192921

## C

Number of imaginary frequencies: 0

|    |             |             |             |
|----|-------------|-------------|-------------|
| C  | -0.64687700 | 0.71091700  | 2.39785600  |
| C  | 0.40447900  | 1.11929000  | 1.37091800  |
| C  | 1.33797200  | 2.15381900  | 1.69664100  |
| C  | 2.16675500  | 2.64571200  | 0.65521000  |
| C  | 1.49746500  | 2.72751200  | 2.98913400  |
| C  | 3.09899500  | 3.64230300  | 0.88124300  |
| H  | 2.04693500  | 2.23097700  | -0.34420500 |
| C  | 2.42745700  | 3.72280300  | 3.20816700  |
| H  | 0.88664800  | 2.37532800  | 3.81287500  |
| C  | 3.23128200  | 4.17971200  | 2.15950100  |
| H  | 3.71918100  | 4.00396700  | 0.06536400  |
| H  | 2.53849800  | 4.14899500  | 4.20150400  |
| H  | 3.96416600  | 4.96185200  | 2.34422300  |
| N  | -0.11586800 | 0.28933700  | 3.68226200  |
| S  | 1.07279800  | -0.90439100 | 3.67904800  |
| O  | 1.78287200  | -0.76197100 | 4.94194400  |
| O  | 1.77499800  | -0.72698500 | 2.40553200  |
| C  | -1.07509200 | 0.21809400  | 4.78561800  |
| H  | -1.83939100 | -0.55493300 | 4.62684500  |
| H  | -1.55815100 | 1.19401900  | 4.88177800  |
| Au | 0.31266600  | 0.29848100  | -0.54179000 |
| P  | 0.58421100  | -0.90368600 | -2.61974200 |
| H  | -0.53255900 | 0.01944400  | 5.71303000  |
| C  | 0.28355100  | -2.48935900 | 3.66863300  |
| C  | -0.05615600 | -3.09457500 | 4.87519500  |
| C  | 0.01321100  | -3.10495000 | 2.44664200  |
| C  | -0.68575800 | -4.33357600 | 4.84974300  |
| H  | 0.18201100  | -2.61337900 | 5.82071000  |



|   |             |             |             |
|---|-------------|-------------|-------------|
| C | -0.61014800 | -4.34225700 | 2.44321200  |
| H | 0.29942400  | -2.62062000 | 1.51586300  |
| C | -0.97429100 | -4.97168100 | 3.64109400  |
| H | -0.95185800 | -4.81929400 | 5.78671000  |
| H | -0.81599900 | -4.83884200 | 1.49511400  |
| C | -1.66030300 | -6.30066500 | 3.61227500  |
| H | -2.66608300 | -6.21049800 | 3.18278700  |
| H | -1.76046500 | -6.72628800 | 4.61542700  |
| H | -1.11161900 | -7.01509000 | 2.98734300  |
| C | -0.52507800 | -2.44639500 | -2.57922600 |
| C | -0.52537500 | -2.98813600 | -1.14625800 |
| C | -0.13650900 | -3.59610200 | -3.50573500 |
| C | -1.93538600 | -1.95949400 | -2.91750700 |
| H | -0.79535500 | -2.21506600 | -0.41629600 |
| H | 0.44543800  | -3.40943000 | -0.86044800 |
| H | -1.27006100 | -3.79484000 | -1.07975300 |
| H | -0.18443300 | -3.33867900 | -4.56795700 |
| H | -0.85232800 | -4.41502900 | -3.34711000 |
| H | 0.86103000  | -3.99053600 | -3.28051500 |
| H | -2.64456100 | -2.78288100 | -2.75160300 |
| H | -2.02623700 | -1.64368600 | -3.96323100 |
| H | -2.24600600 | -1.12345200 | -2.27487500 |
| C | 2.43264700  | -1.30861300 | -2.73749400 |
| C | 2.88696400  | -1.94780800 | -4.04732400 |
| C | 2.81006600  | -2.22177200 | -1.57195000 |
| C | 3.15695400  | 0.03054100  | -2.58111300 |
| H | 2.76045100  | -1.27393000 | -4.90150900 |
| H | 2.37637100  | -2.89142500 | -4.26669400 |
| H | 3.96039400  | -2.16741300 | -3.96293600 |
| H | 2.46678500  | -1.82707200 | -0.60544400 |

|   |             |             |             |
|---|-------------|-------------|-------------|
| H | 3.90507700  | -2.30110400 | -1.52828200 |
| H | 2.41205300  | -3.23597300 | -1.69844700 |
| H | 4.23899100  | -0.13957000 | -2.66822300 |
| H | 2.96569600  | 0.48628100  | -1.60061300 |
| H | 2.87014900  | 0.74657100  | -3.36314100 |
| C | 0.20678200  | 0.00210100  | -4.18221400 |
| C | -0.08274300 | 1.38192800  | -4.23460300 |
| C | 0.29166100  | -0.70411800 | -5.39368400 |
| C | -0.23775500 | 1.99421200  | -5.48705900 |
| C | -0.26517200 | 2.29004500  | -3.06958800 |
| C | 0.10883600  | -0.08703600 | -6.62301500 |
| H | 0.52117600  | -1.76427400 | -5.38449500 |
| C | -0.14799600 | 1.27772300  | -6.67090500 |
| H | -0.45144600 | 3.06135800  | -5.51526000 |
| C | 0.66538400  | 3.30824000  | -2.83560800 |
| C | -1.43806600 | 2.25791400  | -2.30515100 |
| H | 0.17798300  | -0.67209700 | -7.53672100 |
| H | -0.28296000 | 1.78310800  | -7.62422300 |
| C | 0.43923200  | 4.26600400  | -1.85072500 |
| H | 1.56711400  | 3.35281800  | -3.44571400 |
| C | -1.67271600 | 3.23223100  | -1.33742200 |
| H | -2.18682000 | 1.48785400  | -2.49541300 |
| C | -0.73482600 | 4.23389100  | -1.10220600 |
| H | 1.17414300  | 5.05037400  | -1.68128100 |
| H | -2.60273600 | 3.21111200  | -0.77306400 |
| H | -0.92356500 | 4.99229900  | -0.34525100 |
| C | -3.10635200 | 1.07736600  | 1.11975700  |
| C | -2.54910800 | -0.20238900 | 1.20152600  |
| C | -3.17725900 | -1.28782800 | 0.60093700  |
| C | -4.33436700 | -1.06431400 | -0.13796900 |

|   |             |             |             |
|---|-------------|-------------|-------------|
| C | -4.88211900 | 0.21601900  | -0.26537400 |
| C | -4.27849000 | 1.28136100  | 0.38459900  |
| C | -2.48332600 | 2.09028100  | 1.93450100  |
| H | -2.75865300 | -2.28470400 | 0.71939700  |
| H | -4.82025500 | -1.90757000 | -0.62411400 |
| H | -5.78798800 | 0.36720900  | -0.84554500 |
| H | -4.70644600 | 2.28234200  | 0.34365800  |
| H | -3.00491500 | 3.04502500  | 2.05872800  |
| O | -1.42558600 | -0.41175000 | 1.92654600  |
| N | -1.38731700 | 1.93675800  | 2.58956700  |

### **SMD-M06/6-31G(d,p)/SDD**

Electronic Energy (0K) = -2875.714925

Electronic Energy (0K) + ZPE = -2874.915150

Enthalpy (298K) = -2874.864057

Free Energy (298K) = -2874.998819

### **SMD-M06/6-311+G(d,p)/SDD**

Electronic Energy (0K) = -2876.217711

### **TS<sub>C2</sub>**

Number of imaginary frequencies: 1

|   |             |            |             |
|---|-------------|------------|-------------|
| C | -0.34450100 | 0.73426300 | 2.95051200  |
| C | 0.07901300  | 1.13223400 | 1.57145000  |
| C | 0.77397300  | 2.39968700 | 1.51968600  |
| C | 0.85307000  | 3.09696000 | 0.29460900  |
| C | 1.47983400  | 2.92097900 | 2.63157900  |
| C | 1.57438800  | 4.27194500 | 0.18928000  |
| H | 0.31717900  | 2.70403300 | -0.56693800 |
| C | 2.24317300  | 4.06967600 | 2.50575900  |
| H | 1.46733200  | 2.39787000 | 3.58446900  |
| C | 2.28051000  | 4.75415900 | 1.29229200  |

|    |             |             |             |
|----|-------------|-------------|-------------|
| H  | 1.60424300  | 4.80603800  | -0.75750300 |
| H  | 2.80787200  | 4.43786600  | 3.35804500  |
| H  | 2.86794700  | 5.66495300  | 1.20324300  |
| N  | -0.14099400 | -0.53377500 | 3.46692200  |
| S  | 1.39144400  | -1.26752300 | 3.27587000  |
| O  | 2.00627300  | -1.36818800 | 4.59177300  |
| O  | 2.08845200  | -0.50086600 | 2.24824600  |
| C  | -0.81244700 | -0.85518400 | 4.73504200  |
| H  | -1.88829900 | -0.72935600 | 4.59435100  |
| H  | -0.46607100 | -0.20491900 | 5.54452600  |
| Au | 0.21787800  | 0.00201400  | -0.22812600 |
| P  | 0.93372000  | -1.24108500 | -2.18074700 |
| H  | -0.60935600 | -1.89644400 | 4.99344000  |
| C  | 0.97941800  | -2.89760000 | 2.73030700  |
| C  | -0.33100100 | -3.29718000 | 2.48119600  |
| C  | 2.04824700  | -3.78727600 | 2.61715700  |
| C  | -0.56458600 | -4.61570100 | 2.11533900  |
| H  | -1.15640800 | -2.59401800 | 2.56601500  |
| C  | 1.79215400  | -5.09276100 | 2.22354200  |
| H  | 3.06629000  | -3.46527000 | 2.83066800  |
| C  | 0.48619000  | -5.52546700 | 1.96799400  |
| H  | -1.58501900 | -4.94258800 | 1.92134400  |
| H  | 2.61800700  | -5.79407500 | 2.12059100  |
| C  | 0.21378700  | -6.92019600 | 1.50291700  |
| H  | 0.05366900  | -6.93398700 | 0.41598600  |
| H  | -0.69274500 | -7.32632000 | 1.96481000  |
| H  | 1.04938300  | -7.59200300 | 1.72245000  |
| C  | -0.04597900 | -2.87007900 | -2.28859800 |
| C  | -0.40858100 | -3.27744600 | -0.86159200 |
| C  | 0.67088600  | -4.04929600 | -2.94415300 |

|   |             |             |             |
|---|-------------|-------------|-------------|
| C | -1.34184700 | -2.56772100 | -3.04019200 |
| H | -1.00135800 | -2.50344500 | -0.35546700 |
| H | 0.47521600  | -3.48743500 | -0.24954600 |
| H | -1.01298000 | -4.19580100 | -0.89807300 |
| H | 0.87071100  | -3.90188900 | -4.00970300 |
| H | 0.01602400  | -4.92870800 | -2.86634900 |
| H | 1.61090500  | -4.29930600 | -2.43864800 |
| H | -1.97117500 | -3.46842100 | -3.02831300 |
| H | -1.17111000 | -2.29210800 | -4.08716800 |
| H | -1.91251900 | -1.76426800 | -2.55525500 |
| C | 2.79003700  | -1.49008400 | -1.82742100 |
| C | 3.62292400  | -2.14418600 | -2.92762100 |
| C | 2.93075100  | -2.31520900 | -0.54851400 |
| C | 3.34768800  | -0.08164400 | -1.58913600 |
| H | 3.69361000  | -1.52075600 | -3.82497400 |
| H | 3.25885100  | -3.13638300 | -3.21528300 |
| H | 4.64347300  | -2.27137400 | -2.54047700 |
| H | 2.31659400  | -1.92133700 | 0.27007100  |
| H | 3.97957500  | -2.27809800 | -0.22010700 |
| H | 2.67441000  | -3.36999300 | -0.70926600 |
| H | 4.43456400  | -0.15111900 | -1.44316600 |
| H | 2.91882400  | 0.38795700  | -0.69353500 |
| H | 3.16999300  | 0.58380800  | -2.44588800 |
| C | 0.89928800  | -0.51497200 | -3.88557500 |
| C | 0.49006300  | 0.79459000  | -4.22108300 |
| C | 1.41147700  | -1.32555900 | -4.91350400 |
| C | 0.67721300  | 1.24218500  | -5.53967400 |
| C | -0.22264900 | 1.75383300  | -3.34246300 |
| C | 1.56060900  | -0.87522000 | -6.21714300 |
| H | 1.72031000  | -2.34145400 | -4.69608500 |

|   |             |             |             |
|---|-------------|-------------|-------------|
| C | 1.20842000  | 0.43133600  | -6.52947700 |
| H | 0.35373900  | 2.25058200  | -5.79018900 |
| C | 0.21779400  | 3.08067300  | -3.25387800 |
| C | -1.45254800 | 1.41573500  | -2.76642800 |
| H | 1.95748400  | -1.54400400 | -6.97687700 |
| H | 1.32564100  | 0.81274400  | -7.54100400 |
| C | -0.55851400 | 4.04725900  | -2.62143900 |
| H | 1.16923400  | 3.35659000  | -3.70745200 |
| C | -2.22713700 | 2.38354600  | -2.13532100 |
| H | -1.82832900 | 0.39854400  | -2.86562300 |
| C | -1.78576000 | 3.70182200  | -2.06099700 |
| H | -0.20568600 | 5.07548800  | -2.57284600 |
| H | -3.19074600 | 2.10749800  | -1.71537300 |
| H | -2.39960100 | 4.45714000  | -1.57411900 |
| C | -2.42486500 | 3.17628900  | 2.63376300  |
| C | -2.79078200 | 2.32247900  | 1.52367000  |
| C | -4.00081600 | 2.65197600  | 0.83182300  |
| C | -4.67458700 | 3.80868100  | 1.11650700  |
| C | -4.23479300 | 4.71180000  | 2.12493900  |
| C | -3.14344000 | 4.38793400  | 2.87466400  |
| C | -1.48275000 | 2.77272600  | 3.57311600  |
| H | -4.35180200 | 1.96521700  | 0.06548000  |
| H | -5.57534700 | 4.04876200  | 0.55414500  |
| H | -4.78686600 | 5.62911700  | 2.30809700  |
| H | -2.80859900 | 5.02768300  | 3.69065500  |
| H | -1.26450900 | 3.47512600  | 4.38442900  |
| O | -2.08323600 | 1.32100100  | 1.19070300  |
| N | -0.92101700 | 1.58136500  | 3.73894300  |

**SMD-M06/6-31G(d,p)/SDD**

Electronic Energy (0K) = -2875.672115

Electronic Energy (0K) + ZPE = -2874.873514

Enthalpy (298K) = -2874.822449

Free Energy (298K) = -2874.956209

**SMD-M06/6-311+G(d,p)/SDD**

Electronic Energy (0K) = -2876.178114

**C2**

Number of imaginary frequencies: 0

|    |             |             |             |
|----|-------------|-------------|-------------|
| C  | -0.03714400 | 0.62849800  | 3.13486300  |
| C  | -0.14237500 | 0.97545000  | 1.63597600  |
| C  | 0.64566500  | 2.19781400  | 1.26801800  |
| C  | 0.13838100  | 3.13523400  | 0.35956300  |
| C  | 1.96717900  | 2.34707800  | 1.71264600  |
| C  | 0.93010200  | 4.18162400  | -0.09770000 |
| H  | -0.87831400 | 3.02546200  | -0.01603100 |
| C  | 2.75867400  | 3.39195000  | 1.24786600  |
| H  | 2.38757200  | 1.62824800  | 2.41621800  |
| C  | 2.24552500  | 4.31720600  | 0.34198700  |
| H  | 0.51304900  | 4.89379500  | -0.80779700 |
| H  | 3.78248200  | 3.48507300  | 1.60392400  |
| H  | 2.86394800  | 5.13709900  | -0.01543700 |
| N  | -0.25616200 | -0.59159900 | 3.67728700  |
| S  | 0.57239100  | -2.02801700 | 3.17196500  |
| O  | 0.88710100  | -2.74414900 | 4.39703900  |
| O  | 1.66292800  | -1.58436300 | 2.31998700  |
| C  | -0.86049200 | -0.66098400 | 5.01818300  |
| H  | -1.69288700 | 0.04550300  | 5.05526100  |
| H  | -0.12878800 | -0.42382900 | 5.79645100  |
| Au | 0.40179100  | -0.25566500 | -0.09410600 |
| P  | 1.48358000  | -1.23635100 | -2.01938500 |

|   |             |             |             |
|---|-------------|-------------|-------------|
| H | -1.24972200 | -1.66874900 | 5.17685900  |
| C | -0.67029200 | -2.93430200 | 2.29992400  |
| C | -1.67620100 | -2.29810800 | 1.57258800  |
| C | -0.52615900 | -4.32064500 | 2.28824800  |
| C | -2.53467300 | -3.07782400 | 0.80889500  |
| H | -1.80888700 | -1.21866100 | 1.60706400  |
| C | -1.39339500 | -5.07737700 | 1.51243700  |
| H | 0.25520000  | -4.80133800 | 2.87231600  |
| C | -2.40011500 | -4.47022800 | 0.75509200  |
| H | -3.33403300 | -2.59711700 | 0.24649400  |
| H | -1.29155800 | -6.16072200 | 1.49663900  |
| C | -3.31052700 | -5.28749800 | -0.10448800 |
| H | -2.93164500 | -5.33162600 | -1.13416800 |
| H | -4.31511600 | -4.85375200 | -0.14970800 |
| H | -3.38935900 | -6.31702600 | 0.25878400  |
| C | 1.55803200  | -3.13281300 | -1.84068300 |
| C | 1.64207700  | -3.45017400 | -0.34871400 |
| C | 2.71825800  | -3.85279100 | -2.52521900 |
| C | 0.22345400  | -3.66779400 | -2.36373400 |
| H | 0.80686600  | -3.00533500 | 0.20067600  |
| H | 2.57237500  | -3.09577000 | 0.10787400  |
| H | 1.59828800  | -4.54125100 | -0.21896100 |
| H | 2.71567700  | -3.76972000 | -3.61560700 |
| H | 2.63309200  | -4.92377500 | -2.29277800 |
| H | 3.69091000  | -3.51791500 | -2.14700600 |
| H | 0.16046200  | -4.74122600 | -2.13513300 |
| H | 0.11584800  | -3.54831300 | -3.44781200 |
| H | -0.63108800 | -3.17705000 | -1.87425000 |
| C | 3.19225400  | -0.40158100 | -1.99444200 |
| C | 4.13511100  | -0.75882400 | -3.14088200 |



|   |             |             |             |
|---|-------------|-------------|-------------|
| C | 3.87097800  | -0.73060100 | -0.66497700 |
| C | 2.91276300  | 1.10322100  | -2.05924400 |
| H | 3.75326100  | -0.42468100 | -4.11142200 |
| H | 4.35662600  | -1.82944100 | -3.20091800 |
| H | 5.08733200  | -0.23694400 | -2.97103100 |
| H | 3.22234400  | -0.52213200 | 0.19685800  |
| H | 4.77145600  | -0.10794100 | -0.56609700 |
| H | 4.18968700  | -1.77915700 | -0.61418500 |
| H | 3.86969600  | 1.64345400  | -2.02794500 |
| H | 2.30394400  | 1.44638400  | -1.21203000 |
| H | 2.40124400  | 1.38650200  | -2.98919100 |
| C | 0.86777700  | -0.90389500 | -3.73293600 |
| C | -0.16681800 | 0.00066800  | -4.05395900 |
| C | 1.55142500  | -1.52337700 | -4.79279500 |
| C | -0.43941500 | 0.26545900  | -5.40584700 |
| C | -1.05200500 | 0.70535900  | -3.09361000 |
| C | 1.25175500  | -1.26849500 | -6.12344300 |
| H | 2.35650300  | -2.21768300 | -4.58071500 |
| C | 0.25249200  | -0.35480300 | -6.43390200 |
| H | -1.24026900 | 0.96404900  | -5.64094200 |
| C | -1.14451800 | 2.10019700  | -3.14771000 |
| C | -1.92140500 | 0.00219200  | -2.25124500 |
| H | 1.80553300  | -1.77695800 | -6.90884700 |
| H | 0.00574000  | -0.13173000 | -7.46920400 |
| C | -2.09759200 | 2.77883900  | -2.39513900 |
| H | -0.47218400 | 2.65171600  | -3.80404700 |
| C | -2.87574500 | 0.68162200  | -1.49957800 |
| H | -1.87509700 | -1.08651900 | -2.22429600 |
| C | -2.97236300 | 2.06953700  | -1.57785600 |
| H | -2.16199600 | 3.86364900  | -2.45490200 |

|   |             |            |             |
|---|-------------|------------|-------------|
| H | -3.55766600 | 0.11991900 | -0.86242600 |
| H | -3.73013800 | 2.59939000 | -1.00449000 |
| C | -1.70965000 | 3.11153700 | 3.15090500  |
| C | -2.24789400 | 2.21693700 | 2.19147000  |
| C | -3.56752500 | 2.39107800 | 1.76576500  |
| C | -4.29629800 | 3.48711400 | 2.19084200  |
| C | -3.73836900 | 4.44042200 | 3.05618300  |
| C | -2.46343800 | 4.24461900 | 3.53362000  |
| C | -0.51377100 | 2.82674500 | 3.86809500  |
| H | -3.98811800 | 1.66407000 | 1.07630900  |
| H | -5.31481600 | 3.61524000 | 1.83203800  |
| H | -4.31585600 | 5.30777700 | 3.36194800  |
| H | -2.01779300 | 4.93677900 | 4.24510900  |
| H | -0.07347100 | 3.61304300 | 4.48530600  |
| O | -1.59132200 | 1.17878100 | 1.62192500  |
| N | 0.00700900  | 1.64023000 | 3.96326000  |

**SMD-M06/6-31G(d,p)/SDD**

Electronic Energy (0K) = -2875.706220

Electronic Energy (0K) + ZPE = -2874.906793

Enthalpy (298K) = -2874.855495

Free Energy (298K) = -2874.989684

**SMD-M06/6-311+G(d,p)/SDD**

Electronic Energy (0K) = -2876.210629

**TS<sub>D</sub>**

Number of imaginary frequencies: 1

|   |             |            |            |
|---|-------------|------------|------------|
| C | -1.75155700 | 1.18399400 | 1.20905500 |
| C | -0.34387300 | 1.17140100 | 0.72163200 |
| C | 0.70651200  | 1.96603700 | 1.32692300 |
| C | 2.03458400  | 1.49248900 | 1.23038400 |

|    |             |             |             |
|----|-------------|-------------|-------------|
| C  | 0.49548700  | 3.23901100  | 1.89579000  |
| C  | 3.09776100  | 2.23202800  | 1.71948000  |
| H  | 2.21047200  | 0.51926200  | 0.77115700  |
| C  | 1.56984800  | 4.00072800  | 2.33193200  |
| H  | -0.51526000 | 3.62127800  | 1.97974900  |
| C  | 2.86606200  | 3.49607000  | 2.26247200  |
| H  | 4.10913300  | 1.83849800  | 1.65812400  |
| H  | 1.39329400  | 4.99030200  | 2.74598400  |
| H  | 3.70075600  | 4.09153000  | 2.62543900  |
| N  | -1.35216200 | -0.06321800 | 1.98614900  |
| S  | -1.14658800 | -0.01605800 | 3.70696300  |
| O  | -2.44897200 | -0.26228000 | 4.31468300  |
| O  | -0.39278500 | 1.17962700  | 4.03842700  |
| C  | -1.75040600 | -1.38302700 | 1.47314400  |
| H  | -2.63363600 | -1.75373700 | 2.00976100  |
| H  | -0.92315800 | -2.09423700 | 1.56788500  |
| Au | 0.12528100  | 0.05460100  | -0.99035900 |
| P  | 0.71582000  | -1.32265200 | -2.84503700 |
| H  | -1.99906300 | -1.28684900 | 0.41524400  |
| C  | -0.11522800 | -1.43199800 | 3.92972300  |
| C  | -0.64326800 | -2.58947600 | 4.49042500  |
| C  | 1.21040400  | -1.36000000 | 3.50355800  |
| C  | 0.18252300  | -3.69834200 | 4.62744200  |
| H  | -1.68335100 | -2.62046200 | 4.80594500  |
| C  | 2.01360000  | -2.48154200 | 3.63941300  |
| H  | 1.60311100  | -0.44109800 | 3.07021500  |
| C  | 1.51404600  | -3.66311000 | 4.20335700  |
| H  | -0.21338600 | -4.61245900 | 5.06604000  |
| H  | 3.05039300  | -2.44578400 | 3.30874200  |
| C  | 2.40144900  | -4.85508100 | 4.37044800  |

|   |             |             |             |
|---|-------------|-------------|-------------|
| H | 3.12530500  | -4.93335100 | 3.55214000  |
| H | 1.82349600  | -5.78359500 | 4.41720100  |
| H | 2.97591700  | -4.77966600 | 5.30286400  |
| C | -0.81349700 | -2.29972700 | -3.37822900 |
| C | -1.21649300 | -3.23442800 | -2.23823200 |
| C | -0.67202400 | -3.10750100 | -4.66624200 |
| C | -1.91596100 | -1.25820400 | -3.58496900 |
| H | -1.29485300 | -2.70851000 | -1.27677200 |
| H | -0.51729200 | -4.07106700 | -2.12202300 |
| H | -2.20297800 | -3.66127900 | -2.46675000 |
| H | -0.52406800 | -2.46477200 | -5.54068500 |
| H | -1.60809100 | -3.66068200 | -4.82561200 |
| H | 0.13992900  | -3.84184500 | -4.62835300 |
| H | -2.84195400 | -1.77412700 | -3.87497700 |
| H | -1.66470900 | -0.55269100 | -4.38809700 |
| H | -2.11661900 | -0.68444400 | -2.66892900 |
| C | 2.16623400  | -2.41206600 | -2.27253200 |
| C | 2.41321500  | -3.67391900 | -3.09496100 |
| C | 1.91783700  | -2.82982800 | -0.81884900 |
| C | 3.40820600  | -1.51856400 | -2.30676200 |
| H | 2.65166100  | -3.46514600 | -4.14281900 |
| H | 1.56310800  | -4.36516800 | -3.05556100 |
| H | 3.28000800  | -4.19858900 | -2.66920900 |
| H | 1.82826700  | -1.96298400 | -0.15009500 |
| H | 2.77509500  | -3.42820400 | -0.47946300 |
| H | 1.01946300  | -3.44601700 | -0.70147800 |
| H | 4.23818400  | -2.05034800 | -1.82164200 |
| H | 3.25338500  | -0.57620700 | -1.76042100 |
| H | 3.71866000  | -1.27424700 | -3.32911300 |
| C | 1.32189200  | -0.42269400 | -4.33579300 |

|   |             |             |             |
|---|-------------|-------------|-------------|
| C | 1.45643900  | 0.98249100  | -4.39469700 |
| C | 1.78320300  | -1.18230800 | -5.42373200 |
| C | 2.07348900  | 1.55373000  | -5.51711600 |
| C | 0.98889200  | 1.95374500  | -3.36841800 |
| C | 2.37483000  | -0.59641800 | -6.53399200 |
| H | 1.68974400  | -2.26351600 | -5.40414700 |
| C | 2.53011100  | 0.78388600  | -6.57651100 |
| H | 2.17735300  | 2.63688400  | -5.55189900 |
| C | 1.92304600  | 2.74686300  | -2.69185700 |
| C | -0.37456800 | 2.19214500  | -3.15757200 |
| H | 2.71855900  | -1.21994100 | -7.35563000 |
| H | 2.99959300  | 1.26203600  | -7.43292500 |
| C | 1.50600100  | 3.74833500  | -1.81924700 |
| H | 2.98567100  | 2.57707800  | -2.86422900 |
| C | -0.79158000 | 3.20130600  | -2.29095700 |
| H | -1.11211900 | 1.59922100  | -3.69696000 |
| C | 0.14728800  | 3.98212500  | -1.62113500 |
| H | 2.24598200  | 4.35606700  | -1.30223400 |
| H | -1.85540200 | 3.38201200  | -2.14903700 |
| H | -0.17873300 | 4.77490800  | -0.95102300 |
| C | -4.44529500 | 1.38828800  | 1.58223800  |
| C | -3.93721800 | 0.70600300  | 0.47515300  |
| C | -4.74954900 | -0.06987100 | -0.33784700 |
| C | -6.09702300 | -0.17316000 | -0.00923100 |
| C | -6.62743300 | 0.49410600  | 1.09946200  |
| C | -5.80620600 | 1.28471900  | 1.88752200  |
| C | -3.50645900 | 2.24814300  | 2.26089600  |
| H | -4.32523100 | -0.58389700 | -1.19808200 |
| H | -6.74658600 | -0.78833300 | -0.62717500 |
| H | -7.68360800 | 0.39764600  | 1.33509700  |

|   |             |            |            |
|---|-------------|------------|------------|
| H | -6.19963200 | 1.82777600 | 2.74470200 |
| H | -3.89349700 | 2.99889200 | 2.95590900 |
| O | -2.61479800 | 0.84889300 | 0.15574100 |
| N | -2.23535900 | 2.21116600 | 2.07014800 |

**SMD-M06/6-31G(d,p)/SDD**

Electronic Energy (0K) = -2875.695543

Electronic Energy (0K) + ZPE = -2874.896790

Enthalpy (298K) = -2874.846288

Free Energy (298K) = -2874.979832

**SMD-M06/6-311+G(d,p)/SDD**

Electronic Energy (0K) = -2876.199823

**D**

Number of imaginary frequencies: 0

|   |             |             |            |
|---|-------------|-------------|------------|
| C | -1.74943900 | 1.21642100  | 1.44953100 |
| C | -0.34782600 | 0.93396900  | 1.12589600 |
| C | 0.77372400  | 1.78807500  | 1.61283500 |
| C | 2.04844100  | 1.21840200  | 1.73973100 |
| C | 0.63348100  | 3.16157600  | 1.82407200 |
| C | 3.14168000  | 1.98850900  | 2.11547600 |
| H | 2.17756900  | 0.15505600  | 1.53240900 |
| C | 1.73431200  | 3.93791700  | 2.17732900 |
| H | -0.34513600 | 3.62328100  | 1.72750600 |
| C | 2.98827500  | 3.35698000  | 2.33362500 |
| H | 4.11916700  | 1.52269400  | 2.22175500 |
| H | 1.60484800  | 5.00643300  | 2.33722000 |
| H | 3.84400100  | 3.96548600  | 2.61710900 |
| N | -1.03774000 | -0.03708500 | 2.13330700 |
| S | -0.83969400 | -0.00333700 | 3.94997900 |
| O | -2.19094400 | -0.22783900 | 4.43538400 |

|    |             |             |             |
|----|-------------|-------------|-------------|
| O  | -0.08683000 | 1.18503300  | 4.28645300  |
| C  | -1.43201900 | -1.38628100 | 1.67469400  |
| H  | -2.20874800 | -1.78410500 | 2.33538100  |
| H  | -0.55256600 | -2.03845100 | 1.65981900  |
| Au | 0.19129600  | 0.02129700  | -0.74048100 |
| P  | 0.86988300  | -1.27290300 | -2.62541400 |
| H  | -1.83417200 | -1.30669700 | 0.66398300  |
| C  | 0.14892900  | -1.43389600 | 4.22838200  |
| C  | -0.46505200 | -2.63153800 | 4.59132200  |
| C  | 1.53267200  | -1.32726400 | 4.08919700  |
| C  | 0.33270600  | -3.74578700 | 4.80439700  |
| H  | -1.54439800 | -2.68708600 | 4.70791900  |
| C  | 2.30763400  | -2.45734800 | 4.29970300  |
| H  | 1.99278600  | -0.37517600 | 3.83414400  |
| C  | 1.72278400  | -3.67830600 | 4.65810800  |
| H  | -0.12850500 | -4.68880400 | 5.09118400  |
| H  | 3.38934000  | -2.39377700 | 4.19717800  |
| C  | 2.57517900  | -4.87847100 | 4.91526100  |
| H  | 3.45834900  | -4.88864200 | 4.26788900  |
| H  | 2.01724700  | -5.80818400 | 4.76568500  |
| H  | 2.93518800  | -4.87595700 | 5.95229900  |
| C  | -0.63717300 | -2.26255400 | -3.20635600 |
| C  | -1.06148500 | -3.21159700 | -2.08636000 |
| C  | -0.45743100 | -3.06007600 | -4.49605800 |
| C  | -1.74595300 | -1.23178200 | -3.43356300 |
| H  | -1.17290700 | -2.69498400 | -1.12315600 |
| H  | -0.35656300 | -4.04179600 | -1.95957100 |
| H  | -2.03652000 | -3.64685400 | -2.34611100 |
| H  | -0.29466200 | -2.41039800 | -5.36262400 |
| H  | -1.38403100 | -3.62106000 | -4.68168200 |

|   |             |             |             |
|---|-------------|-------------|-------------|
| H | 0.36035400  | -3.78733700 | -4.44345600 |
| H | -2.65826100 | -1.75565700 | -3.75115000 |
| H | -1.48313500 | -0.51843500 | -4.22604700 |
| H | -1.97708900 | -0.66686200 | -2.51936000 |
| C | 2.31102100  | -2.35859300 | -2.01276200 |
| C | 2.61308600  | -3.60021500 | -2.84775300 |
| C | 2.01657400  | -2.81378700 | -0.57912100 |
| C | 3.53822400  | -1.44422300 | -1.97675900 |
| H | 2.90055300  | -3.36854800 | -3.87788600 |
| H | 1.77076300  | -4.30221000 | -2.86275000 |
| H | 3.46442300  | -4.12348500 | -2.39015400 |
| H | 1.87991800  | -1.96397600 | 0.10289200  |
| H | 2.87621400  | -3.39674600 | -0.21976200 |
| H | 1.13211500  | -3.45635500 | -0.50997700 |
| H | 4.36018300  | -1.97750500 | -1.47970100 |
| H | 3.34774300  | -0.52280200 | -1.40608200 |
| H | 3.88021000  | -1.16287800 | -2.97951000 |
| C | 1.52657800  | -0.38914300 | -4.10419600 |
| C | 1.68452100  | 1.01266900  | -4.15603100 |
| C | 2.01738000  | -1.15374400 | -5.17565700 |
| C | 2.35765900  | 1.57828700  | -5.24838300 |
| C | 1.17553500  | 1.97511000  | -3.14660700 |
| C | 2.66274400  | -0.57406900 | -6.25908400 |
| H | 1.90510000  | -2.23284700 | -5.16513100 |
| C | 2.84530000  | 0.80341700  | -6.28991800 |
| H | 2.47811700  | 2.65993800  | -5.27550500 |
| C | 2.07476500  | 2.79823800  | -2.45946400 |
| C | -0.19683000 | 2.16101600  | -2.94995100 |
| H | 3.02746600  | -1.20095800 | -7.06907500 |
| H | 3.35784200  | 1.27523100  | -7.12489900 |



|   |             |             |             |
|---|-------------|-------------|-------------|
| C | 1.61333600  | 3.78457600  | -1.59362600 |
| H | 3.14440300  | 2.66286900  | -2.61720400 |
| C | -0.65898100 | 3.15777400  | -2.09206000 |
| H | -0.90681400 | 1.54675000  | -3.50157000 |
| C | 0.24475900  | 3.97162400  | -1.41355100 |
| H | 2.32515400  | 4.41550300  | -1.06519500 |
| H | -1.73011700 | 3.30169500  | -1.96210500 |
| H | -0.11566900 | 4.75460700  | -0.74977600 |
| C | -4.40741400 | 1.42248300  | 1.98099500  |
| C | -3.96213100 | 0.71362800  | 0.86334200  |
| C | -4.81845600 | -0.05895200 | 0.09615500  |
| C | -6.15297100 | -0.12967600 | 0.48167300  |
| C | -6.62417100 | 0.56520600  | 1.60021600  |
| C | -5.75665200 | 1.34843000  | 2.34404700  |
| C | -3.42129700 | 2.23942000  | 2.63974000  |
| H | -4.44081700 | -0.59025800 | -0.77435800 |
| H | -6.83982600 | -0.73924900 | -0.10020500 |
| H | -7.67163800 | 0.49407800  | 1.87930000  |
| H | -6.10263600 | 1.90718200  | 3.21135800  |
| H | -3.75321300 | 2.96450900  | 3.38732500  |
| O | -2.64915900 | 0.82855600  | 0.48185500  |
| N | -2.15811300 | 2.17353800  | 2.39068300  |

**SMD-M06/6-31G(d,p)/SDD**

Electronic Energy (0K) = -2875.704079

Electronic Energy (0K) + ZPE = -2874.903568

Enthalpy (298K) = -2874.853034

Free Energy (298K) = -2874.986235

**SMD-M06/6-311+G(d,p)/SDD**

Electronic Energy (0K) = -2876.208457

**E**

Number of imaginary frequencies: 0

|   |             |             |            |
|---|-------------|-------------|------------|
| C | -2.25456700 | 0.25608700  | 2.38112500 |
| C | -0.86562600 | 0.06919700  | 2.18173400 |
| C | 0.16892500  | 0.99973500  | 2.74168600 |
| C | 1.48247500  | 0.86891300  | 2.26404000 |
| C | -0.08318700 | 1.92892900  | 3.75591600 |
| C | 2.50523500  | 1.66633900  | 2.75818100 |
| H | 1.69788900  | 0.11066000  | 1.51071100 |
| C | 0.94465100  | 2.72441500  | 4.25085500 |
| H | -1.08223800 | 2.02007000  | 4.17067500 |
| C | 2.23807300  | 2.60461200  | 3.75219900 |
| H | 3.51527400  | 1.54686300  | 2.37259600 |
| H | 0.73265700  | 3.43329300  | 5.04756400 |
| H | 3.03662900  | 3.22769700  | 4.14690000 |
| N | -0.42379100 | -1.29321900 | 2.09176500 |
| S | -0.51163100 | -2.19028300 | 3.54222900 |
| O | -1.23746800 | -3.42170600 | 3.25868300 |
| O | -0.96742000 | -1.25007000 | 4.55742100 |
| C | -0.54384600 | -2.07440400 | 0.87042500 |
| H | -1.57670200 | -2.38261500 | 0.65570100 |
| H | 0.07812700  | -2.97255900 | 0.94854500 |
| H | -0.15949700 | -1.47785300 | 0.03316300 |
| C | 1.17948500  | -2.60266500 | 3.86650800 |
| C | 1.66726200  | -3.84990100 | 3.49541100 |
| C | 2.00023300  | -1.64996700 | 4.46887200 |
| C | 3.00798900  | -4.13939500 | 3.72100900 |
| H | 0.99747400  | -4.58457100 | 3.05501400 |
| C | 3.33349000  | -1.95766100 | 4.68142500 |
| H | 1.59079600  | -0.68864200 | 4.77261900 |

|    |             |             |             |
|----|-------------|-------------|-------------|
| C  | 3.85758000  | -3.20218200 | 4.31013000  |
| H  | 3.40192000  | -5.11397400 | 3.43877300  |
| H  | 3.98644500  | -1.22299000 | 5.15076300  |
| C  | 5.29851100  | -3.51575700 | 4.56647200  |
| H  | 5.95345800  | -2.72166300 | 4.18951300  |
| H  | 5.60189000  | -4.45522100 | 4.09448200  |
| H  | 5.49642300  | -3.60631600 | 5.64176600  |
| C  | -4.96155700 | 0.38385600  | 2.79008100  |
| C  | -4.32953100 | -0.84221100 | 2.55872600  |
| C  | -5.02005100 | -2.04331200 | 2.55273000  |
| C  | -6.39163200 | -1.99752300 | 2.76074300  |
| C  | -7.05794400 | -0.78248900 | 2.97275000  |
| C  | -6.34842400 | 0.40393600  | 2.99461300  |
| C  | -4.10767500 | 1.53087700  | 2.79576200  |
| H  | -4.47236400 | -2.97107800 | 2.40662800  |
| H  | -6.95808300 | -2.92489400 | 2.76548500  |
| H  | -8.13199300 | -0.77819500 | 3.13184100  |
| H  | -6.84747000 | 1.35407600  | 3.17319500  |
| H  | -4.53948000 | 2.51863300  | 2.97440600  |
| O  | -2.98659600 | -0.87395000 | 2.35246600  |
| N  | -2.82393000 | 1.47329000  | 2.60188300  |
| Au | -1.04217700 | 1.16657300  | 0.16275000  |
| P  | -0.68856300 | 2.81190800  | -1.50725900 |
| C  | 1.02010900  | 2.51584000  | -2.26614900 |
| C  | 2.08095800  | 2.65765700  | -1.17575300 |
| C  | 1.37658700  | 3.42684200  | -3.43971300 |
| C  | 1.00769500  | 1.07117700  | -2.77096100 |
| H  | 1.85408600  | 2.05912700  | -0.28339600 |
| H  | 2.22567100  | 3.69917900  | -0.86555300 |
| H  | 3.04278900  | 2.30609700  | -1.57252100 |

|   |             |             |             |
|---|-------------|-------------|-------------|
| H | 0.72873700  | 3.26124900  | -4.30675000 |
| H | 2.40108800  | 3.19207800  | -3.75793200 |
| H | 1.35987900  | 4.49153200  | -3.18293000 |
| H | 1.97959100  | 0.84332400  | -3.22852000 |
| H | 0.24193500  | 0.91334500  | -3.54152700 |
| H | 0.84447100  | 0.34751200  | -1.96038700 |
| C | -0.85855700 | 4.46299900  | -0.57072600 |
| C | -0.23768000 | 5.67238700  | -1.26656000 |
| C | -0.22115600 | 4.32227500  | 0.81586000  |
| C | -2.36106800 | 4.68946100  | -0.38378700 |
| H | -0.67219300 | 5.88061500  | -2.24884100 |
| H | 0.85023300  | 5.58648000  | -1.36937700 |
| H | -0.42664800 | 6.56078800  | -0.64919900 |
| H | -0.72669100 | 3.56758800  | 1.43112800  |
| H | -0.31563300 | 5.28317500  | 1.33964000  |
| H | 0.84534400  | 4.07506200  | 0.78375900  |
| H | -2.50652500 | 5.55361500  | 0.27796700  |
| H | -2.85033400 | 3.82798300  | 0.09462500  |
| H | -2.87887500 | 4.90151000  | -1.32599200 |
| C | -1.90507100 | 2.89596800  | -2.88174700 |
| C | -3.03042600 | 2.05018100  | -2.97237300 |
| C | -1.79006500 | 3.95493500  | -3.79782100 |
| C | -4.00674600 | 2.32908400  | -3.93777100 |
| C | -3.27397400 | 0.83111700  | -2.15720200 |
| C | -2.75722500 | 4.20151400  | -4.76031400 |
| H | -0.92904500 | 4.61376100  | -3.75804400 |
| C | -3.88281900 | 3.39027700  | -4.82072200 |
| H | -4.87182100 | 1.67163700  | -3.99845000 |
| C | -4.37437900 | 0.77019700  | -1.29658900 |
| C | -2.51604900 | -0.32612400 | -2.36721900 |

|   |             |             |             |
|---|-------------|-------------|-------------|
| H | -2.63231300 | 5.02987300  | -5.45235600 |
| H | -4.65757300 | 3.57512000  | -5.56015800 |
| C | -4.71048200 | -0.42246800 | -0.66229800 |
| H | -4.98281500 | 1.66217500  | -1.14899900 |
| C | -2.85620600 | -1.51863000 | -1.73784400 |
| H | -1.67926000 | -0.29831800 | -3.06344700 |
| C | -3.95525300 | -1.56984600 | -0.88580500 |
| H | -5.58664400 | -0.46327700 | -0.01727900 |
| H | -2.27322700 | -2.41637300 | -1.93232200 |
| H | -4.23279100 | -2.50860500 | -0.41038100 |

### **SMD-M06/6-31G(d,p)/SDD**

Electronic Energy (0K) = -2875.707994

Electronic Energy (0K) + ZPE = -2874.906534

Enthalpy (298K) = -2874.854774

Free Energy (298K) = -2874.993177

### **SMD-M06/6-311+G(d,p)/SDD**

Electronic Energy (0K) = -2876.260235

### **3a-Z**

Number of imaginary frequencies: 0

|   |             |            |            |
|---|-------------|------------|------------|
| C | -0.36650200 | 0.96522500 | 2.10955200 |
| C | 0.93410600  | 1.16843300 | 2.47419700 |
| C | 1.71905800  | 2.36934300 | 2.14659200 |
| C | 2.70143900  | 2.80832900 | 3.04791200 |
| C | 1.55336500  | 3.08397900 | 0.95105200 |
| C | 3.46381400  | 3.93826100 | 2.78049500 |
| H | 2.85967200  | 2.25117200 | 3.96956600 |
| C | 2.31844200  | 4.21308300 | 0.68546300 |
| H | 0.82531200  | 2.74243800 | 0.22131200 |
| C | 3.27417000  | 4.65059400 | 1.59878400 |

|   |             |             |             |
|---|-------------|-------------|-------------|
| H | 4.21275800  | 4.26326100  | 3.49989900  |
| H | 2.17540800  | 4.74735400  | -0.25172600 |
| H | 3.87415500  | 5.53276400  | 1.38629100  |
| N | 1.56655800  | 0.20694100  | 3.31827400  |
| S | 2.55047800  | -0.94638800 | 2.60779000  |
| O | 3.36990400  | -1.50537900 | 3.67846700  |
| O | 3.17334800  | -0.32017300 | 1.44886200  |
| C | 1.00895800  | -0.11959500 | 4.63052300  |
| H | 0.25301100  | -0.91631000 | 4.59136200  |
| H | 0.53970600  | 0.78705100  | 5.02365100  |
| H | 1.81579700  | -0.41361400 | 5.30689700  |
| C | 1.47866500  | -2.23419900 | 2.02166700  |
| C | 1.14357500  | -3.28776100 | 2.86676200  |
| C | 0.94127700  | -2.14052400 | 0.73775500  |
| C | 0.26170000  | -4.26355900 | 2.41236700  |
| H | 1.58288700  | -3.35371700 | 3.85950200  |
| C | 0.06087900  | -3.11976900 | 0.30414800  |
| H | 1.22094100  | -1.31424300 | 0.08828300  |
| C | -0.29245400 | -4.19286300 | 1.13233500  |
| H | 0.00150900  | -5.09799800 | 3.06171700  |
| H | -0.36254800 | -3.05951300 | -0.69765100 |
| C | -1.26005000 | -5.22621200 | 0.64710000  |
| H | -2.23692100 | -4.77403100 | 0.43147100  |
| H | -1.40925600 | -6.02063800 | 1.38507500  |
| H | -0.91368500 | -5.68733100 | -0.28581400 |
| C | -2.92134300 | 0.31941000  | 1.31062900  |
| C | -2.16428800 | -0.58233000 | 2.06467300  |
| C | -2.65253900 | -1.83879400 | 2.39371900  |
| C | -3.92204100 | -2.19108500 | 1.94672900  |
| C | -4.69560300 | -1.30706000 | 1.18857200  |

|   |             |             |            |
|---|-------------|-------------|------------|
| C | -4.19602600 | -0.05200700 | 0.87446100 |
| C | -2.31236000 | 1.60281900  | 1.06827200 |
| H | -2.03558800 | -2.51736200 | 2.97985500 |
| H | -4.31605400 | -3.17380800 | 2.19565300 |
| H | -5.68519600 | -1.60303100 | 0.85143800 |
| H | -4.78059400 | 0.65726200  | 0.29110800 |
| H | -2.89105700 | 2.36954900  | 0.54668400 |
| O | -0.92786700 | -0.23312000 | 2.50350000 |
| N | -1.11437800 | 1.90235500  | 1.44475000 |

**SMD-M06/6-31G(d,p)/SDD**

Electronic Energy (0K) = -1620.931400

Electronic Energy (0K) + ZPE = -1620.549142

Enthalpy (298K) = -1620.523232

Free Energy (298K) = -1620.605115

**SMD-M06/6-311+G(d,p)/SDD**

Electronic Energy (0K) = -1621.247929

**TS<sub>A1</sub>**

Number of imaginary frequencies: 1

|   |             |            |             |
|---|-------------|------------|-------------|
| C | -4.21451700 | 2.56344000 | -2.76048700 |
| C | -3.06248300 | 2.81168400 | -3.32745900 |
| C | -2.19038500 | 3.95551900 | -3.05702100 |
| C | -1.59110200 | 4.69216500 | -4.08793100 |
| C | -1.91006000 | 4.29969200 | -1.72482400 |
| C | -0.78348100 | 5.78483600 | -3.79385100 |
| H | -1.78291500 | 4.41001600 | -5.12235700 |
| C | -1.07989100 | 5.37630500 | -1.43711400 |
| H | -2.35139100 | 3.71221400 | -0.92091800 |
| C | -0.52595500 | 6.13072300 | -2.46887700 |
| H | -0.34138600 | 6.36118700 | -4.60356800 |

|    |             |             |             |
|----|-------------|-------------|-------------|
| H  | -0.86820100 | 5.63011900  | -0.40079400 |
| H  | 0.11646000  | 6.97825500  | -2.24118100 |
| N  | -5.07378100 | 1.61732200  | -2.41624800 |
| S  | -4.68619000 | 0.70320600  | -0.99222700 |
| O  | -5.95499200 | 0.14943200  | -0.54638400 |
| O  | -3.90971500 | 1.60344500  | -0.15544100 |
| C  | -6.33952900 | 1.38460200  | -3.11664900 |
| H  | -6.61259700 | 2.31302900  | -3.62708700 |
| H  | -7.12412300 | 1.12351300  | -2.40415100 |
| Au | -2.66704500 | 1.49237300  | -4.94050100 |
| P  | -1.93295500 | 0.19597900  | -6.81166700 |
| H  | -6.21734800 | 0.58359000  | -3.85845300 |
| C  | -3.63307700 | -0.60220600 | -1.53475200 |
| C  | -4.19142000 | -1.84263200 | -1.84177700 |
| C  | -2.25834100 | -0.37881300 | -1.60374500 |
| C  | -3.34628300 | -2.87702500 | -2.21421200 |
| H  | -5.26510800 | -1.99682400 | -1.76440800 |
| C  | -1.43297500 | -1.42903500 | -1.98650500 |
| H  | -1.84025000 | 0.58919800  | -1.33599900 |
| C  | -1.96122400 | -2.68564800 | -2.29683400 |
| H  | -3.76337100 | -3.85556000 | -2.44774800 |
| H  | -0.35642200 | -1.27388000 | -2.03929500 |
| C  | -1.07452200 | -3.80067200 | -2.75197700 |
| H  | -1.21521900 | -3.98838900 | -3.82669400 |
| H  | -1.31078400 | -4.73722900 | -2.23404000 |
| H  | -0.01710900 | -3.56969200 | -2.58848700 |
| C  | -2.72861100 | -1.52887500 | -6.84000500 |
| C  | -3.02998000 | -1.91302800 | -5.39259100 |
| C  | -1.87461800 | -2.62691200 | -7.46880200 |
| C  | -4.05423700 | -1.41746100 | -7.59070000 |



|   |             |             |              |
|---|-------------|-------------|--------------|
| H | -3.74508700 | -1.21934600 | -4.92843200  |
| H | -2.12829700 | -1.93133200 | -4.77175900  |
| H | -3.47203500 | -2.92025800 | -5.37365500  |
| H | -1.62251800 | -2.42891500 | -8.51656900  |
| H | -2.44992000 | -3.56318300 | -7.44729000  |
| H | -0.94698800 | -2.80217900 | -6.91054400  |
| H | -4.57579500 | -2.38197800 | -7.52116900  |
| H | -3.92240800 | -1.18247500 | -8.65306300  |
| H | -4.70972900 | -0.65898800 | -7.14256100  |
| C | -0.04692600 | 0.16296900  | -6.56942800  |
| C | 0.78687100  | -0.48634000 | -7.67227300  |
| C | 0.23951500  | -0.53830800 | -5.23955100  |
| C | 0.38038200  | 1.63112000  | -6.45860100  |
| H | 0.75127000  | 0.08392400  | -8.60633800  |
| H | 0.50284100  | -1.52244200 | -7.88087600  |
| H | 1.83448700  | -0.49453600 | -7.34095100  |
| H | -0.33752200 | -0.09897800 | -4.41399500  |
| H | 1.30634200  | -0.42118300 | -5.00323300  |
| H | 0.02657500  | -1.61470300 | -5.27860400  |
| H | 1.47358400  | 1.67339400  | -6.35562200  |
| H | -0.05863700 | 2.12222900  | -5.57980600  |
| H | 0.10838900  | 2.21073100  | -7.35155600  |
| C | -2.20550600 | 0.93471300  | -8.47968100  |
| C | -2.89122400 | 2.15004400  | -8.69648900  |
| C | -1.63044500 | 0.28858100  | -9.58626800  |
| C | -2.89426600 | 2.70262300  | -9.98528000  |
| C | -3.70050500 | 2.88584600  | -7.68853500  |
| C | -1.67312600 | 0.83440100  | -10.86175500 |
| H | -1.13026500 | -0.66620200 | -9.45298600  |
| C | -2.28920400 | 2.06472800  | -11.05814300 |

|   |             |            |              |
|---|-------------|------------|--------------|
| H | -3.41724200 | 3.64488200 | -10.14062100 |
| C | -3.36879900 | 4.19534100 | -7.32849800  |
| C | -4.89882300 | 2.33999500 | -7.21175900  |
| H | -1.21817200 | 0.30193700 | -11.69328800 |
| H | -2.31806700 | 2.51732800 | -12.04645700 |
| C | -4.20374000 | 4.93460800 | -6.49292100  |
| H | -2.44806900 | 4.63552900 | -7.71210700  |
| C | -5.73869100 | 3.08208000 | -6.38833400  |
| H | -5.18639500 | 1.33636300 | -7.52112800  |
| C | -5.39146900 | 4.38124500 | -6.02217100  |
| H | -3.92636600 | 5.95043700 | -6.21687600  |
| H | -6.67487300 | 2.64771200 | -6.04250700  |
| H | -6.05200800 | 4.96369300 | -5.38225300  |
| C | -6.11744900 | 6.02547300 | -1.53844800  |
| C | -6.72132300 | 4.96077900 | -0.86535100  |
| C | -7.86335900 | 5.09138200 | -0.08417100  |
| C | -8.38695400 | 6.37174100 | -0.00964300  |
| C | -7.79982000 | 7.46613500 | -0.67811200  |
| C | -6.66331000 | 7.31428200 | -1.44799400  |
| C | -5.00536700 | 5.41949500 | -2.18331800  |
| H | -8.30828100 | 4.24527500 | 0.42970400   |
| H | -9.28090100 | 6.53982100 | 0.58584900   |
| H | -8.25533900 | 8.44773800 | -0.57921400  |
| H | -6.20619900 | 8.15504600 | -1.96165000  |
| H | -4.24500000 | 5.85833200 | -2.82186700  |
| O | -6.02670900 | 3.82036800 | -1.08957500  |
| N | -4.95936800 | 4.14404000 | -1.90042400  |

**SMD-M06/6-31G(d,p)/SDD**

Electronic Energy (0K) = -2875.656972

Electronic Energy (0K) + ZPE = -2874.859452

Enthalpy (298K) = -2874.807888

Free Energy (298K) = -2874.945023

**SMD-M06/6-311+G(d,p)/SDD**

Electronic Energy (0K) = -2876.165333

**A1**

Number of imaginary frequencies: 0

|    |             |             |             |
|----|-------------|-------------|-------------|
| C  | -1.45237100 | 0.93653200  | 1.65465700  |
| C  | -0.24974600 | 1.00687300  | 1.04325600  |
| C  | 0.61985500  | 2.17612400  | 1.27611200  |
| C  | 1.25912800  | 2.85640700  | 0.22958800  |
| C  | 0.87005200  | 2.59508800  | 2.59474400  |
| C  | 2.08313500  | 3.94575400  | 0.48895800  |
| H  | 1.09204600  | 2.52725600  | -0.79572600 |
| C  | 1.71552100  | 3.66808100  | 2.85151800  |
| H  | 0.40591100  | 2.05688200  | 3.42163100  |
| C  | 2.31778900  | 4.35434600  | 1.79998600  |
| H  | 2.55635400  | 4.47065000  | -0.33829000 |
| H  | 1.90388800  | 3.96922800  | 3.87975500  |
| H  | 2.97573700  | 5.19649500  | 2.00164300  |
| N  | -2.29346700 | -0.18060900 | 1.82190100  |
| S  | -2.00937800 | -1.15449900 | 3.17376900  |
| O  | -3.27744300 | -1.82195700 | 3.44599700  |
| O  | -1.39405400 | -0.28269900 | 4.16597900  |
| C  | -2.96672200 | -0.77562800 | 0.67039600  |
| H  | -3.51772500 | 0.01247000  | 0.14601000  |
| H  | -3.68423600 | -1.52443300 | 1.01600300  |
| Au | 0.39105600  | -0.34865100 | -0.42779100 |
| P  | 1.43969700  | -1.59324800 | -2.21525100 |
| H  | -2.24847200 | -1.23610300 | -0.02711100 |

|   |             |             |             |
|---|-------------|-------------|-------------|
| C | -0.82458900 | -2.40992400 | 2.77169200  |
| C | -1.26710700 | -3.69227800 | 2.45172400  |
| C | 0.53524300  | -2.11608000 | 2.86951300  |
| C | -0.32874700 | -4.69230000 | 2.23933200  |
| H | -2.33216600 | -3.90476000 | 2.39948300  |
| C | 1.45811200  | -3.13132300 | 2.65104500  |
| H | 0.86506600  | -1.11556800 | 3.14199500  |
| C | 1.04202300  | -4.42955700 | 2.34002000  |
| H | -0.66103300 | -5.70044300 | 1.99497800  |
| H | 2.52297000  | -2.91697800 | 2.73262500  |
| C | 2.03721500  | -5.52445100 | 2.11733300  |
| H | 1.77787800  | -6.12118200 | 1.23428500  |
| H | 2.05979400  | -6.21355300 | 2.97135800  |
| H | 3.04961400  | -5.12872500 | 1.98440000  |
| C | 0.78733400  | -3.37465600 | -2.31058800 |
| C | 0.46749600  | -3.82567300 | -0.88664200 |
| C | 1.73193000  | -4.39768500 | -2.93602300 |
| C | -0.51976900 | -3.32900800 | -3.10148400 |
| H | -0.25099000 | -3.15479500 | -0.39657300 |
| H | 1.36203600  | -3.88156900 | -0.25769500 |
| H | 0.02349000  | -4.83135500 | -0.92360700 |
| H | 1.96631000  | -4.18626900 | -3.98433700 |
| H | 1.23719400  | -5.37882000 | -2.91264100 |
| H | 2.66855000  | -4.49339200 | -2.37471100 |
| H | -0.96652400 | -4.33279600 | -3.09822400 |
| H | -0.37202200 | -3.03145400 | -4.14642100 |
| H | -1.24650200 | -2.64548400 | -2.64161700 |
| C | 3.28584800  | -1.48633900 | -1.76057300 |
| C | 4.28990800  | -2.03709700 | -2.77120800 |
| C | 3.48492000  | -2.20185900 | -0.42335400 |

|   |             |             |             |
|---|-------------|-------------|-------------|
| C | 3.57625100  | 0.00743400  | -1.57622400 |
| H | 4.32472700  | -1.43905800 | -3.68778600 |
| H | 4.11017000  | -3.08318000 | -3.03964200 |
| H | 5.28821500  | -1.98374200 | -2.31478800 |
| H | 2.75828400  | -1.87271500 | 0.33247400  |
| H | 4.49026800  | -1.96834400 | -0.04560800 |
| H | 3.41682400  | -3.29257100 | -0.52559200 |
| H | 4.65120200  | 0.13880900  | -1.38958900 |
| H | 3.03313900  | 0.42764700  | -0.71978700 |
| H | 3.32058400  | 0.59422100  | -2.47000000 |
| C | 1.33599000  | -0.91324700 | -3.93208900 |
| C | 0.62169500  | 0.25190000  | -4.28779500 |
| C | 2.08176700  | -1.55988900 | -4.93222500 |
| C | 0.74664300  | 0.75059800  | -5.59354400 |
| C | -0.33818200 | 0.99525200  | -3.42966200 |
| C | 2.16753700  | -1.06970900 | -6.22788000 |
| H | 2.62626600  | -2.46803800 | -4.69651700 |
| C | 1.51039900  | 0.10926500  | -6.55664700 |
| H | 0.19649500  | 1.65312900  | -5.85438600 |
| C | -0.12687700 | 2.34861100  | -3.14838600 |
| C | -1.55219400 | 0.41006400  | -3.05047300 |
| H | 2.75433400  | -1.60522900 | -6.97016400 |
| H | 1.57653100  | 0.51948600  | -7.56152300 |
| C | -1.10246000 | 3.09922200  | -2.49669200 |
| H | 0.80883900  | 2.81580500  | -3.45544800 |
| C | -2.53369700 | 1.16332300  | -2.41450100 |
| H | -1.73973600 | -0.63383800 | -3.29822800 |
| C | -2.31170400 | 2.51084500  | -2.13520200 |
| H | -0.92027300 | 4.15141000  | -2.28486800 |
| H | -3.48302300 | 0.69964200  | -2.15354700 |

|   |             |            |             |
|---|-------------|------------|-------------|
| H | -3.08870500 | 3.10392200 | -1.65618200 |
| C | -2.77390300 | 4.22502600 | 2.49328100  |
| C | -2.94592600 | 3.46065000 | 3.65569000  |
| C | -3.49839300 | 3.95704300 | 4.82869100  |
| C | -3.86888700 | 5.29000700 | 4.78456300  |
| C | -3.70718500 | 6.08768400 | 3.62947900  |
| C | -3.16495600 | 5.57509300 | 2.47151200  |
| C | -2.21654300 | 3.32340900 | 1.56867600  |
| H | -3.62140600 | 3.33983700 | 5.71235400  |
| H | -4.30202200 | 5.74146100 | 5.67342500  |
| H | -4.02154800 | 7.12683200 | 3.66293100  |
| H | -3.03926000 | 6.17959500 | 1.57861600  |
| H | -1.92248300 | 3.44903100 | 0.53165100  |
| O | -2.50919200 | 2.19642800 | 3.46027900  |
| N | -2.06225000 | 2.15339800 | 2.15382900  |

#### **SMD-M06/6-31G(d,p)/SDD**

Electronic Energy (0K) = -2875.675517

Electronic Energy (0K) + ZPE = -2874.876301

Enthalpy (298K) = -2874.824683

Free Energy (298K) = -2874.962954

#### **SMD-M06/6-311+G(d,p)/SDD**

Electronic Energy (0K) = -2876.183068

#### **TS<sub>B1</sub>**

Number of imaginary frequencies: 1

|   |             |            |            |
|---|-------------|------------|------------|
| C | -1.23922600 | 0.86961500 | 1.63374100 |
| C | -0.02862700 | 1.23449000 | 1.03906200 |
| C | 0.60315300  | 2.50204300 | 1.32552900 |
| C | 1.46355600  | 3.09016500 | 0.37547200 |
| C | 0.44163900  | 3.14587500 | 2.57353900 |

|    |             |             |             |
|----|-------------|-------------|-------------|
| C  | 2.08414200  | 4.30191500  | 0.63193800  |
| H  | 1.61230600  | 2.58311100  | -0.57776300 |
| C  | 1.09237200  | 4.34011200  | 2.83766600  |
| H  | -0.16656100 | 2.67666400  | 3.34402600  |
| C  | 1.90143600  | 4.92765300  | 1.86480600  |
| H  | 2.72538700  | 4.75377600  | -0.12115600 |
| H  | 0.97407200  | 4.81648200  | 3.80767100  |
| H  | 2.40499600  | 5.86843000  | 2.07523500  |
| N  | -1.59812400 | -0.48101800 | 1.83021300  |
| S  | -1.11512200 | -1.11312400 | 3.34044600  |
| O  | -2.31725800 | -1.49884000 | 4.07125700  |
| O  | -0.17752300 | -0.14503800 | 3.89756600  |
| C  | -2.89121900 | -0.93612200 | 1.32081800  |
| H  | -3.73941500 | -0.47656200 | 1.84408000  |
| H  | -2.96221900 | -2.02404900 | 1.41588500  |
| Au | 0.61808900  | -0.04213600 | -0.48521800 |
| P  | 1.39850900  | -1.50878000 | -2.23287700 |
| H  | -2.93384300 | -0.68652300 | 0.25358800  |
| C  | -0.21913100 | -2.58445900 | 2.93825300  |
| C  | -0.89535300 | -3.79629800 | 2.81837300  |
| C  | 1.16124600  | -2.50173200 | 2.76673400  |
| C  | -0.17230000 | -4.93554400 | 2.48924900  |
| H  | -1.96724800 | -3.84960500 | 2.99412500  |
| C  | 1.86656500  | -3.65498000 | 2.45184700  |
| H  | 1.67409200  | -1.55074400 | 2.89348900  |
| C  | 1.21049500  | -4.87957700 | 2.28765100  |
| H  | -0.68820300 | -5.88867300 | 2.38566900  |
| H  | 2.94696100  | -3.60623400 | 2.32143500  |
| C  | 1.96521700  | -6.09100000 | 1.84170000  |
| H  | 1.98652800  | -6.13552100 | 0.74268300  |

|   |             |             |             |
|---|-------------|-------------|-------------|
| H | 1.49538200  | -7.01526000 | 2.19365000  |
| H | 3.00461000  | -6.07146300 | 2.18584300  |
| C | 0.41694000  | -3.13695500 | -2.18865100 |
| C | 0.02561600  | -3.41502700 | -0.73661000 |
| C | 1.15186200  | -4.36191100 | -2.72757900 |
| C | -0.86725900 | -2.90864600 | -2.98654800 |
| H | -0.58057000 | -2.60080000 | -0.31526100 |
| H | 0.89508500  | -3.56195600 | -0.08597500 |
| H | -0.57315200 | -4.33695800 | -0.70673000 |
| H | 1.42121300  | -4.27748700 | -3.78558500 |
| H | 0.48301500  | -5.22943700 | -2.63759300 |
| H | 2.05685300  | -4.58854000 | -2.15149400 |
| H | -1.49908500 | -3.80284000 | -2.89478300 |
| H | -0.68108900 | -2.73810800 | -4.05302100 |
| H | -1.44327600 | -2.05961200 | -2.59228300 |
| C | 3.24918700  | -1.71308300 | -1.86031600 |
| C | 4.07815800  | -2.50544900 | -2.86814100 |
| C | 3.37725800  | -2.36150800 | -0.48230200 |
| C | 3.80750000  | -0.28728500 | -1.79936700 |
| H | 4.14796300  | -1.99865800 | -3.83638900 |
| H | 3.70764300  | -3.52315500 | -3.02930800 |
| H | 5.10019200  | -2.58797300 | -2.47290300 |
| H | 2.78293900  | -1.83501700 | 0.27741900  |
| H | 4.43046400  | -2.32566100 | -0.16976500 |
| H | 3.07091800  | -3.41566000 | -0.49168600 |
| H | 4.88817500  | -0.33722700 | -1.60654700 |
| H | 3.34754700  | 0.29973000  | -0.99259200 |
| H | 3.66376600  | 0.25296400  | -2.74530000 |
| C | 1.33139100  | -0.90169300 | -3.97655800 |
| C | 0.86485100  | 0.37618900  | -4.35519200 |



|   |             |             |             |
|---|-------------|-------------|-------------|
| C | 1.85871200  | -1.73656100 | -4.97594300 |
| C | 1.01417500  | 0.78186300  | -5.69016300 |
| C | 0.15220600  | 1.34338500  | -3.48102500 |
| C | 1.96923000  | -1.32966700 | -6.29824100 |
| H | 2.20240800  | -2.73356500 | -4.71978100 |
| C | 1.56211200  | -0.04990800 | -6.65466200 |
| H | 0.65669100  | 1.77090500  | -5.97138000 |
| C | 0.65390900  | 2.63889500  | -3.31500800 |
| C | -1.10555800 | 1.03478600  | -2.94848900 |
| H | 2.37992600  | -2.01002300 | -7.04015900 |
| H | 1.65331200  | 0.29499200  | -7.68186300 |
| C | -0.08206900 | 3.60400900  | -2.63345200 |
| H | 1.62573200  | 2.88997400  | -3.73918600 |
| C | -1.84600000 | 2.00278200  | -2.27437100 |
| H | -1.51951000 | 0.03877500  | -3.10053500 |
| C | -1.33705300 | 3.29051400  | -2.11751300 |
| H | 0.32214100  | 4.60738700  | -2.51529900 |
| H | -2.83256400 | 1.75175300  | -1.88680300 |
| H | -1.92273600 | 4.05311600  | -1.60637000 |
| C | -3.32230800 | 3.71939700  | 2.37106600  |
| C | -3.22368000 | 3.12699400  | 3.66170600  |
| C | -3.87524000 | 3.73400000  | 4.75391400  |
| C | -4.55067100 | 4.91303600  | 4.52087900  |
| C | -4.63895100 | 5.50833700  | 3.23923100  |
| C | -4.03713800 | 4.91523200  | 2.15741100  |
| C | -2.68816000 | 2.86545100  | 1.46431400  |
| H | -3.81610000 | 3.28618300  | 5.74106100  |
| H | -5.04008400 | 5.40632000  | 5.35799400  |
| H | -5.19404100 | 6.43411700  | 3.11946500  |
| H | -4.09922500 | 5.34387300  | 1.16038500  |

|   |             |            |            |
|---|-------------|------------|------------|
| H | -2.64160700 | 2.99363800 | 0.38286600 |
| O | -2.53253200 | 2.02960900 | 3.71297700 |
| N | -2.15341800 | 1.79062000 | 1.98610500 |

**SMD-M06/6-31G(d,p)/SDD**

Electronic Energy (0K) = -2875.658790

Electronic Energy (0K) + ZPE = -2874.861908

Enthalpy (298K) = -2874.810507

Free Energy (298K) = -2874.946405

**SMD-M06/6-311+G(d,p)/SDD**

Electronic Energy (0K) = -2876.166077

**B1**

Number of imaginary frequencies: 0

|   |             |             |            |
|---|-------------|-------------|------------|
| C | -1.28862000 | 0.23238800  | 1.85943700 |
| C | -0.01422200 | 0.88565600  | 1.51990900 |
| C | 0.36740400  | 2.10760100  | 2.09975300 |
| C | 1.61467500  | 2.67158100  | 1.72209700 |
| C | -0.42836400 | 2.77203900  | 3.07469000 |
| C | 2.06017500  | 3.84072200  | 2.30514500 |
| H | 2.21331600  | 2.14036500  | 0.98298700 |
| C | 0.01209000  | 3.95664400  | 3.62486800 |
| H | -1.40152000 | 2.36488300  | 3.35296800 |
| C | 1.25399300  | 4.48298200  | 3.24797400 |
| H | 3.02100000  | 4.26490000  | 2.02664100 |
| H | -0.59813700 | 4.47876300  | 4.35635600 |
| H | 1.59693200  | 5.41149300  | 3.69894100 |
| N | -1.31656700 | -1.02202500 | 2.44378500 |
| S | -0.20493800 | -1.43056600 | 3.67595600 |
| O | -0.99155800 | -1.75265600 | 4.85499400 |
| O | 0.75847000  | -0.33555000 | 3.68875800 |

|    |             |             |             |
|----|-------------|-------------|-------------|
| C  | -2.57129900 | -1.77548300 | 2.40852900  |
| H  | -3.31021600 | -1.36388200 | 3.10313300  |
| H  | -2.36912700 | -2.81942700 | 2.66033000  |
| Au | 0.73498500  | 0.00203500  | -0.20372300 |
| P  | 1.16891200  | -1.32797700 | -2.16100800 |
| H  | -2.96525000 | -1.74045300 | 1.38926200  |
| C  | 0.59800300  | -2.89602200 | 3.11184200  |
| C  | -0.00680900 | -4.13694100 | 3.30647100  |
| C  | 1.86066500  | -2.78322500 | 2.53080200  |
| C  | 0.65529700  | -5.27746600 | 2.87146600  |
| H  | -0.96731400 | -4.21760500 | 3.80978100  |
| C  | 2.51509400  | -3.93898900 | 2.13193400  |
| H  | 2.32698800  | -1.80718800 | 2.41181000  |
| C  | 1.92020800  | -5.19719700 | 2.28120600  |
| H  | 0.19040300  | -6.25185400 | 3.00872300  |
| H  | 3.50982700  | -3.86946200 | 1.69361300  |
| C  | 2.64504900  | -6.42520800 | 1.83161700  |
| H  | 3.04781200  | -6.29604900 | 0.81971800  |
| H  | 1.99384100  | -7.30445600 | 1.83621100  |
| H  | 3.49845100  | -6.63560400 | 2.48856000  |
| C  | -0.10349400 | -2.74413800 | -1.99590400 |
| C  | -0.18773400 | -3.16889200 | -0.52374500 |
| C  | 0.18161100  | -3.99667900 | -2.82190900 |
| C  | -1.45748400 | -2.15148200 | -2.39356500 |
| H  | -0.51650500 | -2.34754600 | 0.12755900  |
| H  | 0.76168100  | -3.55305200 | -0.13315700 |
| H  | -0.93048600 | -3.97526600 | -0.44066600 |
| H  | 0.21345000  | -3.81329100 | -3.89983500 |
| H  | -0.63260000 | -4.71357300 | -2.64656800 |
| H  | 1.11497600  | -4.48540200 | -2.51879200 |

|   |             |             |             |
|---|-------------|-------------|-------------|
| H | -2.24489300 | -2.87615000 | -2.14486000 |
| H | -1.52548200 | -1.93759600 | -3.46631200 |
| H | -1.67708400 | -1.22318800 | -1.84300300 |
| C | 2.96044400  | -1.92281700 | -2.23471000 |
| C | 3.33689100  | -2.69561700 | -3.49577200 |
| C | 3.23188400  | -2.78421800 | -1.00521200 |
| C | 3.82684400  | -0.66491900 | -2.16254700 |
| H | 3.26357300  | -2.07654300 | -4.39651500 |
| H | 2.73719000  | -3.60055200 | -3.64005300 |
| H | 4.38605600  | -3.00847600 | -3.40155100 |
| H | 2.95425000  | -2.26835400 | -0.07694000 |
| H | 4.30792600  | -3.00289600 | -0.95744600 |
| H | 2.70152000  | -3.74404600 | -1.04407700 |
| H | 4.88363200  | -0.96489400 | -2.15099600 |
| H | 3.63139600  | -0.07830900 | -1.25423400 |
| H | 3.67711300  | -0.01923700 | -3.03735600 |
| C | 0.81254300  | -0.51163700 | -3.77569900 |
| C | 0.46138800  | 0.85044300  | -3.90327500 |
| C | 0.77432600  | -1.31867900 | -4.92506000 |
| C | 0.03769300  | 1.32286800  | -5.15435200 |
| C | 0.54320700  | 1.88908600  | -2.84059000 |
| C | 0.37314600  | -0.82710500 | -6.15907500 |
| H | 1.05443500  | -2.36488900 | -4.85987000 |
| C | -0.01433600 | 0.50261000  | -6.27118400 |
| H | -0.23410700 | 2.37325600  | -5.24335200 |
| C | 1.78459100  | 2.34916000  | -2.38388500 |
| C | -0.61497900 | 2.55667800  | -2.42440000 |
| H | 0.35679600  | -1.48610500 | -7.02358000 |
| H | -0.34407600 | 0.90473200  | -7.22607600 |
| C | 1.86424100  | 3.44495600  | -1.53038100 |

|   |             |            |             |
|---|-------------|------------|-------------|
| H | 2.69349600  | 1.86125800 | -2.73024400 |
| C | -0.53434400 | 3.65161900 | -1.56685800 |
| H | -1.58313100 | 2.22124100 | -2.79872200 |
| C | 0.70475400  | 4.10059200 | -1.12070900 |
| H | 2.83794100  | 3.79850400 | -1.19523500 |
| H | -1.44262400 | 4.16508200 | -1.25622300 |
| H | 0.76748200  | 4.96440600 | -0.46231800 |
| C | -3.55049800 | 2.76511500 | 0.81346400  |
| C | -4.04043200 | 3.06825200 | 2.17160100  |
| C | -4.96967700 | 4.18095100 | 2.25929500  |
| C | -5.32341400 | 4.90996600 | 1.16699600  |
| C | -4.82008400 | 4.61191000 | -0.14065500 |
| C | -3.96560400 | 3.56847400 | -0.30219900 |
| C | -2.71661800 | 1.69308500 | 0.57453100  |
| H | -5.35610000 | 4.41384600 | 3.24953800  |
| H | -6.01190700 | 5.74617000 | 1.28150000  |
| H | -5.13660200 | 5.21199000 | -0.98937500 |
| H | -3.58789500 | 3.30438400 | -1.29098200 |
| H | -2.36595200 | 1.53532600 | -0.45531800 |
| O | -3.68480400 | 2.42870700 | 3.17511500  |
| N | -2.39286600 | 0.74482200 | 1.45900800  |

**SMD-M06/6-31G(d,p)/SDD**

Electronic Energy (0K) = -2875.684357

Electronic Energy (0K) + ZPE = -2874.886242

Enthalpy (298K) = -2874.833980

Free Energy (298K) = -2874.971876

**SMD-M06/6-311+G(d,p)/SDD**

Electronic Energy (0K) = -2876.195338

**TS<sub>C1</sub>**

Number of imaginary frequencies: 1

|    |             |             |             |
|----|-------------|-------------|-------------|
| C  | -1.43204000 | 0.70870900  | 1.37487100  |
| C  | -0.05130200 | 1.20530200  | 1.15456700  |
| C  | 0.50455300  | 2.43741300  | 1.55895200  |
| C  | 1.90839700  | 2.58945700  | 1.38703900  |
| C  | -0.22892800 | 3.52377600  | 2.10423200  |
| C  | 2.55536000  | 3.73425700  | 1.80619700  |
| H  | 2.46726000  | 1.76328100  | 0.94812400  |
| C  | 0.42094100  | 4.68802600  | 2.46632000  |
| H  | -1.30274600 | 3.44103200  | 2.20304900  |
| C  | 1.80864300  | 4.78691000  | 2.34016500  |
| H  | 3.63275100  | 3.82513400  | 1.70039700  |
| H  | -0.14878400 | 5.52510100  | 2.86021100  |
| H  | 2.31212000  | 5.70020600  | 2.64904800  |
| N  | -1.62863700 | -0.50005700 | 1.98071500  |
| S  | -0.67385200 | -0.89510700 | 3.36295700  |
| O  | -1.60116500 | -1.09846000 | 4.46081400  |
| O  | 0.36003000  | 0.13240300  | 3.40341900  |
| C  | -2.93255900 | -1.15364900 | 1.88866200  |
| H  | -3.65205300 | -0.70861400 | 2.58370900  |
| H  | -2.81536800 | -2.21847700 | 2.10690200  |
| Au | 0.74180800  | 0.04427200  | -0.40877900 |
| P  | 1.26722900  | -1.40715400 | -2.23424800 |
| H  | -3.29132600 | -1.05976700 | 0.86040500  |
| C  | 0.07613200  | -2.44110600 | 2.96454000  |
| C  | -0.63648600 | -3.62378600 | 3.15889900  |
| C  | 1.40014100  | -2.44940700 | 2.52743900  |
| C  | -0.01838700 | -4.83087700 | 2.86188200  |
| H  | -1.64845900 | -3.60601300 | 3.55621600  |
| C  | 2.00588000  | -3.66968100 | 2.26722100  |

|   |             |             |             |
|---|-------------|-------------|-------------|
| H | 1.94837000  | -1.51657700 | 2.41168100  |
| C | 1.30385300  | -4.87206000 | 2.40810400  |
| H | -0.56465600 | -5.76173200 | 3.00135100  |
| H | 3.04539600  | -3.69550900 | 1.94336800  |
| C | 1.95870400  | -6.16799500 | 2.05198100  |
| H | 1.98603400  | -6.29241400 | 0.96053100  |
| H | 1.42039500  | -7.02447300 | 2.46926500  |
| H | 2.99592600  | -6.20119000 | 2.40308600  |
| C | -0.02479700 | -2.80582700 | -2.13980300 |
| C | -0.32102100 | -3.09610400 | -0.66372000 |
| C | 0.37007300  | -4.12597500 | -2.79939100 |
| C | -1.30316000 | -2.25812000 | -2.77700500 |
| H | -0.74826600 | -2.22255200 | -0.15119100 |
| H | 0.56686200  | -3.41906900 | -0.10663900 |
| H | -1.05944300 | -3.90901600 | -0.61285300 |
| H | 0.56880000  | -4.04339300 | -3.87214600 |
| H | -0.46914000 | -4.82640900 | -2.68620900 |
| H | 1.24096200  | -4.58329000 | -2.31494800 |
| H | -2.12212600 | -2.96412800 | -2.58255000 |
| H | -1.21483500 | -2.13676800 | -3.86224200 |
| H | -1.59186500 | -1.28857200 | -2.34379400 |
| C | 3.05887400  | -1.98971800 | -2.10436500 |
| C | 3.54530700  | -2.85921600 | -3.26010000 |
| C | 3.22422500  | -2.73986500 | -0.78642100 |
| C | 3.90267300  | -0.71342500 | -2.06481900 |
| H | 3.53201800  | -2.32189800 | -4.21468400 |
| H | 2.97070300  | -3.78446700 | -3.37091900 |
| H | 4.58834500  | -3.14055400 | -3.05920000 |
| H | 2.88320100  | -2.13801800 | 0.06618700  |
| H | 4.28922200  | -2.96534900 | -0.63506300 |

|   |             |             |             |
|---|-------------|-------------|-------------|
| H | 2.67888800  | -3.69247700 | -0.77740100 |
| H | 4.96061600  | -0.99184000 | -1.96310100 |
| H | 3.63848200  | -0.07023700 | -1.21356700 |
| H | 3.80070900  | -0.12728400 | -2.98750400 |
| C | 1.13791900  | -0.65994900 | -3.91494000 |
| C | 1.02481500  | 0.72591300  | -4.14782800 |
| C | 1.19509800  | -1.51890100 | -5.02536400 |
| C | 0.98316000  | 1.18868600  | -5.47094400 |
| C | 0.94359700  | 1.79473900  | -3.11224600 |
| C | 1.13948300  | -1.04440800 | -6.32775300 |
| H | 1.29129400  | -2.58956200 | -4.87581400 |
| C | 1.03557800  | 0.32299300  | -6.55325200 |
| H | 0.90101900  | 2.26128400  | -5.63890400 |
| C | 2.08047300  | 2.54299500  | -2.79007500 |
| C | -0.29454500 | 2.18207500  | -2.58612700 |
| H | 1.18244700  | -1.74324200 | -7.15947800 |
| H | 0.99503400  | 0.71548000  | -7.56651700 |
| C | 1.98346100  | 3.65044800  | -1.95205700 |
| H | 3.04223500  | 2.26336100  | -3.21916800 |
| C | -0.39239800 | 3.30121100  | -1.76245000 |
| H | -1.18766600 | 1.61193700  | -2.84430200 |
| C | 0.74527400  | 4.03618800  | -1.44325400 |
| H | 2.87547100  | 4.22476800  | -1.70921000 |
| H | -1.36213700 | 3.59941100  | -1.36731500 |
| H | 0.66735300  | 4.91108200  | -0.80073000 |
| C | -3.98645800 | 2.38254800  | 1.50470700  |
| C | -3.42911100 | 2.31094600  | 2.83418800  |
| C | -4.19537300 | 2.90740200  | 3.88379300  |
| C | -5.39433400 | 3.52173600  | 3.62405100  |
| C | -5.92629300 | 3.60110600  | 2.31343200  |



|   |             |            |             |
|---|-------------|------------|-------------|
| C | -5.22361400 | 3.04001600 | 1.27977000  |
| C | -3.33200200 | 1.79282700 | 0.40215400  |
| H | -3.78828600 | 2.85587700 | 4.89134400  |
| H | -5.95195500 | 3.96543300 | 4.44759200  |
| H | -6.87632400 | 4.09845700 | 2.13878400  |
| H | -5.60581700 | 3.07896000 | 0.25942300  |
| H | -3.80466600 | 1.93332600 | -0.57587500 |
| O | -2.29906600 | 1.76823000 | 3.06287800  |
| N | -2.23182900 | 1.08973500 | 0.37044200  |

**SMD-M06/6-31G(d,p)/SDD**

Electronic Energy (0K) = -2875.678589

Electronic Energy (0K) + ZPE = -2874.881896

Enthalpy (298K) = -2874.830322

Free Energy (298K) = -2874.966455

**SMD-M06/6-311+G(d,p)/SDD**

Electronic Energy (0K) = -2876.185787

**C1**

Number of imaginary frequencies: 0

|   |             |            |            |
|---|-------------|------------|------------|
| C | -1.59182700 | 0.95407500 | 1.47391700 |
| C | -0.17501400 | 1.33526500 | 1.05047600 |
| C | 0.40589900  | 2.58847500 | 1.39931300 |
| C | 1.81652500  | 2.68314100 | 1.28228200 |
| C | -0.30837700 | 3.74179900 | 1.81702300 |
| C | 2.48877400  | 3.83585200 | 1.64493400 |
| H | 2.36425900  | 1.80884800 | 0.93117000 |
| C | 0.36671600  | 4.91118200 | 2.11303800 |
| H | -1.39232700 | 3.73380000 | 1.85265700 |
| C | 1.76175100  | 4.95319400 | 2.05413900 |
| H | 3.57286000  | 3.87794700 | 1.58626900 |

|    |             |             |             |
|----|-------------|-------------|-------------|
| H  | -0.19116400 | 5.79793500  | 2.40161500  |
| H  | 2.28379900  | 5.87117800  | 2.31434500  |
| N  | -1.64681300 | -0.48412900 | 1.78424700  |
| S  | -0.79577000 | -0.85387900 | 3.20562300  |
| O  | -1.72001400 | -0.91717800 | 4.33371900  |
| O  | 0.32427600  | 0.09112400  | 3.22178700  |
| C  | -2.93159800 | -1.17601900 | 1.66012200  |
| H  | -3.67163600 | -0.85649200 | 2.40513500  |
| H  | -2.76408600 | -2.25312700 | 1.76416200  |
| Au | 0.58718500  | 0.13994900  | -0.47352000 |
| P  | 1.16384900  | -1.37210500 | -2.24695500 |
| H  | -3.31878800 | -1.01045200 | 0.65154700  |
| C  | -0.15065200 | -2.47730600 | 2.93120100  |
| C  | -0.93395400 | -3.59515100 | 3.20958800  |
| C  | 1.16895500  | -2.60500100 | 2.50113400  |
| C  | -0.39267700 | -4.85921600 | 3.00977700  |
| H  | -1.94497200 | -3.48136200 | 3.59351500  |
| C  | 1.69764400  | -3.87586300 | 2.33296700  |
| H  | 1.77140100  | -1.71766600 | 2.31703400  |
| C  | 0.92421300  | -5.01864900 | 2.56914300  |
| H  | -0.99686700 | -5.74039900 | 3.21723800  |
| H  | 2.73236300  | -3.98948500 | 2.01115400  |
| C  | 1.50982300  | -6.37709600 | 2.34790000  |
| H  | 1.73524500  | -6.53349200 | 1.28503700  |
| H  | 0.82744900  | -7.17005700 | 2.66861100  |
| H  | 2.45431100  | -6.49364400 | 2.89234700  |
| C  | -0.14939700 | -2.75144800 | -2.17575100 |
| C  | -0.47507900 | -3.03332400 | -0.70440300 |
| C  | 0.22571800  | -4.08038400 | -2.82852200 |
| C  | -1.40439300 | -2.17505300 | -2.83414300 |

|   |             |             |             |
|---|-------------|-------------|-------------|
| H | -0.85205900 | -2.14076300 | -0.18810000 |
| H | 0.38765800  | -3.41110400 | -0.14281000 |
| H | -1.25919800 | -3.80336000 | -0.66482900 |
| H | 0.42109300  | -4.00734000 | -3.90239700 |
| H | -0.62216700 | -4.76928600 | -2.70845700 |
| H | 1.09172000  | -4.54673400 | -2.34418500 |
| H | -2.23593200 | -2.87681700 | -2.68110000 |
| H | -1.28429000 | -2.02721200 | -3.91339900 |
| H | -1.69472200 | -1.21442800 | -2.38299800 |
| C | 2.93864700  | -1.98144900 | -2.01083600 |
| C | 3.48797200  | -2.85375200 | -3.13600400 |
| C | 3.01668600  | -2.74119100 | -0.68997900 |
| C | 3.79340900  | -0.71548800 | -1.91404400 |
| H | 3.55239400  | -2.31226600 | -4.08610700 |
| H | 2.90464600  | -3.76729900 | -3.29270200 |
| H | 4.50864400  | -3.15764400 | -2.86458000 |
| H | 2.60461600  | -2.15431400 | 0.14136100  |
| H | 4.07122400  | -2.95222900 | -0.46271800 |
| H | 2.48921700  | -3.70247400 | -0.73262700 |
| H | 4.84219800  | -1.00570200 | -1.76179000 |
| H | 3.49099200  | -0.07871000 | -1.07096600 |
| H | 3.74458700  | -0.11817600 | -2.83411600 |
| C | 1.14245900  | -0.68401900 | -3.95915500 |
| C | 1.08743400  | 0.69617900  | -4.24307200 |
| C | 1.25390100  | -1.57855400 | -5.03685900 |
| C | 1.16620200  | 1.11759200  | -5.57854100 |
| C | 0.94248200  | 1.80012200  | -3.25310800 |
| C | 1.31090000  | -1.14509400 | -6.35363400 |
| H | 1.31220100  | -2.64554100 | -4.84838000 |
| C | 1.27312100  | 0.21689900  | -6.62746300 |

|   |             |             |             |
|---|-------------|-------------|-------------|
| H | 1.13084200  | 2.18630500  | -5.78363600 |
| C | 2.04621900  | 2.59633100  | -2.93140000 |
| C | -0.32099300 | 2.16892800  | -2.77714400 |
| H | 1.39339200  | -1.87167400 | -7.15824100 |
| H | 1.32526500  | 0.57777700  | -7.65190800 |
| C | 1.89207500  | 3.73403500  | -2.14380600 |
| H | 3.02780400  | 2.32959600  | -3.32204200 |
| C | -0.47631800 | 3.31804500  | -2.00548400 |
| H | -1.18822800 | 1.56133400  | -3.03632200 |
| C | 0.62846200  | 4.10247100  | -1.68797300 |
| H | 2.75910100  | 4.34523800  | -1.90073500 |
| H | -1.46620000 | 3.59967100  | -1.65004300 |
| H | 0.50511100  | 5.00193500  | -1.08784900 |
| C | -4.10239500 | 2.14653300  | 1.65840500  |
| C | -3.29036700 | 2.02488800  | 2.79159000  |
| C | -3.77490400 | 2.32126600  | 4.05880900  |
| C | -5.09462200 | 2.74199000  | 4.17742700  |
| C | -5.92317000 | 2.87259100  | 3.05717700  |
| C | -5.42624000 | 2.57764400  | 1.79826900  |
| C | -3.49735300 | 1.78933000  | 0.40162200  |
| H | -3.12101300 | 2.21557200  | 4.92057600  |
| H | -5.48843400 | 2.97206300  | 5.16465100  |
| H | -6.95084700 | 3.20363500  | 3.17758100  |
| H | -6.04910400 | 2.66722600  | 0.90982400  |
| H | -4.05254400 | 1.99269100  | -0.51934500 |
| O | -1.98726100 | 1.68502400  | 2.64475300  |
| N | -2.34974800 | 1.21710100  | 0.27766400  |

**SMD-M06/6-31G(d,p)/SDD**

Electronic Energy (0K) = -2875.705421

Electronic Energy (0K) + ZPE = -2874.906525

Enthalpy (298K) = -2874.855020

Free Energy (298K) = -2874.992442

**SMD-M06/6-311+G(d,p)/SDD**

Electronic Energy (0K) = -2876.208294

**TS<sub>D1</sub>**

Number of imaginary frequencies: 1

|    |             |             |             |
|----|-------------|-------------|-------------|
| C  | -1.88882500 | 1.07400200  | 1.17190300  |
| C  | -0.46801000 | 1.05776200  | 0.74825700  |
| C  | 0.57276900  | 1.86258200  | 1.37206500  |
| C  | 1.90291700  | 1.39638000  | 1.29710300  |
| C  | 0.35025200  | 3.14149100  | 1.92053200  |
| C  | 2.95727100  | 2.14537100  | 1.79362800  |
| H  | 2.08984400  | 0.42035000  | 0.84857000  |
| C  | 1.41499400  | 3.91058200  | 2.36927900  |
| H  | -0.65494800 | 3.54217900  | 1.97398800  |
| C  | 2.71410600  | 3.41150400  | 2.32504700  |
| H  | 3.97087900  | 1.75527800  | 1.74685900  |
| H  | 1.22701400  | 4.90373300  | 2.76954700  |
| H  | 3.54076400  | 4.01345700  | 2.69537200  |
| N  | -1.45862100 | -0.18587600 | 1.92877300  |
| S  | -1.23529400 | -0.19987900 | 3.65863100  |
| O  | -2.50243900 | -0.62199400 | 4.24088000  |
| O  | -0.62861700 | 1.06091200  | 4.04497400  |
| C  | -1.86096900 | -1.49574900 | 1.39406600  |
| H  | -2.78535400 | -1.83840200 | 1.87606000  |
| H  | -1.05885300 | -2.22538600 | 1.54453000  |
| Au | 0.04295400  | -0.03867300 | -0.97381400 |
| P  | 0.71579400  | -1.40412500 | -2.80747800 |
| H  | -2.03884900 | -1.39489800 | 0.32280000  |

|   |             |             |             |
|---|-------------|-------------|-------------|
| C | -0.05280700 | -1.50032600 | 3.82994300  |
| C | -0.47581700 | -2.77553900 | 4.19155600  |
| C | 1.28917800  | -1.21651000 | 3.57833100  |
| C | 0.47052500  | -3.78790100 | 4.28965000  |
| H | -1.52774700 | -2.97095600 | 4.38575400  |
| C | 2.21526300  | -2.24286400 | 3.67499900  |
| H | 1.60104000  | -0.20598200 | 3.32222600  |
| C | 1.82111100  | -3.54064100 | 4.02737100  |
| H | 0.15636900  | -4.79093800 | 4.57203000  |
| H | 3.26780700  | -2.03914900 | 3.48371400  |
| C | 2.84224500  | -4.62740500 | 4.13852700  |
| H | 3.49904400  | -4.64366200 | 3.26096800  |
| H | 2.37705300  | -5.61229100 | 4.24219400  |
| H | 3.48496400  | -4.46606500 | 5.01322700  |
| C | -0.77379100 | -2.41799400 | -3.38406500 |
| C | -1.17848600 | -3.37328800 | -2.26204100 |
| C | -0.57985900 | -3.21311100 | -4.67313600 |
| C | -1.89827100 | -1.40386300 | -3.61016800 |
| H | -1.29144800 | -2.86043200 | -1.29746300 |
| H | -0.46246700 | -4.19472900 | -2.14000300 |
| H | -2.14943900 | -3.82057700 | -2.51630600 |
| H | -0.43030400 | -2.56118900 | -5.54049200 |
| H | -1.49589700 | -3.79161600 | -4.85712500 |
| H | 0.25154100  | -3.92492700 | -4.62048500 |
| H | -2.79699400 | -1.94030000 | -3.94481800 |
| H | -1.63841300 | -0.67582900 | -4.39029800 |
| H | -2.15112700 | -0.85476100 | -2.69231700 |
| C | 2.17445200  | -2.45961700 | -2.19160900 |
| C | 2.48344400  | -3.70921900 | -3.01169200 |
| C | 1.88980400  | -2.89182200 | -0.74855900 |

|   |             |             |             |
|---|-------------|-------------|-------------|
| C | 3.39246500  | -1.53299600 | -2.18094400 |
| H | 2.75967000  | -3.48619700 | -4.04716000 |
| H | 1.64895400  | -4.42033800 | -3.01256300 |
| H | 3.34415100  | -4.21727000 | -2.55446700 |
| H | 1.73977900  | -2.03046800 | -0.08362700 |
| H | 2.75716200  | -3.45633700 | -0.37807100 |
| H | 1.01318900  | -3.54377700 | -0.66569900 |
| H | 4.22166200  | -2.04656100 | -1.67519500 |
| H | 3.19551600  | -0.60009800 | -1.63230200 |
| H | 3.72692300  | -1.27175400 | -3.19155100 |
| C | 1.34464700  | -0.49476100 | -4.28403100 |
| C | 1.45157700  | 0.91269300  | -4.34333800 |
| C | 1.84818800  | -1.24591000 | -5.35928300 |
| C | 2.08067100  | 1.49504000  | -5.45340700 |
| C | 0.94766900  | 1.87728000  | -3.32789900 |
| C | 2.45197100  | -0.64966700 | -6.45740600 |
| H | 1.77812500  | -2.32869400 | -5.33978000 |
| C | 2.57719300  | 0.73360900  | -6.50074900 |
| H | 2.16254200  | 2.58010200  | -5.48783300 |
| C | 1.85789700  | 2.67892800  | -2.62925400 |
| C | -0.42258800 | 2.10229800  | -3.15002300 |
| H | 2.82822800  | -1.26750600 | -7.26904000 |
| H | 3.05486000  | 1.22020700  | -7.34783400 |
| C | 1.41081200  | 3.67539600  | -1.76611400 |
| H | 2.92588800  | 2.51984900  | -2.77687700 |
| C | -0.86959700 | 3.10726600  | -2.29369000 |
| H | -1.14148800 | 1.50082800  | -3.70514400 |
| C | 0.04554100  | 3.89603000  | -1.60057200 |
| H | 2.13244500  | 4.29073800  | -1.23249500 |
| H | -1.93810500 | 3.27837500  | -2.17819500 |

|   |             |            |             |
|---|-------------|------------|-------------|
| H | -0.30387500 | 4.68551800 | -0.93832800 |
| C | -4.52879600 | 1.35615000 | 1.75825800  |
| C | -3.56089400 | 2.01345000 | 2.52083100  |
| C | -3.87806000 | 2.65525800 | 3.70803600  |
| C | -5.19550200 | 2.59821400 | 4.14675200  |
| C | -6.18203900 | 1.93424300 | 3.40847600  |
| C | -5.85438400 | 1.32763300 | 2.20780200  |
| C | -4.07900600 | 0.87344500 | 0.47786200  |
| H | -3.10126300 | 3.16396200 | 4.27235500  |
| H | -5.46057900 | 3.07848100 | 5.08553300  |
| H | -7.20450500 | 1.90610200 | 3.77450000  |
| H | -6.60891300 | 0.82759800 | 1.60343400  |
| H | -4.82862200 | 0.61322100 | -0.27458400 |
| O | -2.27884600 | 2.07834200 | 2.05032100  |
| N | -2.83824000 | 0.77816000 | 0.14150700  |

**SMD-M06/6-31G(d,p)/SDD**

Electronic Energy (0K) = -2875.695231

Electronic Energy (0K) + ZPE = -2874.896439

Enthalpy (298K) = -2874.845786

Free Energy (298K) = -2874.980244

**SMD-M06/6-311+G(d,p)/SDD**

Electronic Energy (0K) = -2876.198860

**D1**

Number of imaginary frequencies: 0

|   |             |            |            |
|---|-------------|------------|------------|
| C | -1.84801400 | 1.00163800 | 1.25258300 |
| C | -0.43593900 | 0.73351700 | 0.97046500 |
| C | 0.68198500  | 1.57544700 | 1.48408900 |
| C | 1.94764800  | 0.99030300 | 1.63227600 |
| C | 0.55583000  | 2.95100500 | 1.69545600 |



|    |             |             |             |
|----|-------------|-------------|-------------|
| C  | 3.04563600  | 1.74808000  | 2.01894400  |
| H  | 2.06398500  | -0.07556600 | 1.43009100  |
| C  | 1.66159500  | 3.71409400  | 2.06230000  |
| H  | -0.40973200 | 3.43317700  | 1.57458100  |
| C  | 2.90687900  | 3.11899700  | 2.23239400  |
| H  | 4.01569300  | 1.26998000  | 2.13870300  |
| H  | 1.54280400  | 4.78437400  | 2.21879800  |
| H  | 3.76693000  | 3.71779700  | 2.52315600  |
| N  | -1.12832800 | -0.26463700 | 1.94199500  |
| S  | -0.97397800 | -0.24438600 | 3.76153900  |
| O  | -2.31131700 | -0.59962500 | 4.20780700  |
| O  | -0.35620600 | 1.01098100  | 4.13348300  |
| C  | -1.46508900 | -1.62223700 | 1.46442100  |
| H  | -2.23477900 | -2.05550800 | 2.11015300  |
| H  | -0.56091000 | -2.24045900 | 1.45699900  |
| Au | 0.13401600  | -0.13758300 | -0.90941400 |
| P  | 0.87750400  | -1.37656900 | -2.80289800 |
| H  | -1.86305300 | -1.54347800 | 0.45231600  |
| C  | 0.13656900  | -1.57668700 | 4.06526100  |
| C  | -0.37321200 | -2.84554700 | 4.33816000  |
| C  | 1.50801300  | -1.31942100 | 4.06138700  |
| C  | 0.51860700  | -3.87726600 | 4.59075600  |
| H  | -1.44600700 | -3.01914500 | 4.35779300  |
| C  | 2.37853300  | -2.36829700 | 4.31197100  |
| H  | 1.88356200  | -0.31603500 | 3.87520300  |
| C  | 1.90049400  | -3.65783700 | 4.57688500  |
| H  | 0.13842600  | -4.87372900 | 4.80670500  |
| H  | 3.45162600  | -2.18597200 | 4.31487700  |
| C  | 2.85562500  | -4.76823500 | 4.87365300  |
| H  | 3.74463500  | -4.71025900 | 4.23639800  |

|   |             |             |             |
|---|-------------|-------------|-------------|
| H | 2.38967700  | -5.74922800 | 4.73905400  |
| H | 3.20255900  | -4.70665000 | 5.91324400  |
| C | -0.57442800 | -2.45849900 | -3.36290900 |
| C | -0.91466000 | -3.43946100 | -2.24174200 |
| C | -0.37774000 | -3.23862200 | -4.66054900 |
| C | -1.74767300 | -1.49383100 | -3.55866300 |
| H | -1.01702500 | -2.94113200 | -1.26840500 |
| H | -0.16710400 | -4.23667200 | -2.15154800 |
| H | -1.87612800 | -3.91817900 | -2.47420100 |
| H | -0.28062600 | -2.57830200 | -5.52882400 |
| H | -1.27137200 | -3.85713100 | -4.82367700 |
| H | 0.48488100  | -3.91378700 | -4.63214500 |
| H | -2.62607900 | -2.06591700 | -3.88842900 |
| H | -1.53353500 | -0.74253000 | -4.33071000 |
| H | -2.01123400 | -0.97011700 | -2.62884800 |
| C | 2.40267100  | -2.35835500 | -2.22599600 |
| C | 2.79495900  | -3.54729800 | -3.09836200 |
| C | 2.15753500  | -2.86986000 | -0.80240700 |
| C | 3.55358000  | -1.35032400 | -2.17452200 |
| H | 3.05296000  | -3.26186300 | -4.12279300 |
| H | 2.01152300  | -4.31370600 | -3.12977900 |
| H | 3.68947900  | -4.01470800 | -2.66309200 |
| H | 1.94792800  | -2.04970500 | -0.10256000 |
| H | 3.06722200  | -3.38168300 | -0.45823400 |
| H | 1.33419300  | -3.59001700 | -0.74596800 |
| H | 4.42523700  | -1.83525500 | -1.71371600 |
| H | 3.30118600  | -0.47135600 | -1.56294300 |
| H | 3.85184800  | -1.00343300 | -3.17090400 |
| C | 1.44198500  | -0.43852600 | -4.28778700 |
| C | 1.51343000  | 0.97085500  | -4.33011000 |

|   |             |             |             |
|---|-------------|-------------|-------------|
| C | 1.93920300  | -1.16193200 | -5.38499800 |
| C | 2.10216200  | 1.58531400  | -5.44483700 |
| C | 1.01196700  | 1.90139400  | -3.28475700 |
| C | 2.50245000  | -0.53514000 | -6.48776900 |
| H | 1.89764800  | -2.24603000 | -5.38079900 |
| C | 2.59294600  | 0.85127800  | -6.51417900 |
| H | 2.15658100  | 2.67248700  | -5.46452100 |
| C | 1.92028300  | 2.71810000  | -2.60170200 |
| C | -0.35722600 | 2.07594900  | -3.05733500 |
| H | 2.87476700  | -1.13216000 | -7.31666000 |
| H | 3.03906900  | 1.36095700  | -7.36490300 |
| C | 1.47161500  | 3.68515500  | -1.70802200 |
| H | 2.98699600  | 2.59468500  | -2.78711800 |
| C | -0.80706600 | 3.05269100  | -2.17063700 |
| H | -1.07392600 | 1.45981300  | -3.59932500 |
| C | 0.10589200  | 3.85949400  | -1.49614200 |
| H | 2.19045200  | 4.31190700  | -1.18402700 |
| H | -1.87599100 | 3.18648300  | -2.01495500 |
| H | -0.24565500 | 4.62893900  | -0.81203300 |
| C | -4.45268100 | 1.38684100  | 1.95143700  |
| C | -3.42917800 | 2.00754500  | 2.66972100  |
| C | -3.67153300 | 2.70918300  | 3.83910600  |
| C | -4.98068800 | 2.76175100  | 4.30233200  |
| C | -6.02658600 | 2.14248700  | 3.60716200  |
| C | -5.76755000 | 1.46585600  | 2.42806800  |
| C | -4.06671000 | 0.78643200  | 0.70462200  |
| H | -2.84796200 | 3.18189200  | 4.36727200  |
| H | -5.19293500 | 3.29430500  | 5.22614100  |
| H | -7.04062200 | 2.20173900  | 3.99222700  |
| H | -6.56591200 | 0.99051800  | 1.86164500  |

|   |             |            |            |
|---|-------------|------------|------------|
| H | -4.85082500 | 0.47127900 | 0.01142100 |
| O | -2.15222500 | 1.96615200 | 2.17839100 |
| N | -2.83977400 | 0.62502100 | 0.32903700 |

**SMD-M06/6-31G(d,p)/SDD**

Electronic Energy (0K) = -2875.704025

Electronic Energy (0K) + ZPE = -2874.904587

Enthalpy (298K) = -2874.853378

Free Energy (298K) = -2874.989725

**SMD-M06/6-311+G(d,p)/SDD**

Electronic Energy (0K) = -2876.207795

**E1**

Number of imaginary frequencies: 0

|   |             |             |            |
|---|-------------|-------------|------------|
| C | -2.17292400 | 0.28568400  | 2.36924200 |
| C | -0.79609300 | 0.03456400  | 2.16399700 |
| C | 0.30374500  | 0.90159600  | 2.69817100 |
| C | 1.58377700  | 0.72747000  | 2.14854000 |
| C | 0.15240900  | 1.80197100  | 3.75830400 |
| C | 2.66872500  | 1.45597900  | 2.61413900 |
| H | 1.72341800  | -0.01110100 | 1.35850900 |
| C | 1.24475500  | 2.52454100  | 4.22941100 |
| H | -0.81048600 | 1.91708600  | 4.24468600 |
| C | 2.50165700  | 2.36497800  | 3.65623500 |
| H | 3.64982200  | 1.30452200  | 2.16993300 |
| H | 1.11057100  | 3.20827300  | 5.06410400 |
| H | 3.34968700  | 2.93397100  | 4.02866700 |
| N | -0.42751900 | -1.34477600 | 2.04624300 |
| S | -0.53875600 | -2.24369800 | 3.49320800 |
| O | -1.21468900 | -3.49405000 | 3.18455100 |
| O | -1.04474600 | -1.31312600 | 4.49435100 |

|   |             |             |             |
|---|-------------|-------------|-------------|
| C | -0.55264700 | -2.10888300 | 0.81552700  |
| H | -1.59316000 | -2.37421800 | 0.58573900  |
| H | 0.03721600  | -3.02818300 | 0.89506400  |
| H | -0.13327100 | -1.51791900 | -0.01012700 |
| C | 1.15273000  | -2.61393800 | 3.87454000  |
| C | 1.68308100  | -3.84549900 | 3.50134000  |
| C | 1.92935100  | -1.65749300 | 4.52219700  |
| C | 3.01788800  | -4.11035900 | 3.77303700  |
| H | 1.04494900  | -4.58831800 | 3.02885100  |
| C | 3.26271200  | -1.94063800 | 4.78092500  |
| H | 1.48855600  | -0.71156500 | 4.83019200  |
| C | 3.82721200  | -3.16371800 | 4.40807800  |
| H | 3.44292500  | -5.07355000 | 3.49511700  |
| H | 3.87822700  | -1.20020400 | 5.28944100  |
| C | 5.27108000  | -3.45884900 | 4.67140400  |
| H | 5.86559800  | -3.36742700 | 3.75350300  |
| H | 5.41119800  | -4.48078600 | 5.04084700  |
| H | 5.69915700  | -2.77172500 | 5.40801800  |
| C | -4.81853600 | 0.95971600  | 2.38667300  |
| C | -3.83947500 | 1.91039400  | 2.68976200  |
| C | -4.14916600 | 3.24341700  | 2.90748000  |
| C | -5.47992900 | 3.62552700  | 2.79800700  |
| C | -6.48124600 | 2.69666500  | 2.49090800  |
| C | -6.15535800 | 1.36757500  | 2.29158500  |
| C | -4.34699000 | -0.38215400 | 2.20389500  |
| H | -3.35997500 | 3.94953500  | 3.15213700  |
| H | -5.74687300 | 4.66663100  | 2.95844800  |
| H | -7.51435400 | 3.02239600  | 2.41688300  |
| H | -6.92224900 | 0.62950800  | 2.06374100  |
| H | -5.07005200 | -1.19284100 | 2.07997700  |

|    |             |             |             |
|----|-------------|-------------|-------------|
| O  | -2.53797900 | 1.51409200  | 2.80784500  |
| N  | -3.09159900 | -0.69746700 | 2.16673200  |
| Au | -1.07954200 | 1.09812800  | 0.12324100  |
| P  | -0.76832900 | 2.79778400  | -1.51010900 |
| C  | 0.99861600  | 2.61411700  | -2.17009300 |
| C  | 1.98453300  | 2.84455800  | -1.02603700 |
| C  | 1.36054900  | 3.53289800  | -3.33610600 |
| C  | 1.11441800  | 1.16585100  | -2.65206900 |
| H  | 1.75658600  | 2.24079100  | -0.13809500 |
| H  | 2.03642300  | 3.89750900  | -0.72473800 |
| H  | 2.98950100  | 2.56015600  | -1.36558300 |
| H  | 0.77799400  | 3.31405400  | -4.23682200 |
| H  | 2.41545800  | 3.36331600  | -3.58961700 |
| H  | 1.25989500  | 4.59740600  | -3.09732800 |
| H  | 2.12046800  | 1.00388600  | -3.06125100 |
| H  | 0.39946900  | 0.94104800  | -3.45435100 |
| H  | 0.96869800  | 0.44176200  | -1.83797900 |
| C  | -1.08014800 | 4.41888500  | -0.55723500 |
| C  | -0.48133700 | 5.66819200  | -1.19979400 |
| C  | -0.51910600 | 4.28876400  | 0.86281900  |
| C  | -2.60109400 | 4.56648900  | -0.46179600 |
| H  | -0.87554600 | 5.87088000  | -2.20007300 |
| H  | 0.61314600  | 5.63281400  | -1.24902300 |
| H  | -0.74233300 | 6.53725100  | -0.58116900 |
| H  | -1.00233700 | 3.48298800  | 1.43027600  |
| H  | -0.70900600 | 5.22875300  | 1.39902400  |
| H  | 0.56193300  | 4.11382400  | 0.89086600  |
| H  | -2.83399200 | 5.39967400  | 0.21545900  |
| H  | -3.08065800 | 3.66624900  | -0.04907500 |
| H  | -3.06588900 | 4.78600200  | -1.42956400 |

|   |             |             |             |
|---|-------------|-------------|-------------|
| C | -1.90919300 | 2.85089300  | -2.94946700 |
| C | -3.00254500 | 1.97297500  | -3.10727200 |
| C | -1.77667100 | 3.92105700  | -3.85069800 |
| C | -3.92707100 | 2.22717600  | -4.12940700 |
| C | -3.26896800 | 0.75186500  | -2.30502800 |
| C | -2.69244900 | 4.14325900  | -4.86775300 |
| H | -0.94331000 | 4.60878900  | -3.75609400 |
| C | -3.78441200 | 3.29548300  | -5.00023500 |
| H | -4.76545400 | 1.54323700  | -4.24470500 |
| C | -4.45998500 | 0.64453000  | -1.58013700 |
| C | -2.43479400 | -0.36789700 | -2.39957000 |
| H | -2.55381500 | 4.98049400  | -5.54630900 |
| H | -4.51839300 | 3.45865000  | -5.78493600 |
| C | -4.81056800 | -0.55572100 | -0.97038800 |
| H | -5.12454300 | 1.50608700  | -1.51766400 |
| C | -2.78828500 | -1.56720100 | -1.78959200 |
| H | -1.52532500 | -0.30968200 | -2.99598500 |
| C | -3.97753000 | -1.66525800 | -1.07335900 |
| H | -5.75808700 | -0.63102900 | -0.43958500 |
| H | -2.14223600 | -2.43592900 | -1.89588700 |
| H | -4.25633800 | -2.60713000 | -0.60569600 |

**SMD-M06/6-31G(d,p)/SDD**

Electronic Energy (0K) = -2875.702729

Electronic Energy (0K) + ZPE = -2874.900646

Enthalpy (298K) = -2874.849097

Free Energy (298K) = -2874.986951

**SMD-M06/6-311+G(d,p)/SDD**

Electronic Energy (0K) = -2876.257499

**3a-E**

Number of imaginary frequencies: 0

|   |             |             |            |
|---|-------------|-------------|------------|
| C | -2.04051400 | 0.72741800  | 2.42672500 |
| C | -0.74071200 | 0.30622700  | 2.38618400 |
| C | 0.46836300  | 1.14143200  | 2.36459000 |
| C | 1.67298700  | 0.56964900  | 1.91462200 |
| C | 0.50752700  | 2.48031800  | 2.79409700 |
| C | 2.85335100  | 1.30029100  | 1.88147600 |
| H | 1.67606200  | -0.47007700 | 1.59372800 |
| C | 1.69263300  | 3.20555000  | 2.76455300 |
| H | -0.38992700 | 2.95609800  | 3.17384000 |
| C | 2.87203800  | 2.62659400  | 2.30447000 |
| H | 3.76525100  | 0.82641500  | 1.52339200 |
| H | 1.69244200  | 4.23630100  | 3.11348000 |
| H | 3.79590100  | 3.20018900  | 2.28263800 |
| N | -0.53460200 | -1.10060000 | 2.28668700 |
| S | -0.58469800 | -2.04651900 | 3.66452400 |
| O | -1.58200600 | -3.10251800 | 3.50462400 |
| O | -0.65455300 | -1.13448500 | 4.80087600 |
| C | -0.79179000 | -1.77868900 | 1.02244700 |
| H | -1.86090800 | -1.97201100 | 0.86504600 |
| H | -0.24367000 | -2.72807600 | 0.98367600 |
| H | -0.41456500 | -1.14363300 | 0.21440300 |
| C | 1.00761000  | -2.83583100 | 3.67490500 |
| C | 1.13061000  | -4.15822500 | 3.26513800 |
| C | 2.12137200  | -2.10272700 | 4.08702800 |
| C | 2.38948900  | -4.75200600 | 3.26446700 |
| H | 0.24862800  | -4.71684600 | 2.96141200 |
| C | 3.36669200  | -2.71016400 | 4.08043200 |
| H | 2.00831700  | -1.07076400 | 4.41317800 |
| C | 3.52020100  | -4.04132400 | 3.66890600 |



|   |             |             |            |
|---|-------------|-------------|------------|
| H | 2.49482000  | -5.78835100 | 2.94765400 |
| H | 4.24259100  | -2.14905100 | 4.40380700 |
| C | 4.87528500  | -4.67713300 | 3.67731100 |
| H | 5.58516100  | -4.10260800 | 3.06982800 |
| H | 4.84424400  | -5.70007700 | 3.28925300 |
| H | 5.28603200  | -4.71320800 | 4.69404800 |
| C | -4.63474100 | 1.65137200  | 2.53216700 |
| C | -3.56503000 | 2.54769200  | 2.45839600 |
| C | -3.76920100 | 3.91972800  | 2.44814700 |
| C | -5.07619400 | 4.39135200  | 2.51416200 |
| C | -6.16178300 | 3.51411600  | 2.58954700 |
| C | -5.94028100 | 2.14528900  | 2.59767500 |
| C | -4.28736400 | 0.25376600  | 2.52860800 |
| H | -2.91729000 | 4.59207500  | 2.38804100 |
| H | -5.25128400 | 5.46450000  | 2.50693200 |
| H | -7.17394300 | 3.90575100  | 2.64068100 |
| H | -6.76763400 | 1.44000500  | 2.65457700 |
| H | -5.09031400 | -0.48666100 | 2.57240200 |
| O | -2.28924300 | 2.08013700  | 2.39296500 |
| N | -3.07158100 | -0.17692700 | 2.47767600 |

**SMD-M06/6-31G(d,p)/SDD**

Electronic Energy (0K) = -1620.928189

Electronic Energy (0K) + ZPE = -1620.546019

Enthalpy (298K) = -1620.519940

Free Energy (298K) = -1620.603145

**SMD-M06/6-311+G(d,p)/SDD**

Electronic Energy (0K) = -1621.244294

**Pre'**

Number of imaginary frequencies: 0

|    |             |             |             |
|----|-------------|-------------|-------------|
| C  | -3.76044900 | 2.69223500  | 2.68129800  |
| C  | -2.97898700 | 3.66198200  | 2.90999400  |
| C  | -1.59463500 | 3.94415000  | 3.23796900  |
| C  | -1.15018100 | 5.26611700  | 3.38108500  |
| C  | -0.68348600 | 2.88944200  | 3.40205300  |
| C  | 0.17971600  | 5.52676400  | 3.68706100  |
| H  | -1.86058700 | 6.08316600  | 3.24681400  |
| C  | 0.64254100  | 3.15615800  | 3.70865100  |
| H  | -1.03035500 | 1.86387300  | 3.28476900  |
| C  | 1.07594100  | 4.47412800  | 3.85222800  |
| H  | 0.51568400  | 6.55556100  | 3.79573300  |
| H  | 1.34442300  | 2.33555500  | 3.83570600  |
| H  | 2.11668900  | 4.67950100  | 4.09177600  |
| N  | -4.62643400 | 1.79312700  | 2.34208300  |
| S  | -4.89099500 | 1.49717800  | 0.61133000  |
| O  | -6.33332700 | 1.49483500  | 0.44432700  |
| O  | -4.03876800 | 2.46124200  | -0.05994700 |
| C  | -5.63308800 | 1.24631400  | 3.26763400  |
| H  | -5.20363300 | 1.24024900  | 4.27099700  |
| H  | -6.53680500 | 1.86761400  | 3.24600400  |
| Au | -4.49079600 | 5.17346700  | 2.70343600  |
| H  | -5.87586300 | 0.22036900  | 2.97651400  |
| C  | -4.25322400 | -0.13066600 | 0.43277900  |
| C  | -5.13679000 | -1.19962300 | 0.31837300  |
| C  | -2.86860900 | -0.30975400 | 0.43679300  |
| C  | -4.61207700 | -2.47943200 | 0.19077700  |
| H  | -6.21056000 | -1.03037500 | 0.32094200  |
| C  | -2.37106100 | -1.59522000 | 0.31111300  |
| H  | -2.19842700 | 0.54281100  | 0.53163000  |
| C  | -3.23185600 | -2.69537100 | 0.18321500  |

|   |             |             |             |
|---|-------------|-------------|-------------|
| H | -5.28601600 | -3.32833600 | 0.09524600  |
| H | -1.29490000 | -1.75862200 | 0.30925000  |
| C | -2.66801600 | -4.07085600 | 0.02836900  |
| H | -3.43987200 | -4.83864900 | 0.13747900  |
| H | -2.21096700 | -4.19193900 | -0.96199000 |
| H | -1.88042900 | -4.26044900 | 0.76661000  |
| C | -5.80298600 | 6.73716600  | 2.56027500  |
| C | -6.60910500 | 8.83643200  | 2.47413900  |
| C | -7.66337100 | 7.98873200  | 2.37619300  |
| H | -6.55206100 | 9.91595100  | 2.47571100  |
| H | -8.72389200 | 8.16868200  | 2.26525300  |
| N | -7.14573700 | 6.70356500  | 2.43022500  |
| N | -5.47629600 | 8.04629400  | 2.59009500  |
| C | -4.12294500 | 8.50843000  | 2.74368300  |
| C | -3.64996500 | 8.75347200  | 4.04168400  |
| C | -3.32189900 | 8.62577500  | 1.59808500  |
| C | -2.31533400 | 9.14193400  | 4.17248500  |
| C | -1.99476900 | 9.01975800  | 1.78516300  |
| C | -1.49758900 | 9.27700500  | 3.05658000  |
| H | -1.90785200 | 9.33158900  | 5.16387200  |
| H | -1.33960200 | 9.11932800  | 0.92136700  |
| H | -0.46072700 | 9.58276800  | 3.17990700  |
| C | -7.89457700 | 5.48035400  | 2.32979500  |
| C | -8.26386300 | 4.81932600  | 3.50979100  |
| C | -8.16084700 | 4.97275500  | 1.04910100  |
| C | -8.93052500 | 3.59883100  | 3.37567900  |
| C | -8.82773000 | 3.74939400  | 0.97140200  |
| C | -9.20742000 | 3.06849300  | 2.12143100  |
| H | -9.22993600 | 3.05219900  | 4.26869400  |
| H | -9.03719700 | 3.31626800  | -0.00493000 |

|   |             |             |             |
|---|-------------|-------------|-------------|
| H | -9.72024400 | 2.11256400  | 2.03867300  |
| C | -7.93597400 | 5.35699600  | 4.88729100  |
| C | -9.18443700 | 5.49495200  | 5.75404700  |
| C | -6.89394700 | 4.47421900  | 5.57410500  |
| H | -7.50275600 | 6.36142000  | 4.77214900  |
| H | -9.94447100 | 6.11987700  | 5.27026200  |
| H | -8.92917900 | 5.95451400  | 6.71651800  |
| H | -9.63699300 | 4.51820900  | 5.96659300  |
| H | -5.97077600 | 4.40676500  | 4.97771700  |
| H | -7.27924900 | 3.45660800  | 5.72586600  |
| H | -6.63362200 | 4.88037000  | 6.55981200  |
| C | -7.70158600 | 5.67673100  | -0.21030300 |
| C | -6.54817700 | 4.91239000  | -0.85934400 |
| C | -8.84442900 | 5.88361900  | -1.20002800 |
| H | -7.32772200 | 6.67193000  | 0.06676500  |
| H | -5.73015500 | 4.72477500  | -0.14859700 |
| H | -6.14313800 | 5.47607100  | -1.70968000 |
| H | -6.88737900 | 3.93698000  | -1.23237100 |
| H | -9.67587800 | 6.43530200  | -0.74470000 |
| H | -9.23673200 | 4.92861500  | -1.57261300 |
| H | -8.49424100 | 6.45371200  | -2.06905700 |
| C | -4.50694400 | 8.53810000  | 5.27205200  |
| C | -4.11496800 | 7.22848300  | 5.95869600  |
| C | -4.42762900 | 9.70587200  | 6.25000900  |
| H | -5.55531000 | 8.44729900  | 4.95399000  |
| H | -4.22178800 | 6.36900200  | 5.27880000  |
| H | -4.74584900 | 7.04918000  | 6.83859900  |
| H | -3.06943900 | 7.26246600  | 6.29501200  |
| H | -4.66873700 | 10.65814900 | 5.76300500  |
| H | -3.42898800 | 9.79780500  | 6.69552200  |

|   |             |             |             |
|---|-------------|-------------|-------------|
| H | -5.13734100 | 9.55609000  | 7.07233900  |
| C | -3.82553500 | 8.29686400  | 0.20799100  |
| C | -3.62181400 | 9.46016100  | -0.75884100 |
| C | -3.15209100 | 7.02899100  | -0.31932900 |
| H | -4.90578300 | 8.10123000  | 0.26583700  |
| H | -4.08900400 | 10.38027600 | -0.38789800 |
| H | -4.06466300 | 9.22390400  | -1.73388900 |
| H | -2.55646700 | 9.66561000  | -0.92430500 |
| H | -3.32859600 | 6.17042200  | 0.34709200  |
| H | -2.06629800 | 7.16825900  | -0.40809200 |
| H | -3.53986300 | 6.77117400  | -1.31305300 |

**SMD-M06/6-31G(d,p)/SDD**

Electronic Energy (0K) = -2516.335625

Electronic Energy (0K) + ZPE = -2515.490816

Enthalpy (298K) = -2515.438657

Free Energy (298K) = -2515.576711

**SMD-M06/6-311+G(d,p)/SDD**

Electronic Energy (0K) = -2516.808748

**TS<sub>A</sub>'**

Number of imaginary frequencies: 1

|   |             |            |            |
|---|-------------|------------|------------|
| C | -3.67905700 | 2.45005000 | 2.66816200 |
| C | -3.19539500 | 3.58283600 | 3.08683200 |
| C | -1.97310900 | 3.89991000 | 3.82387400 |
| C | -1.22865800 | 5.03897800 | 3.48285100 |
| C | -1.57450800 | 3.13478800 | 4.92856800 |
| C | -0.09322500 | 5.38183900 | 4.20621600 |
| H | -1.55175600 | 5.64829300 | 2.63784000 |
| C | -0.45108300 | 3.49555700 | 5.66369200 |
| H | -2.16193100 | 2.26613600 | 5.21789400 |

|    |             |             |             |
|----|-------------|-------------|-------------|
| C  | 0.29590600  | 4.61381000  | 5.30198700  |
| H  | 0.47862300  | 6.26306700  | 3.92330400  |
| H  | -0.15869100 | 2.90027300  | 6.52590100  |
| H  | 1.17481000  | 4.89244000  | 5.87888200  |
| N  | -4.74192000 | 1.80089300  | 2.22354400  |
| S  | -4.91003000 | 1.52440900  | 0.51906000  |
| O  | -6.34398000 | 1.37426200  | 0.32470200  |
| O  | -4.14997500 | 2.56971000  | -0.14505300 |
| C  | -5.88693400 | 1.50021700  | 3.09991900  |
| H  | -5.52596900 | 1.53555900  | 4.13081900  |
| H  | -6.68053700 | 2.24584700  | 2.96137400  |
| Au | -4.55201400 | 5.14890700  | 2.69276800  |
| H  | -6.27670900 | 0.49938300  | 2.89249200  |
| C  | -4.10792600 | -0.02387100 | 0.24444200  |
| C  | -4.77433900 | -1.20276400 | 0.58067100  |
| C  | -2.81741900 | -0.03614700 | -0.27762000 |
| C  | -4.12221000 | -2.41171800 | 0.39005000  |
| H  | -5.78986800 | -1.17405000 | 0.96954900  |
| C  | -2.18731600 | -1.25980900 | -0.46783600 |
| H  | -2.31793700 | 0.89610000  | -0.53044400 |
| C  | -2.82595100 | -2.45917300 | -0.13950400 |
| H  | -4.62788500 | -3.34171500 | 0.64484200  |
| H  | -1.17901200 | -1.28620400 | -0.87788900 |
| C  | -2.15027300 | -3.77446000 | -0.36451700 |
| H  | -2.36122700 | -4.47705300 | 0.44975900  |
| H  | -2.51259300 | -4.24079500 | -1.28993400 |
| H  | -1.06522400 | -3.65993400 | -0.45632900 |
| C  | -5.80860200 | 6.75656100  | 2.45960400  |
| C  | -6.54436100 | 8.88339300  | 2.32019900  |
| C  | -7.63256300 | 8.07447600  | 2.32503300  |

|   |             |            |            |
|---|-------------|------------|------------|
| H | -6.44745100 | 9.95881000 | 2.26469200 |
| H | -8.69064300 | 8.29159000 | 2.27347600 |
| N | -7.15842400 | 6.77398500 | 2.40604300 |
| N | -5.43693400 | 8.05445200 | 2.40711900 |
| C | -4.06446600 | 8.47918700 | 2.44976100 |
| C | -3.49359800 | 8.76103700 | 3.69959500 |
| C | -3.34627300 | 8.53723600 | 1.24725900 |
| C | -2.14594100 | 9.12500400 | 3.71984500 |
| C | -2.00273300 | 8.91188600 | 1.32222800 |
| C | -1.40905300 | 9.20342600 | 2.54401900 |
| H | -1.66456900 | 9.34088700 | 4.67225100 |
| H | -1.41219500 | 8.96446400 | 0.40896600 |
| H | -0.36014600 | 9.49010000 | 2.58115200 |
| C | -7.96168200 | 5.58339700 | 2.45535000 |
| C | -8.26990500 | 5.03845400 | 3.70898300 |
| C | -8.35327200 | 4.99528500 | 1.24346800 |
| C | -9.00519000 | 3.85040900 | 3.72589800 |
| C | -9.07293600 | 3.80159600 | 1.31525500 |
| C | -9.39856700 | 3.23667300 | 2.54329700 |
| H | -9.26492100 | 3.39797400 | 4.68195600 |
| H | -9.37753900 | 3.30366700 | 0.39656900 |
| H | -9.96409400 | 2.30787100 | 2.57722700 |
| C | -7.81907400 | 5.66877400 | 5.01039000 |
| C | -9.00904600 | 6.01835400 | 5.90002400 |
| C | -6.83578200 | 4.75678300 | 5.74253500 |
| H | -7.29247800 | 6.60668200 | 4.78030300 |
| H | -9.71364900 | 6.68182300 | 5.38368000 |
| H | -8.66872600 | 6.52635700 | 6.81054100 |
| H | -9.55777000 | 5.11910600 | 6.20863100 |
| H | -5.95223600 | 4.54330200 | 5.12116500 |

|   |              |             |             |
|---|--------------|-------------|-------------|
| H | -7.30394500  | 3.79850400  | 6.00542400  |
| H | -6.49469700  | 5.22676800  | 6.67357100  |
| C | -7.95847000  | 5.58337300  | -0.09473800 |
| C | -6.74014800  | 4.84315500  | -0.64552000 |
| C | -9.09971400  | 5.56861100  | -1.10607200 |
| H | -7.67124300  | 6.63309000  | 0.06319400  |
| H | -5.89666000  | 4.87292000  | 0.05956700  |
| H | -6.41304100  | 5.28594600  | -1.59520400 |
| H | -6.98126000  | 3.78716400  | -0.82719500 |
| H | -10.00119700 | 6.05233600  | -0.71147500 |
| H | -9.36642400  | 4.54652700  | -1.40350500 |
| H | -8.79961700  | 6.10120000  | -2.01643600 |
| C | -4.26683200  | 8.61952900  | 4.99428200  |
| C | -3.83094200  | 7.35442100  | 5.73516500  |
| C | -4.12551500  | 9.84641600  | 5.88987800  |
| H | -5.33349300  | 8.51022000  | 4.74980500  |
| H | -3.99300000  | 6.45523200  | 5.12114200  |
| H | -4.39702700  | 7.24040800  | 6.66863100  |
| H | -2.76302900  | 7.39745100  | 5.99045800  |
| H | -4.40547200  | 10.76650400 | 5.36303400  |
| H | -3.09751400  | 9.96564200  | 6.25503400  |
| H | -4.77328100  | 9.74822400  | 6.76926200  |
| C | -3.95422800  | 8.15796300  | -0.08692700 |
| C | -3.80189400  | 9.27157900  | -1.11897400 |
| C | -3.33887600  | 6.85405900  | -0.59605900 |
| H | -5.03117400  | 7.98627600  | 0.05663400  |
| H | -4.23793400  | 10.21282800 | -0.76307100 |
| H | -4.30626200  | 8.99515000  | -2.05278900 |
| H | -2.74711600  | 9.45776200  | -1.35830300 |
| H | -3.47343400  | 6.03498100  | 0.12707800  |



|   |             |             |             |
|---|-------------|-------------|-------------|
| H | -2.26130400 | 6.97214700  | -0.77279800 |
| H | -3.80135800 | 6.55213600  | -1.54422800 |
| C | -1.43904700 | -1.07491100 | 2.93659500  |
| C | -0.52802200 | -0.13380300 | 2.45101200  |
| C | 0.74999700  | -0.45789800 | 2.00940200  |
| C | 1.07736000  | -1.80275700 | 2.07307000  |
| C | 0.17723100  | -2.77545000 | 2.55604500  |
| C | -1.08754900 | -2.43096000 | 2.99296100  |
| C | -2.59232900 | -0.29544600 | 3.22488900  |
| H | 1.43738000  | 0.29471300  | 1.63635100  |
| H | 2.06226400  | -2.11983100 | 1.73895300  |
| H | 0.49026600  | -3.81595400 | 2.57933000  |
| H | -1.78737900 | -3.17724500 | 3.35962500  |
| H | -3.56281100 | -0.59822400 | 3.60548900  |
| O | -1.08765900 | 1.09909800  | 2.46050900  |
| N | -2.36985900 | 0.96062700  | 2.95036300  |

**SMD-M06/6-31G(d,p)/SDD**

Electronic Energy (0K) = -2915.748406

Electronic Energy (0K) + ZPE = -2914.797481

Enthalpy (298K) = -2914.738603

Free Energy (298K) = -2914.891233

**SMD-M06/6-311+G(d,p)/SDD**

Electronic Energy (0K) = -2916.317494

**A'**

Number of imaginary frequencies: 0

|   |             |            |            |
|---|-------------|------------|------------|
| C | -3.58616900 | 2.22474400 | 2.73926500 |
| C | -3.28404500 | 3.49304100 | 3.07822400 |
| C | -2.00434500 | 3.84614600 | 3.72018100 |
| C | -1.29680200 | 4.97218000 | 3.26882200 |

|    |             |             |             |
|----|-------------|-------------|-------------|
| C  | -1.49026300 | 3.13486500  | 4.81528000  |
| C  | -0.10129200 | 5.35083000  | 3.86603000  |
| H  | -1.69798000 | 5.54981500  | 2.43470800  |
| C  | -0.30730100 | 3.53343200  | 5.42964300  |
| H  | -2.03600300 | 2.27655300  | 5.20524700  |
| C  | 0.39654300  | 4.63629300  | 4.95365000  |
| H  | 0.43335000  | 6.22161400  | 3.49164700  |
| H  | 0.06544000  | 2.97780800  | 6.28763100  |
| H  | 1.32204900  | 4.94408700  | 5.43487100  |
| N  | -4.81669700 | 1.71708900  | 2.27314000  |
| S  | -4.95205200 | 1.49963500  | 0.59100900  |
| O  | -6.38066800 | 1.37247800  | 0.32286100  |
| O  | -4.15312400 | 2.50108900  | -0.10734300 |
| C  | -6.05428600 | 1.99572200  | 3.01237700  |
| H  | -5.80643100 | 1.96222100  | 4.07732200  |
| H  | -6.47832500 | 2.98149300  | 2.77430200  |
| Au | -4.60903900 | 5.06629600  | 2.76067900  |
| H  | -6.79542700 | 1.22129400  | 2.79639500  |
| C  | -4.16986500 | -0.07430700 | 0.34358800  |
| C  | -4.76450300 | -1.21312300 | 0.88979100  |
| C  | -2.97214900 | -0.14843500 | -0.35778000 |
| C  | -4.13681900 | -2.43828200 | 0.72992500  |
| H  | -5.70258300 | -1.13747100 | 1.43770100  |
| C  | -2.35670800 | -1.38817300 | -0.50664300 |
| H  | -2.52590500 | 0.75183000  | -0.77336800 |
| C  | -2.92511500 | -2.54413500 | 0.03200900  |
| H  | -4.58749800 | -3.33518400 | 1.15230100  |
| H  | -1.41436900 | -1.45805600 | -1.04793200 |
| C  | -2.26867900 | -3.87784600 | -0.13815300 |
| H  | -2.30047500 | -4.46044400 | 0.78997500  |

|   |              |             |             |
|---|--------------|-------------|-------------|
| H | -2.78696600  | -4.47052300 | -0.90300700 |
| H | -1.22422900  | -3.77671300 | -0.45074700 |
| C | -5.83185600  | 6.71678600  | 2.51492200  |
| C | -6.50492500  | 8.86546000  | 2.33928100  |
| C | -7.61308500  | 8.08612800  | 2.29026700  |
| H | -6.37611200  | 9.93779800  | 2.28761700  |
| H | -8.66132300  | 8.33125800  | 2.18829800  |
| N | -7.17764200  | 6.77366900  | 2.39522200  |
| N | -5.42607800  | 8.00670300  | 2.48113200  |
| C | -4.04627100  | 8.40021900  | 2.56359700  |
| C | -3.50327100  | 8.67772100  | 3.82699800  |
| C | -3.29415100  | 8.44159500  | 1.38125800  |
| C | -2.15025000  | 9.01696300  | 3.88238800  |
| C | -1.94469600  | 8.78567100  | 1.49171500  |
| C | -1.37903400  | 9.07256100  | 2.72755900  |
| H | -1.69140100  | 9.22993900  | 4.84636400  |
| H | -1.32902400  | 8.82329000  | 0.59435300  |
| H | -0.32586000  | 9.33821800  | 2.79262400  |
| C | -8.01912400  | 5.60847900  | 2.40460800  |
| C | -8.42515900  | 5.08872300  | 3.64142400  |
| C | -8.35749400  | 5.02082700  | 1.17623500  |
| C | -9.19328800  | 3.92180500  | 3.62398200  |
| C | -9.11926400  | 3.85185300  | 1.21481700  |
| C | -9.53362400  | 3.30828300  | 2.42513900  |
| H | -9.52301000  | 3.48651100  | 4.56620800  |
| H | -9.38597300  | 3.35633700  | 0.28315600  |
| H | -10.12733500 | 2.39656400  | 2.43272000  |
| C | -8.03615100  | 5.72025600  | 4.96242800  |
| C | -9.26008400  | 6.03198100  | 5.81936600  |
| C | -7.05385700  | 4.82730200  | 5.71963400  |

|   |             |             |             |
|---|-------------|-------------|-------------|
| H | -7.52683600 | 6.67291900  | 4.75627100  |
| H | -9.97477400 | 6.66822800  | 5.28347700  |
| H | -8.95938200 | 6.55549400  | 6.73499400  |
| H | -9.78502700 | 5.11663300  | 6.12156300  |
| H | -6.13769300 | 4.65486400  | 5.13439200  |
| H | -7.50298400 | 3.85011900  | 5.94452600  |
| H | -6.76882600 | 5.29088100  | 6.67263600  |
| C | -7.86582800 | 5.57991000  | -0.14257600 |
| C | -6.63954100 | 4.79872700  | -0.61491900 |
| C | -8.94576200 | 5.58769400  | -1.21939800 |
| H | -7.55710700 | 6.62256100  | 0.02213200  |
| H | -5.83192200 | 4.82251400  | 0.13113000  |
| H | -6.25362200 | 5.21587800  | -1.55430300 |
| H | -6.88938300 | 3.74306700  | -0.78853500 |
| H | -9.85520700 | 6.09961400  | -0.88268700 |
| H | -9.22285800 | 4.57086900  | -1.52542800 |
| H | -8.57754400 | 6.10376000  | -2.11417000 |
| C | -4.31199400 | 8.55251900  | 5.10124700  |
| C | -3.93887600 | 7.26304800  | 5.83471700  |
| C | -4.14761000 | 9.76069700  | 6.01800600  |
| H | -5.37545400 | 8.48694100  | 4.82939500  |
| H | -4.11671000 | 6.37821700  | 5.20490600  |
| H | -4.52857000 | 7.15675600  | 6.75442600  |
| H | -2.87552000 | 7.26648700  | 6.11269500  |
| H | -4.37490300 | 10.69877900 | 5.49767600  |
| H | -3.12729600 | 9.83345900  | 6.41555600  |
| H | -4.82458200 | 9.67643700  | 6.87661600  |
| C | -3.87480900 | 8.08697700  | 0.02811300  |
| C | -3.68666200 | 9.21723000  | -0.97993700 |
| C | -3.26388900 | 6.78474000  | -0.48918300 |

|   |             |             |             |
|---|-------------|-------------|-------------|
| H | -4.95653600 | 7.92565800  | 0.14419900  |
| H | -4.11896700 | 10.15703800 | -0.61526500 |
| H | -4.17404600 | 8.96490100  | -1.92946500 |
| H | -2.62466000 | 9.39480000  | -1.19277600 |
| H | -3.44205100 | 5.95194500  | 0.20800200  |
| H | -2.17833700 | 6.88529300  | -0.62307200 |
| H | -3.69574200 | 6.51471200  | -1.46107300 |
| C | -1.48577200 | -0.74993300 | 2.88818500  |
| C | -0.74256900 | 0.20741400  | 2.18375100  |
| C | 0.50531600  | -0.04011300 | 1.62873700  |
| C | 0.97856000  | -1.33015100 | 1.80200400  |
| C | 0.25011500  | -2.32101700 | 2.49720000  |
| C | -0.98436700 | -2.05266000 | 3.04881300  |
| C | -2.66538900 | -0.07450300 | 3.25257100  |
| H | 1.05836600  | 0.72367000  | 1.09218200  |
| H | 1.94728500  | -1.59141000 | 1.38398100  |
| H | 0.67735000  | -3.31524000 | 2.59286700  |
| H | -1.55326700 | -2.80931300 | 3.58112700  |
| H | -3.54226800 | -0.40144600 | 3.80088300  |
| O | -1.42461600 | 1.37480100  | 2.11343100  |
| N | -2.60011200 | 1.16124100  | 2.80057600  |

**SMD-M06/6-31G(d,p)/SDD**

Electronic Energy (0K) = -2915.770847

Electronic Energy (0K) + ZPE = -2914.818473

Enthalpy (298K) = -2914.759606

Free Energy (298K) = -2914.913171

**SMD-M06/6-311+G(d,p)/SDD**

Electronic Energy (0K) = -2916.337810

**TS<sub>B'</sub>**

Number of imaginary frequencies: 1

|    |             |             |             |
|----|-------------|-------------|-------------|
| C  | -3.25086100 | 2.34656500  | 2.71979100  |
| C  | -2.95700500 | 3.70241200  | 2.88354600  |
| C  | -1.62272600 | 4.16943500  | 3.21498300  |
| C  | -1.48230000 | 5.32830500  | 4.00998300  |
| C  | -0.45111500 | 3.55737700  | 2.72166100  |
| C  | -0.23100900 | 5.81188500  | 4.35449900  |
| H  | -2.37892200 | 5.83384900  | 4.36797500  |
| C  | 0.79848300  | 4.07471200  | 3.03058000  |
| H  | -0.52850700 | 2.69989600  | 2.06057300  |
| C  | 0.91431700  | 5.18869000  | 3.85954300  |
| H  | -0.14769300 | 6.68957400  | 4.99193100  |
| H  | 1.69020500  | 3.60522400  | 2.62246700  |
| H  | 1.89759800  | 5.58221100  | 4.10680600  |
| N  | -4.48529900 | 1.89203400  | 2.17634400  |
| S  | -4.60938600 | 1.73939000  | 0.51584900  |
| O  | -6.03935100 | 1.69109700  | 0.22534300  |
| O  | -3.75740200 | 2.73914900  | -0.12085300 |
| C  | -5.68819000 | 1.87247300  | 3.01095600  |
| H  | -5.39079800 | 1.58280700  | 4.02575300  |
| H  | -6.17529500 | 2.85851000  | 3.04510900  |
| Au | -4.46597600 | 5.11473300  | 2.72226200  |
| H  | -6.40239900 | 1.13552600  | 2.63555500  |
| C  | -3.90854200 | 0.14413900  | 0.17742100  |
| C  | -4.34351200 | -0.95612700 | 0.91315100  |
| C  | -2.94130800 | 0.01446400  | -0.81297400 |
| C  | -3.78311700 | -2.19989300 | 0.65956300  |
| H  | -5.09537700 | -0.83975100 | 1.69265200  |
| C  | -2.39825000 | -1.24009200 | -1.06031700 |
| H  | -2.60678800 | 0.88921200  | -1.36434500 |

|   |             |             |             |
|---|-------------|-------------|-------------|
| C | -2.80372700 | -2.35941600 | -0.32731700 |
| H | -4.09701400 | -3.06397000 | 1.24375400  |
| H | -1.63073200 | -1.35326200 | -1.82474800 |
| C | -2.20002000 | -3.70228900 | -0.59313800 |
| H | -2.25458200 | -4.34868900 | 0.28967000  |
| H | -2.72977700 | -4.21551800 | -1.40636000 |
| H | -1.15069500 | -3.61525000 | -0.89788800 |
| C | -5.83744800 | 6.66662900  | 2.59600300  |
| C | -6.63647700 | 8.77726000  | 2.50811000  |
| C | -7.69016300 | 7.93560900  | 2.37035400  |
| H | -6.57436100 | 9.85674500  | 2.52443600  |
| H | -8.74728000 | 8.12134500  | 2.23836200  |
| N | -7.17797800 | 6.64838300  | 2.42083800  |
| N | -5.51366500 | 7.97972000  | 2.65340500  |
| C | -4.16884200 | 8.45511200  | 2.82903800  |
| C | -3.73994800 | 8.77763200  | 4.12540500  |
| C | -3.33527400 | 8.52941200  | 1.70450400  |
| C | -2.41523100 | 9.19135900  | 4.27615700  |
| C | -2.02062300 | 8.95453000  | 1.90921300  |
| C | -1.56495300 | 9.28106900  | 3.17991800  |
| H | -2.04088800 | 9.43969800  | 5.26795100  |
| H | -1.34584100 | 9.02715300  | 1.05766900  |
| H | -0.53595100 | 9.60615400  | 3.31881200  |
| C | -7.96027500 | 5.44522100  | 2.34184600  |
| C | -8.35011200 | 4.82457500  | 3.53638300  |
| C | -8.28073700 | 4.94170700  | 1.07143200  |
| C | -9.08011800 | 3.63777700  | 3.43104400  |
| C | -9.01101800 | 3.75392700  | 1.02306200  |
| C | -9.40361000 | 3.10696200  | 2.18946800  |
| H | -9.39767800 | 3.12456600  | 4.33758800  |

|   |             |             |             |
|---|-------------|-------------|-------------|
| H | -9.27093100 | 3.32434200  | 0.05780000  |
| H | -9.97146200 | 2.18099300  | 2.12808800  |
| C | -7.99720300 | 5.37756100  | 4.90234600  |
| C | -9.24245100 | 5.59122700  | 5.75859600  |
| C | -6.99652400 | 4.46887100  | 5.61545000  |
| H | -7.51871500 | 6.35861600  | 4.76703000  |
| H | -9.96983500 | 6.23954000  | 5.25531900  |
| H | -8.97220700 | 6.06012000  | 6.71252800  |
| H | -9.74101600 | 4.64091100  | 5.98857500  |
| H | -6.06443400 | 4.36941700  | 5.03903500  |
| H | -7.41219600 | 3.46222400  | 5.76175300  |
| H | -6.74658700 | 4.87317900  | 6.60450200  |
| C | -7.80681900 | 5.62087900  | -0.19729800 |
| C | -6.47242900 | 5.02311200  | -0.64662600 |
| C | -8.82559800 | 5.54834300  | -1.32909500 |
| H | -7.64029400 | 6.68446300  | 0.02779800  |
| H | -5.70585700 | 5.10413200  | 0.13772700  |
| H | -6.10367800 | 5.53552100  | -1.54490700 |
| H | -6.58491100 | 3.95575900  | -0.87977100 |
| H | -9.81380000 | 5.90648600  | -1.01642700 |
| H | -8.93880800 | 4.52453300  | -1.70782000 |
| H | -8.49131500 | 6.16628200  | -2.17083700 |
| C | -4.63761200 | 8.61798300  | 5.33505800  |
| C | -4.28699000 | 7.33028700  | 6.08159400  |
| C | -4.57826700 | 9.81753300  | 6.27505300  |
| H | -5.67530100 | 8.52627300  | 4.98485800  |
| H | -4.37990700 | 6.44886100  | 5.42969700  |
| H | -4.95090900 | 7.19066700  | 6.94435400  |
| H | -3.25322800 | 7.36699300  | 6.45421900  |
| H | -4.78651700 | 10.75626100 | 5.74821200  |



|   |             |             |             |
|---|-------------|-------------|-------------|
| H | -3.59658000 | 9.91088700  | 6.75641900  |
| H | -5.32058400 | 9.70502500  | 7.07433000  |
| C | -3.80472800 | 8.16636600  | 0.31128600  |
| C | -3.79938000 | 9.39062600  | -0.60090300 |
| C | -2.96404100 | 7.03458500  | -0.27577300 |
| H | -4.84229500 | 7.80781200  | 0.37441200  |
| H | -4.42974100 | 10.19240900 | -0.19585100 |
| H | -4.17964600 | 9.12898500  | -1.59593200 |
| H | -2.78488500 | 9.79079600  | -0.72657700 |
| H | -2.97675500 | 6.14764900  | 0.37581200  |
| H | -1.91802700 | 7.34022200  | -0.40860100 |
| H | -3.35049500 | 6.73961300  | -1.25926400 |
| C | -1.88023400 | -0.83785100 | 3.52941200  |
| C | -1.14064500 | -0.53095300 | 2.34762700  |
| C | -0.26538100 | -1.49740300 | 1.80504100  |
| C | -0.21494700 | -2.72779200 | 2.41994600  |
| C | -0.97223900 | -3.04315800 | 3.57847700  |
| C | -1.79655800 | -2.10611300 | 4.14552400  |
| C | -2.60072400 | 0.29787000  | 3.88186800  |
| H | 0.30944500  | -1.26892400 | 0.91229600  |
| H | 0.43150500  | -3.49493100 | 1.99808000  |
| H | -0.88056000 | -4.03195300 | 4.01819600  |
| H | -2.37542800 | -2.31818800 | 5.04063000  |
| H | -3.27473700 | 0.38325900  | 4.73463600  |
| O | -1.34002400 | 0.65224000  | 1.87479300  |
| N | -2.41647100 | 1.37345500  | 3.14081600  |

**SMD-M06/6-31G(d,p)/SDD**

Electronic Energy (0K) = -2915.745471

Electronic Energy (0K) + ZPE = -2914.796540

Enthalpy (298K) = -2914.737204

Free Energy (298K) = -2914.892491

**SMD-M06/6-311+G(d,p)/SDD**

Electronic Energy (0K) = -2916.312393

**B'**

Number of imaginary frequencies: 0

|   |             |            |            |
|---|-------------|------------|------------|
| C | -5.22857100 | 3.47865300 | 2.90081700 |
| C | -3.81618400 | 3.55519500 | 2.46609100 |
| C | -2.80177600 | 3.16388600 | 3.37533000 |
| C | -1.56811600 | 2.69652600 | 2.84863000 |
| C | -2.98993600 | 3.14011300 | 4.78395700 |
| C | -0.59559400 | 2.18309800 | 3.68242700 |
| H | -1.42601200 | 2.70624700 | 1.76763800 |
| C | -1.98957300 | 2.67388900 | 5.61413100 |
| H | -3.91762200 | 3.51368600 | 5.21175800 |
| C | -0.80491200 | 2.17724400 | 5.06408100 |
| H | 0.33044500  | 1.79571300 | 3.26549400 |
| H | -2.12884700 | 2.67828600 | 6.69138300 |
| H | -0.03312400 | 1.78459600 | 5.72204800 |
| N | -6.09107200 | 4.49240100 | 2.57779100 |
| S | -7.79411000 | 4.18944700 | 2.52897900 |
| O | -8.34438400 | 5.43682100 | 2.01974400 |
| O | -8.01461700 | 2.94467000 | 1.81497800 |
| C | -5.60985000 | 5.83214100 | 2.22751500 |
| H | -6.35322000 | 6.57000600 | 2.53548900 |
| H | -4.68472600 | 6.03176900 | 2.77573700 |
| H | -5.43585000 | 5.92850400 | 1.14743000 |
| C | -8.25225900 | 4.00698800 | 4.22396300 |
| C | -8.25175600 | 5.14304500 | 5.03236400 |
| C | -8.61603600 | 2.75779000 | 4.71647700 |

|    |              |             |             |
|----|--------------|-------------|-------------|
| C  | -8.61928300  | 5.01306500  | 6.36249600  |
| H  | -7.97255000  | 6.11296800  | 4.62584600  |
| C  | -8.98858600  | 2.65213400  | 6.05019200  |
| H  | -8.60434700  | 1.88835300  | 4.06443000  |
| C  | -8.99581800  | 3.77087600  | 6.88875800  |
| H  | -8.62181600  | 5.88901200  | 7.00895700  |
| H  | -9.27955100  | 1.68291600  | 6.45115200  |
| C  | -9.42255900  | 3.65436700  | 8.31734500  |
| H  | -9.32372600  | 2.62812600  | 8.68517900  |
| H  | -8.83776400  | 4.31644000  | 8.96508000  |
| H  | -10.47563600 | 3.94329300  | 8.42976500  |
| C  | -2.99910000  | 4.79331800  | -1.39494000 |
| C  | -2.05291000  | 4.97255400  | -3.43414700 |
| C  | -3.02847000  | 5.91173000  | -3.35166600 |
| H  | -1.36442000  | 4.71878200  | -4.22835000 |
| H  | -3.37317500  | 6.65459500  | -4.05756500 |
| N  | -2.05156300  | 4.30170900  | -2.22319600 |
| N  | -3.59492600  | 5.78485400  | -2.09323700 |
| Au | -3.42244500  | 4.13496700  | 0.51434200  |
| C  | -4.38940200  | 0.30564200  | 3.23781000  |
| C  | -3.93756600  | 0.46982200  | 1.86067900  |
| C  | -3.03614000  | -0.53456500 | 1.35940000  |
| C  | -2.66636500  | -1.60263700 | 2.12589100  |
| C  | -3.14408600  | -1.77403500 | 3.45795700  |
| C  | -3.98079900  | -0.84077300 | 3.99149000  |
| C  | -5.14425500  | 1.26694700  | 3.90118000  |
| H  | -2.66627800  | -0.40374800 | 0.34308800  |
| H  | -1.98422300  | -2.34522500 | 1.71466700  |
| H  | -2.83012300  | -2.63752100 | 4.03779800  |
| H  | -4.34395800  | -0.93626300 | 5.01473300  |

|   |             |             |             |
|---|-------------|-------------|-------------|
| H | -5.40501600 | 1.03175700  | 4.94063900  |
| O | -4.30221900 | 1.44802400  | 1.16075400  |
| N | -5.67031600 | 2.41774100  | 3.49159200  |
| C | -4.66235600 | 6.59538800  | -1.57207800 |
| C | -5.98147400 | 6.14327400  | -1.72211100 |
| C | -4.32863000 | 7.78490300  | -0.90764100 |
| C | -6.99365400 | 6.93429000  | -1.17326200 |
| C | -5.37840400 | 8.53951400  | -0.38012800 |
| C | -6.69671600 | 8.11957400  | -0.51257000 |
| H | -8.02966900 | 6.61262300  | -1.26173100 |
| H | -5.15816000 | 9.46570900  | 0.14820600  |
| H | -7.50109400 | 8.71906200  | -0.09154600 |
| C | -1.21981600 | 3.18786900  | -1.86334200 |
| C | -0.03096400 | 3.43883400  | -1.16445100 |
| C | -1.67922300 | 1.89792700  | -2.16679200 |
| C | 0.71283800  | 2.33068200  | -0.75213000 |
| C | -0.89233300 | 0.82552000  | -1.74188700 |
| C | 0.28567000  | 1.03871200  | -1.03486500 |
| H | 1.63863300  | 2.48465300  | -0.19969000 |
| H | -1.20956400 | -0.19177600 | -1.96699400 |
| H | 0.88052700  | 0.18854800  | -0.70769100 |
| C | -2.89219200 | 8.21454300  | -0.69157100 |
| C | -2.46808800 | 7.91091300  | 0.74642100  |
| C | -2.66574300 | 9.68637000  | -1.02034300 |
| H | -2.24896800 | 7.62393300  | -1.35986200 |
| H | -2.57312400 | 6.84011900  | 0.97832900  |
| H | -1.42111000 | 8.19670900  | 0.90985800  |
| H | -3.08625900 | 8.47397800  | 1.45976600  |
| H | -2.99347100 | 9.92929300  | -2.03798500 |
| H | -3.20330800 | 10.34487000 | -0.32657300 |

|   |             |             |             |
|---|-------------|-------------|-------------|
| H | -1.59975000 | 9.93035400  | -0.93928000 |
| C | -6.32047200 | 4.82855200  | -2.39326900 |
| C | -7.41697800 | 4.98284100  | -3.44314200 |
| C | -6.72079700 | 3.78849400  | -1.34595000 |
| H | -5.42021700 | 4.46049300  | -2.90648400 |
| H | -7.16384200 | 5.74944700  | -4.18525000 |
| H | -7.56735900 | 4.03403100  | -3.97194700 |
| H | -8.37717300 | 5.25654300  | -2.98763200 |
| H | -5.91581700 | 3.61780900  | -0.61465800 |
| H | -7.61377900 | 4.11098800  | -0.79290000 |
| H | -6.94976100 | 2.82666700  | -1.82269300 |
| C | -2.95497500 | 1.65363700  | -2.94613400 |
| C | -3.89395700 | 0.68624400  | -2.23198100 |
| C | -2.62594800 | 1.16125400  | -4.35432900 |
| H | -3.48817300 | 2.61034000  | -3.04501100 |
| H | -4.13002000 | 1.02590000  | -1.21336300 |
| H | -4.83294600 | 0.59574800  | -2.79261000 |
| H | -3.45968400 | -0.32050700 | -2.16314100 |
| H | -1.98606400 | 1.87232000  | -4.89200900 |
| H | -2.10035500 | 0.19765300  | -4.31940300 |
| H | -3.54412000 | 1.02053600  | -4.93771800 |
| C | 0.43568800  | 4.83987000  | -0.82605300 |
| C | 1.84888400  | 5.10077000  | -1.33972900 |
| C | 0.34927600  | 5.09394000  | 0.67824400  |
| H | -0.23408900 | 5.55691700  | -1.32283900 |
| H | 1.92441400  | 4.92119900  | -2.41888200 |
| H | 2.13672800  | 6.14137200  | -1.14720400 |
| H | 2.58453900  | 4.45831800  | -0.83914100 |
| H | -0.67809400 | 4.95788800  | 1.04808200  |
| H | 1.00332200  | 4.40650600  | 1.23273300  |

H 0.66562500 6.11788800 0.91400900

**SMD-M06/6-31G(d,p)/SDD**

Electronic Energy (0K) = -2915.773544

Electronic Energy (0K) + ZPE = -2914.824275

Enthalpy (298K) = -2914.763985

Free Energy (298K) = -2914.921226

**SMD-M06/6-311+G(d,p)/SDD**

Electronic Energy (0K) = -2916.341179

**TS<sub>C2'</sub>**

Number of imaginary frequencies: 1

|   |             |            |            |
|---|-------------|------------|------------|
| C | -5.23652200 | 3.44679800 | 2.90144600 |
| C | -3.82515000 | 3.51025800 | 2.44816600 |
| C | -2.80197400 | 3.13317400 | 3.35922200 |
| C | -1.56541700 | 2.67732300 | 2.83168400 |
| C | -2.98067300 | 3.12529300 | 4.76810200 |
| C | -0.58089200 | 2.18772000 | 3.66560300 |
| H | -1.42920200 | 2.67612800 | 1.74994300 |
| C | -1.96768400 | 2.68443400 | 5.59863900 |
| H | -3.90936600 | 3.49248500 | 5.19885400 |
| C | -0.78078700 | 2.19589000 | 5.04882100 |
| H | 0.34802200  | 1.80864200 | 3.24722900 |
| H | -2.10110100 | 2.70230100 | 6.67654800 |
| H | 0.00052300  | 1.82224900 | 5.70659800 |
| N | -6.09376000 | 4.46156900 | 2.57208300 |
| S | -7.79990000 | 4.16473800 | 2.53236100 |
| O | -8.34549600 | 5.40729600 | 2.00684600 |
| O | -8.02124100 | 2.91144900 | 1.83362400 |
| C | -5.61278300 | 5.80043700 | 2.21767600 |
| H | -6.35160500 | 6.53935900 | 2.53437200 |

|    |              |             |             |
|----|--------------|-------------|-------------|
| H  | -4.68196200  | 5.99860300  | 2.75634200  |
| H  | -5.45147300  | 5.89827600  | 1.13594600  |
| C  | -8.26219600  | 4.00611000  | 4.22843200  |
| C  | -8.26638900  | 5.15343900  | 5.02058700  |
| C  | -8.62767600  | 2.76368600  | 4.73702900  |
| C  | -8.63948900  | 5.04186800  | 6.35099000  |
| H  | -7.98740100  | 6.11813900  | 4.60184000  |
| C  | -9.00636400  | 2.67669300  | 6.07013200  |
| H  | -8.61282500  | 1.88504300  | 4.09754600  |
| C  | -9.01776400  | 3.80717500  | 6.89298600  |
| H  | -8.64538200  | 5.92697700  | 6.98477000  |
| H  | -9.29886000  | 1.71309000  | 6.48331100  |
| C  | -9.45171400  | 3.70941200  | 8.32078100  |
| H  | -9.33855300  | 2.69148500  | 8.70726300  |
| H  | -8.88238200  | 4.39247900  | 8.96030800  |
| H  | -10.51033200 | 3.98216400  | 8.42113700  |
| C  | -2.99225400  | 4.80426500  | -1.39436000 |
| C  | -2.04731500  | 4.98454300  | -3.43386700 |
| C  | -3.02499500  | 5.92156100  | -3.35143500 |
| H  | -1.35838600  | 4.73219300  | -4.22816600 |
| H  | -3.37140000  | 6.66352400  | -4.05745000 |
| N  | -2.04395400  | 4.31421700  | -2.22255600 |
| N  | -3.59053900  | 5.79418500  | -2.09250800 |
| Au | -3.42050600  | 4.13426000  | 0.50752500  |
| C  | -4.41539900  | 0.29104300  | 3.26950300  |
| C  | -3.95425600  | 0.46340400  | 1.90062700  |
| C  | -3.09536000  | -0.56192400 | 1.37684200  |
| C  | -2.75969200  | -1.65494100 | 2.12617100  |
| C  | -3.23445400  | -1.82807900 | 3.45742900  |
| C  | -4.03851300  | -0.87466000 | 4.00745200  |

|   |             |             |             |
|---|-------------|-------------|-------------|
| C | -5.16550900 | 1.25552400  | 3.93758500  |
| H | -2.72347500 | -0.42695700 | 0.36193600  |
| H | -2.10463300 | -2.41342800 | 1.70036900  |
| H | -2.94548000 | -2.70851400 | 4.02455600  |
| H | -4.40128500 | -0.97172700 | 5.03061600  |
| H | -5.43265900 | 1.01277600  | 4.97358400  |
| O | -4.27817900 | 1.47446900  | 1.21999200  |
| N | -5.68395400 | 2.41063600  | 3.53455500  |
| C | -4.66036200 | 6.60113300  | -1.57076600 |
| C | -5.97798400 | 6.14322200  | -1.71625700 |
| C | -4.33003200 | 7.79302800  | -0.90876400 |
| C | -6.99232700 | 6.93277800  | -1.16924300 |
| C | -5.38168400 | 8.54507200  | -0.38149100 |
| C | -6.69884500 | 8.12088000  | -0.51223800 |
| H | -8.02726600 | 6.60725900  | -1.25613800 |
| H | -5.16398700 | 9.47279300  | 0.14516300  |
| H | -7.50478100 | 8.71909500  | -0.09241300 |
| C | -1.21041200 | 3.20201500  | -1.86160800 |
| C | -0.02058100 | 3.45561000  | -1.16536400 |
| C | -1.66996000 | 1.91076200  | -2.15908500 |
| C | 0.72549300  | 2.34917600  | -0.75255700 |
| C | -0.88228600 | 0.83995500  | -1.73163500 |
| C | 0.29833400  | 1.05603100  | -1.02992200 |
| H | 1.65253700  | 2.50536200  | -0.20286200 |
| H | -1.20080900 | -0.17814500 | -1.95117200 |
| H | 0.89467800  | 0.20732100  | -0.70172100 |
| C | -2.89465200 | 8.22595200  | -0.69247800 |
| C | -2.46918500 | 7.91560800  | 0.74378200  |
| C | -2.67195200 | 9.70006400  | -1.01326300 |
| H | -2.25036900 | 7.64047800  | -1.36428500 |



|   |             |             |             |
|---|-------------|-------------|-------------|
| H | -2.57028000 | 6.84315100  | 0.96974100  |
| H | -1.42331600 | 8.20442000  | 0.90896800  |
| H | -3.08961400 | 8.47227900  | 1.46019500  |
| H | -3.00242900 | 9.94832400  | -2.02872000 |
| H | -3.20900700 | 10.35362500 | -0.31442600 |
| H | -1.60625500 | 9.94559500  | -0.93316300 |
| C | -6.31448500 | 4.82458300  | -2.38095100 |
| C | -7.40019600 | 4.97575800  | -3.44251600 |
| C | -6.72828600 | 3.79245100  | -1.33078800 |
| H | -5.41067500 | 4.45026400  | -2.88306500 |
| H | -7.13505300 | 5.73394100  | -4.18909300 |
| H | -7.55176600 | 4.02317100  | -3.96417800 |
| H | -8.36269700 | 5.26003800  | -2.99843500 |
| H | -5.93341200 | 3.62812700  | -0.58698100 |
| H | -7.62913600 | 4.11804100  | -0.79262600 |
| H | -6.95058200 | 2.82709000  | -1.80344300 |
| C | -2.94881000 | 1.66260000  | -2.93186300 |
| C | -3.89017800 | 0.71083400  | -2.19995300 |
| C | -2.62714900 | 1.14852600  | -4.33389100 |
| H | -3.47715000 | 2.62048400  | -3.04305600 |
| H | -4.12008300 | 1.06657100  | -1.18529400 |
| H | -4.83214100 | 0.61677300  | -2.75488700 |
| H | -3.46051500 | -0.29689000 | -2.11781700 |
| H | -1.98559200 | 1.84907700  | -4.88323800 |
| H | -2.10645500 | 0.18276000  | -4.28759100 |
| H | -3.54801000 | 1.00461300  | -4.91223800 |
| C | 0.44284200  | 4.85760400  | -0.82678200 |
| C | 1.85541800  | 5.12278400  | -1.33977900 |
| C | 0.35532000  | 5.10938500  | 0.67792900  |
| H | -0.22887600 | 5.57334300  | -1.32289200 |

|   |             |            |             |
|---|-------------|------------|-------------|
| H | 1.93163100  | 4.94500100 | -2.41917700 |
| H | 2.14063100  | 6.16381500 | -1.14565900 |
| H | 2.59260700  | 4.48147400 | -0.83998000 |
| H | -0.67106000 | 4.96677300 | 1.04817400  |
| H | 1.01344100  | 4.42487500 | 1.23114900  |
| H | 0.66607800  | 6.13472200 | 0.91505100  |

**SMD-M06/6-31G(d,p)/SDD**

Electronic Energy (0K) = -2915.773521

Electronic Energy (0K) + ZPE = -2914.824445

Enthalpy (298K) = -2914.764948

Free Energy (298K) = -2914.919935

**SMD-M06/6-311+G(d,p)/SDD**

Electronic Energy (0K) = -2916.341072

**C2'**

Number of imaginary frequencies: 0

|   |             |            |            |
|---|-------------|------------|------------|
| C | -5.39029400 | 2.95260800 | 2.83840400 |
| C | -4.10767300 | 2.65331600 | 2.05821100 |
| C | -2.87797800 | 2.56634800 | 2.90451200 |
| C | -1.77397900 | 1.81532000 | 2.46831800 |
| C | -2.74566100 | 3.33587700 | 4.06623200 |
| C | -0.58556100 | 1.82710700 | 3.18458500 |
| H | -1.84598900 | 1.23342100 | 1.54799100 |
| C | -1.54060900 | 3.36716800 | 4.76537700 |
| H | -3.58862200 | 3.92285800 | 4.43109900 |
| C | -0.45914600 | 2.60756400 | 4.33486900 |
| H | 0.25496800  | 1.22831900 | 2.83956900 |
| H | -1.45909400 | 3.97781000 | 5.66191600 |
| H | 0.47581700  | 2.61899200 | 4.88993600 |
| N | -6.24431200 | 3.93358400 | 2.48406200 |

|    |             |             |             |
|----|-------------|-------------|-------------|
| S  | -7.95801500 | 3.74984200  | 2.81362000  |
| O  | -8.55423900 | 4.80613900  | 2.01377400  |
| O  | -8.26852900 | 2.35475700  | 2.56333700  |
| C  | -5.82917900 | 5.21784300  | 1.90939700  |
| H  | -6.37931100 | 6.01595000  | 2.41758600  |
| H  | -4.76520900 | 5.36604500  | 2.10524900  |
| H  | -6.03409100 | 5.26490100  | 0.83576500  |
| C  | -8.15218800 | 4.12718200  | 4.52213200  |
| C  | -8.13693700 | 5.46357100  | 4.91854900  |
| C  | -8.33141200 | 3.09187900  | 5.43874600  |
| C  | -8.29213200 | 5.75772500  | 6.26593500  |
| H  | -8.01982700 | 6.26116000  | 4.18834500  |
| C  | -8.49503100 | 3.41129400  | 6.77700700  |
| H  | -8.34986900 | 2.05915500  | 5.10207600  |
| C  | -8.47407500 | 4.74271300  | 7.21039500  |
| H  | -8.28161200 | 6.79533800  | 6.59347600  |
| H  | -8.64323200 | 2.61649200  | 7.50604400  |
| C  | -8.66778400 | 5.06548900  | 8.65709900  |
| H  | -9.70703700 | 4.88171700  | 8.95797700  |
| H  | -8.03696100 | 4.43323900  | 9.29240500  |
| H  | -8.43777400 | 6.11361000  | 8.87158500  |
| C  | -2.94176400 | 4.78408600  | -1.36764600 |
| C  | -1.77806300 | 5.29473200  | -3.23304100 |
| C  | -2.84171200 | 6.13351800  | -3.17317100 |
| H  | -0.97833500 | 5.19462600  | -3.95442000 |
| H  | -3.16680600 | 6.93160300  | -3.82624600 |
| N  | -1.86170000 | 4.47624900  | -2.11881700 |
| N  | -3.53976700 | 5.80643000  | -2.01977300 |
| Au | -3.54544600 | 3.81758400  | 0.34414500  |
| C  | -4.77055500 | -0.01559700 | 3.39678700  |

|   |             |             |             |
|---|-------------|-------------|-------------|
| C | -4.47055500 | 0.18439600  | 2.02967000  |
| C | -4.17191500 | -0.91323800 | 1.22038400  |
| C | -4.10992900 | -2.17942200 | 1.77324200  |
| C | -4.34498300 | -2.39090700 | 3.14232500  |
| C | -4.67091300 | -1.32004400 | 3.93927500  |
| C | -5.27337000 | 1.02013100  | 4.22267100  |
| H | -3.95988800 | -0.73965500 | 0.16844900  |
| H | -3.85391400 | -3.02313700 | 1.13679300  |
| H | -4.27483100 | -3.39077000 | 3.56021600  |
| H | -4.87890400 | -1.45109000 | 4.99958900  |
| H | -5.39039200 | 0.78424000  | 5.28510400  |
| O | -4.47930000 | 1.38649300  | 1.42166200  |
| N | -5.71343200 | 2.19549100  | 3.86673400  |
| C | -4.73123700 | 6.46139700  | -1.55502800 |
| C | -5.97580100 | 5.89539900  | -1.86431500 |
| C | -4.58674100 | 7.62074800  | -0.77685100 |
| C | -7.11335000 | 6.55139500  | -1.38437500 |
| C | -5.75401200 | 8.23310500  | -0.31763000 |
| C | -7.00479800 | 7.70846900  | -0.62457000 |
| H | -8.09770200 | 6.14204200  | -1.60705500 |
| H | -5.68416300 | 9.13163300  | 0.29246800  |
| H | -7.90309300 | 8.20228800  | -0.26029000 |
| C | -0.96695800 | 3.40716900  | -1.78138000 |
| C | 0.08298200  | 3.67011900  | -0.89117300 |
| C | -1.23643800 | 2.13286300  | -2.29917800 |
| C | 0.89565000  | 2.59430000  | -0.52796900 |
| C | -0.39398400 | 1.09135800  | -1.90563600 |
| C | 0.66094400  | 1.31966100  | -1.02928100 |
| H | 1.71862000  | 2.75853200  | 0.16631400  |
| H | -0.57036700 | 0.08683800  | -2.28729700 |

|   |             |             |             |
|---|-------------|-------------|-------------|
| H | 1.30508000  | 0.49449700  | -0.73270600 |
| C | -3.22432500 | 8.13957800  | -0.36526900 |
| C | -2.87487800 | 7.61493800  | 1.02997300  |
| C | -3.12590100 | 9.66039900  | -0.40234300 |
| H | -2.47700200 | 7.74375100  | -1.06790900 |
| H | -2.90074700 | 6.51466900  | 1.06986900  |
| H | -1.87273900 | 7.94708500  | 1.33026200  |
| H | -3.59282100 | 7.99638000  | 1.77031500  |
| H | -3.43511800 | 10.06532200 | -1.37314100 |
| H | -3.74461600 | 10.12992600 | 0.37283300  |
| H | -2.09087400 | 9.97241300  | -0.21888700 |
| C | -6.12480300 | 4.60356500  | -2.64228700 |
| C | -7.00014400 | 4.79142200  | -3.87881900 |
| C | -6.68311200 | 3.49919200  | -1.74271800 |
| H | -5.13055100 | 4.28213000  | -2.98655500 |
| H | -6.61579900 | 5.58818000  | -4.52717000 |
| H | -7.03450600 | 3.86473000  | -4.46442700 |
| H | -8.03225800 | 5.04636100  | -3.60654100 |
| H | -6.00771500 | 3.28735100  | -0.89882600 |
| H | -7.66057600 | 3.78243100  | -1.32862700 |
| H | -6.81931600 | 2.57107100  | -2.31179500 |
| C | -2.41493300 | 1.86073000  | -3.21012400 |
| C | -3.44210000 | 0.97390300  | -2.50870100 |
| C | -1.97099000 | 1.24833800  | -4.53517000 |
| H | -2.90825600 | 2.81659600  | -3.43639800 |
| H | -3.78193900 | 1.42686800  | -1.56466200 |
| H | -4.31852300 | 0.81915000  | -3.15039400 |
| H | -3.01707600 | -0.01286600 | -2.28007400 |
| H | -1.24485600 | 1.89017500  | -5.04916800 |
| H | -1.50680300 | 0.26470100  | -4.38790500 |

|   |             |            |             |
|---|-------------|------------|-------------|
| H | -2.83201600 | 1.11035700 | -5.20022300 |
| C | 0.33383700  | 5.04555800 | -0.30984300 |
| C | 1.69120200  | 5.58616500 | -0.75123800 |
| C | 0.21569100  | 5.02182100 | 1.21255500  |
| H | -0.43729100 | 5.73188000 | -0.68995200 |
| H | 1.76456300  | 5.63508900 | -1.84492800 |
| H | 1.85079100  | 6.59592300 | -0.35362500 |
| H | 2.50945700  | 4.95119900 | -0.38685300 |
| H | -0.76536600 | 4.63612500 | 1.52838700  |
| H | 0.98675800  | 4.38233700 | 1.66242800  |
| H | 0.34043300  | 6.03117800 | 1.62441400  |

**SMD-M06/6-31G(d,p)/SDD**

Electronic Energy (0K) = -2915.805502

Electronic Energy (0K) + ZPE = -2914.850304

Enthalpy (298K) = -2914.792273

Free Energy (298K) = -2914.941871

**SMD-M06/6-311+G(d,p)/SDD**

Electronic Energy (0K) = -2916.369665

**TS<sub>c</sub>**

Number of imaginary frequencies: 1

|   |             |            |            |
|---|-------------|------------|------------|
| C | -6.22630600 | 3.09526200 | 2.51946500 |
| C | -4.78608400 | 3.31074100 | 2.22313000 |
| C | -3.92793700 | 3.37440600 | 3.35474100 |
| C | -2.52276400 | 3.33041400 | 3.14149000 |
| C | -4.39844000 | 3.53478300 | 4.69043900 |
| C | -1.63813600 | 3.43525900 | 4.19546200 |
| H | -2.16107200 | 3.19034800 | 2.12310300 |
| C | -3.50773700 | 3.66676800 | 5.73409900 |
| H | -5.46547900 | 3.57137700 | 4.89487300 |

|   |             |            |             |
|---|-------------|------------|-------------|
| C | -2.13105600 | 3.61152000 | 5.48984600  |
| H | -0.56733500 | 3.38572800 | 4.01827300  |
| H | -3.87583200 | 3.80801000 | 6.74699600  |
| H | -1.43575100 | 3.70667600 | 6.32069800  |
| N | -7.00878000 | 4.18610700 | 2.71144200  |
| S | -8.59634400 | 4.00279300 | 3.40785400  |
| O | -9.21857800 | 5.30122400 | 3.20659100  |
| O | -9.20395000 | 2.79611800 | 2.88060600  |
| C | -6.58901700 | 5.48980200 | 2.18580100  |
| H | -7.44076800 | 6.17016000 | 2.20869900  |
| H | -5.77703300 | 5.90637300 | 2.79446100  |
| H | -6.26515900 | 5.37299900 | 1.14349200  |
| C | -8.20584500 | 3.80142900 | 5.11654900  |
| C | -7.70676600 | 4.90629000 | 5.80841500  |
| C | -8.33845600 | 2.55592900 | 5.71976500  |
| C | -7.33033200 | 4.74560800 | 7.13212500  |
| H | -7.61117600 | 5.87240900 | 5.31568700  |
| C | -7.96077000 | 2.42002700 | 7.05002600  |
| H | -8.72340400 | 1.71053000 | 5.15539500  |
| C | -7.45003900 | 3.50293700 | 7.77027300  |
| H | -6.93705200 | 5.59497300 | 7.68827300  |
| H | -8.05897100 | 1.45293700 | 7.53939000  |
| C | -7.05106700 | 3.35284700 | 9.20370200  |
| H | -6.95576700 | 2.30021500 | 9.48741000  |
| H | -6.09887800 | 3.85665100 | 9.40618100  |
| H | -7.79958400 | 3.80954100 | 9.86378800  |
| C | -3.31819200 | 4.33871100 | -1.49127900 |
| C | -1.94890800 | 4.57393100 | -3.26953400 |
| C | -2.85113400 | 5.58479500 | -3.31268600 |
| H | -1.12485100 | 4.31664700 | -3.92070500 |

|    |             |             |             |
|----|-------------|-------------|-------------|
| H  | -2.98758100 | 6.39896500  | -4.01121700 |
| N  | -2.24986000 | 3.82641600  | -2.14276800 |
| N  | -3.68522800 | 5.41763700  | -2.21768600 |
| Au | -4.11222500 | 3.67700100  | 0.31327900  |
| C  | -6.95327300 | 0.38772100  | 1.37078200  |
| C  | -7.13714500 | 1.39898100  | 0.36345600  |
| C  | -7.67841600 | 0.96407800  | -0.88402200 |
| C  | -7.91876000 | -0.36716400 | -1.12636400 |
| C  | -7.67670700 | -1.36112800 | -0.14990800 |
| C  | -7.21822800 | -0.97327500 | 1.08354300  |
| C  | -6.64422100 | 0.75365300  | 2.69903900  |
| H  | -7.86650600 | 1.71797200  | -1.64557400 |
| H  | -8.30858100 | -0.66516000 | -2.09878900 |
| H  | -7.87630100 | -2.40620000 | -0.37005800 |
| H  | -7.05858000 | -1.70486100 | 1.87612600  |
| H  | -6.64227700 | -0.04733000 | 3.44591400  |
| O  | -6.83412300 | 2.62374700  | 0.57569100  |
| N  | -6.44180800 | 1.94744100  | 3.17780700  |
| C  | -4.73628600 | 6.31281500  | -1.81960100 |
| C  | -5.99684200 | 6.16992500  | -2.41837600 |
| C  | -4.45713900 | 7.26212500  | -0.82639500 |
| C  | -7.01769400 | 7.00433900  | -1.96188000 |
| C  | -5.51368500 | 8.07634600  | -0.40903400 |
| C  | -6.77984100 | 7.94398400  | -0.96434900 |
| H  | -8.01416000 | 6.91671900  | -2.38976000 |
| H  | -5.33698900 | 8.82706600  | 0.35996100  |
| H  | -7.59015400 | 8.58441700  | -0.62260400 |
| C  | -1.47687100 | 2.73718400  | -1.61432800 |
| C  | -0.35477200 | 3.05230200  | -0.83298900 |
| C  | -1.91786200 | 1.42564600  | -1.83678800 |



|   |             |             |             |
|---|-------------|-------------|-------------|
| C | 0.32756800  | 1.98858900  | -0.23926200 |
| C | -1.20449200 | 0.39941300  | -1.21348400 |
| C | -0.09848600 | 0.67761500  | -0.41911100 |
| H | 1.20416100  | 2.19242900  | 0.37409500  |
| H | -1.52193600 | -0.63255600 | -1.35411200 |
| H | 0.44268000  | -0.13678900 | 0.05762300  |
| C | -3.07824400 | 7.44237800  | -0.22288700 |
| C | -3.09053800 | 7.21708900  | 1.28727700  |
| C | -2.51294200 | 8.81823700  | -0.56745600 |
| H | -2.40295300 | 6.69223400  | -0.65951700 |
| H | -3.44553100 | 6.20490700  | 1.53193300  |
| H | -2.08026500 | 7.33454900  | 1.69998800  |
| H | -3.74092600 | 7.93991900  | 1.79765100  |
| H | -2.48031700 | 8.97622800  | -1.65268600 |
| H | -3.11919300 | 9.62121600  | -0.12828300 |
| H | -1.49235200 | 8.91988800  | -0.17784300 |
| C | -6.25679900 | 5.11170400  | -3.47024200 |
| C | -7.22707500 | 5.56903000  | -4.55297300 |
| C | -6.76302700 | 3.83231700  | -2.80498000 |
| H | -5.30200900 | 4.87607600  | -3.96151200 |
| H | -6.91875000 | 6.51941000  | -5.00461100 |
| H | -7.27882500 | 4.81618400  | -5.34829100 |
| H | -8.24476600 | 5.69362700  | -4.16176200 |
| H | -6.06710400 | 3.46101700  | -2.03951800 |
| H | -7.72626700 | 4.01852800  | -2.30870400 |
| H | -6.90980500 | 3.03986800  | -3.55137900 |
| C | -3.12358100 | 1.10861900  | -2.69615000 |
| C | -4.29224100 | 0.60842900  | -1.84843600 |
| C | -2.78414400 | 0.10059400  | -3.79099200 |
| H | -3.44639500 | 2.03679600  | -3.19071300 |

|   |             |             |             |
|---|-------------|-------------|-------------|
| H | -4.56918200 | 1.33665300  | -1.07059800 |
| H | -5.17434800 | 0.43661700  | -2.47824200 |
| H | -4.04622700 | -0.33903600 | -1.34860000 |
| H | -1.94333200 | 0.43951600  | -4.40779600 |
| H | -2.52086700 | -0.87781300 | -3.36943000 |
| H | -3.64936800 | -0.04857900 | -4.44811500 |
| C | 0.12838000  | 4.47538300  | -0.63236900 |
| C | 1.51584800  | 4.66336500  | -1.24226500 |
| C | 0.12108700  | 4.88376300  | 0.83813300  |
| H | -0.55760700 | 5.15486300  | -1.15699100 |
| H | 1.52896700  | 4.38958900  | -2.30451500 |
| H | 1.83382700  | 5.70950500  | -1.15647300 |
| H | 2.26364500  | 4.04564900  | -0.72810300 |
| H | -0.89014000 | 4.83472500  | 1.26449600  |
| H | 0.77778000  | 4.24080000  | 1.43951700  |
| H | 0.47974400  | 5.91573400  | 0.94460800  |

**SMD-M06/6-31G(d,p)/SDD**

Electronic Energy (0K) = -2915.767869

Electronic Energy (0K) + ZPE = -2914.819177

Enthalpy (298K) = -2914.759639

Free Energy (298K) = -2914.915117

**SMD-M06/6-311+G(d,p)/SDD**

Electronic Energy (0K) = -2916.334872

**C'**

Number of imaginary frequencies: 0

|   |             |             |            |
|---|-------------|-------------|------------|
| C | -1.60147800 | -0.69162000 | 1.47400600 |
| C | -0.10515900 | -0.42317900 | 1.28868700 |
| C | 0.71179100  | -0.25914300 | 2.44082200 |
| C | 2.12259900  | -0.33896600 | 2.26726900 |

|   |             |             |            |
|---|-------------|-------------|------------|
| C | 0.21890600  | 0.00404500  | 3.75232900 |
| C | 2.98751200  | -0.17848500 | 3.33105100 |
| H | 2.51089500  | -0.56299200 | 1.27385300 |
| C | 1.09102600  | 0.19045900  | 4.80437800 |
| H | -0.84927800 | 0.08864300  | 3.91847600 |
| C | 2.47085100  | 0.09446200  | 4.59870700 |
| H | 4.06062800  | -0.25915500 | 3.18085900 |
| H | 0.70249400  | 0.41054300  | 5.79541000 |
| H | 3.14972000  | 0.23609700  | 5.43663100 |
| N | -2.26787200 | 0.50160800  | 1.95176900 |
| S | -3.82504700 | 0.30860300  | 2.62501700 |
| O | -4.50364200 | 1.58002800  | 2.39959700 |
| O | -4.43208500 | -0.93163100 | 2.15976100 |
| C | -2.02427000 | 1.72713500  | 1.17866600 |
| H | -2.55564800 | 2.55841100  | 1.64352900 |
| H | -0.95250600 | 1.95746300  | 1.21173500 |
| H | -2.34702200 | 1.63682600  | 0.13199300 |
| C | -3.47967200 | 0.16838300  | 4.35678300 |
| C | -3.02912100 | 1.30148700  | 5.03411800 |
| C | -3.61495300 | -1.05569400 | 4.99897500 |
| C | -2.70416400 | 1.19275900  | 6.37740800 |
| H | -2.92886700 | 2.25198400  | 4.51312600 |
| C | -3.28760600 | -1.14359900 | 6.34733400 |
| H | -3.96311800 | -1.92560400 | 4.44805400 |
| C | -2.82676400 | -0.02933500 | 7.05228200 |
| H | -2.35000100 | 2.06806600  | 6.91997900 |
| H | -3.38918300 | -2.09662300 | 6.86346800 |
| C | -2.48757500 | -0.12254600 | 8.50656600 |
| H | -2.38897800 | -1.16267600 | 8.83248600 |
| H | -1.55185800 | 0.40205700  | 8.73184900 |

|    |             |             |             |
|----|-------------|-------------|-------------|
| H  | -3.26955000 | 0.34485800  | 9.11872200  |
| C  | 1.45347000  | 0.64190100  | -2.37353900 |
| C  | 2.82122900  | 0.93563200  | -4.14452300 |
| C  | 1.91943900  | 1.94771500  | -4.15311700 |
| H  | 3.64563900  | 0.69944400  | -4.80339000 |
| H  | 1.78340800  | 2.78569100  | -4.82292900 |
| N  | 2.52073100  | 0.15193700  | -3.04282300 |
| N  | 1.08731800  | 1.74571900  | -3.06245500 |
| Au | 0.64646000  | -0.07215000 | -0.58967400 |
| C  | -2.03473600 | -3.32672800 | 0.65335800  |
| C  | -2.31821500 | -2.27015400 | -0.22043100 |
| C  | -2.78478500 | -2.53072100 | -1.50548100 |
| C  | -2.89948900 | -3.85064600 | -1.92466200 |
| C  | -2.57334000 | -4.91596700 | -1.07941100 |
| C  | -2.16287400 | -4.64965600 | 0.21629000  |
| C  | -1.79435000 | -2.95982400 | 2.02496200  |
| H  | -3.04844200 | -1.70327400 | -2.15794100 |
| H  | -3.25036600 | -4.05284200 | -2.93441700 |
| H  | -2.66782200 | -5.94030300 | -1.42884700 |
| H  | -1.94942100 | -5.45579300 | 0.91654400  |
| H  | -1.78776500 | -3.75263900 | 2.78008300  |
| O  | -2.19032400 | -0.98690100 | 0.18230500  |
| N  | -1.67142000 | -1.75307400 | 2.44382200  |
| C  | 0.04833500  | 2.64165900  | -2.63403400 |
| C  | -1.22258400 | 2.51705100  | -3.21435100 |
| C  | 0.35161100  | 3.58170100  | -1.63973000 |
| C  | -2.22412500 | 3.36918400  | -2.74878500 |
| C  | -0.68721000 | 4.41147400  | -1.20858000 |
| C  | -1.95992000 | 4.30448500  | -1.75349700 |
| H  | -3.22617900 | 3.29918400  | -3.16638900 |

|   |             |             |             |
|---|-------------|-------------|-------------|
| H | -0.49096900 | 5.15354700  | -0.43602200 |
| H | -2.75529600 | 4.95893400  | -1.40346700 |
| C | 3.28816700  | -0.96222600 | -2.56118600 |
| C | 4.41118300  | -0.68804600 | -1.76630100 |
| C | 2.84300400  | -2.26007100 | -2.84511600 |
| C | 5.08818900  | -1.78098600 | -1.22168500 |
| C | 3.55285000  | -3.31735000 | -2.27213200 |
| C | 4.65868700  | -3.08069300 | -1.46423300 |
| H | 5.96485600  | -1.60883000 | -0.59902600 |
| H | 3.23186500  | -4.34012700 | -2.46284300 |
| H | 5.19701200  | -3.91828800 | -1.02605100 |
| C | 1.73288200  | 3.72420500  | -1.03288800 |
| C | 1.70678900  | 3.44013900  | 0.46748000  |
| C | 2.31912700  | 5.10311100  | -1.32386500 |
| H | 2.39891100  | 2.98129300  | -1.49544800 |
| H | 1.32574400  | 2.42756800  | 0.66846600  |
| H | 2.71591300  | 3.51763400  | 0.89244600  |
| H | 1.06683100  | 4.15590200  | 1.00053100  |
| H | 2.35854500  | 5.29993100  | -2.40249800 |
| H | 1.72392800  | 5.89884700  | -0.85760900 |
| H | 3.33959300  | 5.17515100  | -0.92751400 |
| C | -1.51708000 | 1.44442000  | -4.24113800 |
| C | -2.53832200 | 1.87140700  | -5.28814100 |
| C | -1.98706500 | 0.17781400  | -3.52551900 |
| H | -0.58145200 | 1.20529000  | -4.76719400 |
| H | -2.26734400 | 2.82267000  | -5.76114500 |
| H | -2.60660000 | 1.10938200  | -6.07330700 |
| H | -3.54206400 | 1.97935400  | -4.85756600 |
| H | -1.23910400 | -0.18731700 | -2.80607000 |
| H | -2.91267200 | 0.38490100  | -2.96781500 |

|   |             |             |             |
|---|-------------|-------------|-------------|
| H | -2.19198300 | -0.62640000 | -4.24514600 |
| C | 1.63482000  | -2.53187100 | -3.71599200 |
| C | 0.47526000  | -3.08604300 | -2.89041600 |
| C | 1.97457200  | -3.47379000 | -4.86811500 |
| H | 1.30446500  | -1.57839000 | -4.15440900 |
| H | 0.20446000  | -2.40830300 | -2.06587600 |
| H | -0.41242300 | -3.22247500 | -3.52165900 |
| H | 0.72931300  | -4.06146800 | -2.45288800 |
| H | 2.80696700  | -3.09183500 | -5.47099100 |
| H | 2.25206800  | -4.47095200 | -4.50317300 |
| H | 1.10595100  | -3.59556100 | -5.52644900 |
| C | 4.90156200  | 0.72202100  | -1.50249300 |
| C | 6.30274700  | 0.92055900  | -2.07646500 |
| C | 4.86555300  | 1.07484400  | -0.01795100 |
| H | 4.23247400  | 1.42658600  | -2.01587600 |
| H | 6.33437800  | 0.68618600  | -3.14780300 |
| H | 6.62622600  | 1.96031700  | -1.94575700 |
| H | 7.03592400  | 0.27883100  | -1.57063200 |
| H | 3.84272800  | 1.03240400  | 0.38046200  |
| H | 5.49240500  | 0.39465900  | 0.57436200  |
| H | 5.24277100  | 2.09398300  | 0.13681600  |

**SMD-M06/6-31G(d,p)/SDD**

Electronic Energy (0K) = -2915.789201

Electronic Energy (0K) + ZPE = -2914.838269

Enthalpy (298K) = -2914.778984

Free Energy (298K) = -2914.933873

**SMD-M06/6-311+G(d,p)/SDD**

Electronic Energy (0K) = -2916.353726

Number of imaginary frequencies: 0

|   |             |            |             |
|---|-------------|------------|-------------|
| C | -5.49551900 | 1.05110300 | -2.84630300 |
| C | -4.16983600 | 1.28362500 | -3.01155900 |
| C | -3.52444100 | 2.42479300 | -3.67112000 |
| C | -4.05606200 | 3.03225800 | -4.81810200 |
| C | -2.31123100 | 2.90254200 | -3.15552700 |
| C | -3.39908300 | 4.09874900 | -5.41768000 |
| H | -4.98369500 | 2.65921600 | -5.24514000 |
| C | -1.66568300 | 3.98056800 | -3.74939000 |
| H | -1.88140700 | 2.42620100 | -2.27786700 |
| C | -2.20809800 | 4.58395700 | -4.88086300 |
| H | -3.82196900 | 4.55507800 | -6.31022700 |
| H | -0.73251100 | 4.34817600 | -3.32854500 |
| H | -1.69947600 | 5.42280500 | -5.35082000 |
| N | -6.41894200 | 2.05144300 | -3.26395300 |
| S | -6.95320000 | 3.09138200 | -2.03444300 |
| O | -5.86355300 | 3.19201900 | -1.07105600 |
| O | -8.28812600 | 2.69847300 | -1.58574600 |
| C | -7.48302300 | 1.60871000 | -4.16551800 |
| H | -7.01351200 | 1.10897700 | -5.01881400 |
| H | -8.03121100 | 2.47906300 | -4.54339500 |
| H | -8.18599500 | 0.91936500 | -3.68153500 |
| C | -7.09669300 | 4.62812000 | -2.90443400 |
| C | -5.93338200 | 5.33879300 | -3.20098000 |
| C | -8.34877700 | 5.10363700 | -3.27637100 |
| C | -6.03749300 | 6.53870200 | -3.88564500 |
| H | -4.96135900 | 4.95348300 | -2.89733800 |
| C | -8.43308300 | 6.31022400 | -3.96381500 |
| H | -9.24270800 | 4.53803200 | -3.02498400 |
| C | -7.28589600 | 7.04076900 | -4.27838800 |

|   |             |             |             |
|---|-------------|-------------|-------------|
| H | -5.13628200 | 7.10247100  | -4.12501900 |
| H | -9.40742700 | 6.69343900  | -4.26203300 |
| C | -7.37421800 | 8.34104800  | -5.01326900 |
| H | -6.75245700 | 8.32832500  | -5.91670100 |
| H | -7.01119400 | 9.16859200  | -4.39106000 |
| H | -8.40327100 | 8.56767700  | -5.30923000 |
| C | -4.34759100 | -1.67009200 | -2.91750300 |
| C | -3.24747500 | -0.81359900 | -3.05445600 |
| C | -2.10438600 | -1.19850000 | -3.73705300 |
| C | -2.03952700 | -2.48254400 | -4.27111300 |
| C | -3.10691600 | -3.36756800 | -4.11800800 |
| C | -4.24874500 | -2.96601900 | -3.43854400 |
| C | -5.56993000 | -1.22909900 | -2.25579100 |
| H | -1.27503000 | -0.49939400 | -3.81690200 |
| H | -1.14193800 | -2.79957800 | -4.79671100 |
| H | -3.04176500 | -4.37333600 | -4.52497100 |
| H | -5.08807500 | -3.64846900 | -3.31375900 |
| H | -6.16239500 | -2.02121600 | -1.78440500 |
| O | -3.28192700 | 0.40550800  | -2.40824100 |
| N | -6.07309200 | -0.04463000 | -2.22033800 |

**SMD-M06/6-31G(d,p)/SDD**

Electronic Energy (0K) = -1620.912834

Electronic Energy (0K) + ZPE = -1620.530760

Enthalpy (298K) = -1620.504930

Free Energy (298K) = -1620.586798

**SMD-M06/6-311+G(d,p)/SDD**

Electronic Energy (0K) = -1621.230465

**TS<sub>A1'</sub>**

Number of imaginary frequencies: 1



|    |             |             |            |
|----|-------------|-------------|------------|
| C  | -3.51706600 | 2.55759800  | 2.82612900 |
| C  | -3.06734900 | 3.77069900  | 2.97033600 |
| C  | -1.70589700 | 4.25071300  | 3.21151600 |
| C  | -0.74173200 | 4.09988000  | 2.20601500 |
| C  | -1.37542700 | 4.94584600  | 4.38043500 |
| C  | 0.53924900  | 4.61414000  | 2.38239700 |
| H  | -1.01327900 | 3.57914500  | 1.28674500 |
| C  | -0.08825200 | 5.44047800  | 4.55783000 |
| H  | -2.13510700 | 5.09135600  | 5.14767500 |
| C  | 0.87175200  | 5.27829900  | 3.56081400 |
| H  | 1.28017400  | 4.49459900  | 1.59487200 |
| H  | 0.16229800  | 5.96800500  | 5.47587100 |
| H  | 1.87383700  | 5.67788100  | 3.69756500 |
| N  | -4.55576900 | 1.82953700  | 2.45552400 |
| S  | -4.75634800 | 1.47681500  | 0.76804200 |
| O  | -6.19335400 | 1.35290700  | 0.58116100 |
| O  | -3.97126800 | 2.46700700  | 0.05022000 |
| C  | -5.57253200 | 1.32901700  | 3.38880000 |
| H  | -5.20107600 | 1.49300000  | 4.40279900 |
| H  | -6.50899500 | 1.88091900  | 3.24712000 |
| Au | -4.55764000 | 5.22363600  | 2.74109300 |
| H  | -5.74053700 | 0.25681000  | 3.24227700 |
| C  | -3.99205100 | -0.10419700 | 0.60188400 |
| C  | -4.74185600 | -1.25398900 | 0.84250500 |
| C  | -2.62338200 | -0.16279200 | 0.34455900 |
| C  | -4.09822400 | -2.48360000 | 0.82181500 |
| H  | -5.81009200 | -1.18635800 | 1.03460900 |
| C  | -2.00056300 | -1.40273500 | 0.33309600 |
| H  | -2.05720000 | 0.74863200  | 0.16341100 |
| C  | -2.72402300 | -2.57599000 | 0.57462900 |

|   |             |             |             |
|---|-------------|-------------|-------------|
| H | -4.66819800 | -3.39237400 | 1.00790300  |
| H | -0.93010300 | -1.46616900 | 0.14225100  |
| C | -2.04160000 | -3.90674300 | 0.56458300  |
| H | -2.50585900 | -4.59888300 | 1.27596100  |
| H | -2.10812900 | -4.37028600 | -0.42835400 |
| H | -0.97848000 | -3.81259000 | 0.81131000  |
| C | -5.88066400 | 6.78494000  | 2.57403400  |
| C | -6.63579500 | 8.90500400  | 2.44285600  |
| C | -7.70904400 | 8.08098800  | 2.34714300  |
| H | -6.55365100 | 9.98300900  | 2.42709900  |
| H | -8.76404900 | 8.28548700  | 2.22688000  |
| N | -7.22229000 | 6.78443100  | 2.42590400  |
| N | -5.52547800 | 8.08922500  | 2.58679400  |
| C | -4.15750100 | 8.50814400  | 2.73255800  |
| C | -3.67782500 | 8.77545500  | 4.02334900  |
| C | -3.34359500 | 8.53494600  | 1.59152700  |
| C | -2.32219900 | 9.08225900  | 4.15172800  |
| C | -1.99572600 | 8.85175800  | 1.77445900  |
| C | -1.48927800 | 9.11948700  | 3.03979600  |
| H | -1.91022500 | 9.28331800  | 5.13926200  |
| H | -1.33352500 | 8.88146300  | 0.91064700  |
| H | -0.43442500 | 9.35654800  | 3.16152100  |
| C | -8.00952600 | 5.58310300  | 2.36884200  |
| C | -8.42534200 | 4.99877300  | 3.57290600  |
| C | -8.28390600 | 5.02658800  | 1.11082700  |
| C | -9.15448000 | 3.81011400  | 3.48916000  |
| C | -9.00654400 | 3.83293100  | 1.08283300  |
| C | -9.44024500 | 3.23209200  | 2.25866700  |
| H | -9.49576000 | 3.32838100  | 4.40423400  |
| H | -9.22599000 | 3.36304600  | 0.12586900  |

|   |              |             |             |
|---|--------------|-------------|-------------|
| H | -10.00480500 | 2.30317100  | 2.21498500  |
| C | -8.08034900  | 5.57979600  | 4.92821700  |
| C | -9.32998100  | 5.84001200  | 5.76442300  |
| C | -7.10843200  | 4.66233800  | 5.66991200  |
| H | -7.57683200  | 6.54568500  | 4.77587200  |
| H | -10.03289700 | 6.49992200  | 5.24167800  |
| H | -9.06034700  | 6.31552600  | 6.71522800  |
| H | -9.85641000  | 4.90636400  | 6.00056700  |
| H | -6.18782400  | 4.50082500  | 5.08841900  |
| H | -7.56219400  | 3.68038500  | 5.86133200  |
| H | -6.83128300  | 5.09578900  | 6.63917200  |
| C | -7.76346900  | 5.63971800  | -0.17200400 |
| C | -6.53485500  | 4.86665300  | -0.65226900 |
| C | -8.82416400  | 5.70223000  | -1.26612800 |
| H | -7.44954900  | 6.67161600  | 0.04129000  |
| H | -5.74660500  | 4.84293100  | 0.11484200  |
| H | -6.11996600  | 5.32273000  | -1.56056400 |
| H | -6.80044500  | 3.82647600  | -0.88450300 |
| H | -9.72875200  | 6.22080700  | -0.92666300 |
| H | -9.11644500  | 4.70101100  | -1.60735200 |
| H | -8.43232000  | 6.23914600  | -2.13831600 |
| C | -4.55765000  | 8.66834300  | 5.25137800  |
| C | -4.24259500  | 7.38263200  | 6.01701600  |
| C | -4.43114400  | 9.88342100  | 6.16499700  |
| H | -5.60485600  | 8.61187900  | 4.92209400  |
| H | -4.36879200  | 6.49352200  | 5.38059100  |
| H | -4.90345600  | 7.28078800  | 6.88736800  |
| H | -3.20566500  | 7.39291800  | 6.38101100  |
| H | -4.62745000  | 10.81776300 | 5.62580900  |
| H | -3.43065500  | 9.95444600  | 6.61029500  |

|   |             |             |             |
|---|-------------|-------------|-------------|
| H | -5.14945600 | 9.81076400  | 6.99048400  |
| C | -3.85982300 | 8.21046800  | 0.20532900  |
| C | -3.70639400 | 9.40577900  | -0.73184500 |
| C | -3.16272400 | 6.97468200  | -0.36243400 |
| H | -4.93346900 | 7.98396000  | 0.27727200  |
| H | -4.22438000 | 10.29006200 | -0.34028400 |
| H | -4.12648700 | 9.17501700  | -1.71841900 |
| H | -2.65054000 | 9.67005500  | -0.87466100 |
| H | -3.28875700 | 6.10309900  | 0.29878200  |
| H | -2.08579600 | 7.14883300  | -0.48726000 |
| H | -3.57378300 | 6.72015600  | -1.34734400 |
| C | -0.61804600 | -0.39970700 | 3.55357100  |
| C | -1.89488600 | -0.93974500 | 3.71475100  |
| C | -2.13680300 | -2.27897400 | 3.99933300  |
| C | -1.00826300 | -3.07540000 | 4.10130200  |
| C | 0.29469000  | -2.56114000 | 3.93059100  |
| C | 0.51190100  | -1.22465500 | 3.65840700  |
| C | -0.87241300 | 0.96856600  | 3.26446800  |
| H | -3.14375800 | -2.66776500 | 4.11751600  |
| H | -1.12979000 | -4.13464000 | 4.31538400  |
| H | 1.14120200  | -3.23666700 | 4.01947600  |
| H | 1.51363500  | -0.82490400 | 3.53011100  |
| H | -0.17885600 | 1.77552900  | 3.05590000  |
| O | -2.82748500 | 0.02335300  | 3.54188300  |
| N | -2.15969000 | 1.19806300  | 3.25270200  |

**SMD-M06/6-31G(d,p)/SDD**

Electronic Energy (0K) = -2915.746890

Electronic Energy (0K) + ZPE = -2914.796346

Enthalpy (298K) = -2914.737353

Free Energy (298K) = -2914.890872

**SMD-M06/6-311+G(d,p)/SDD**

Electronic Energy (0K) = -2916.316174

**A1'**

Number of imaginary frequencies: 0

|    |             |             |             |
|----|-------------|-------------|-------------|
| C  | -3.56490600 | 2.27608600  | 2.75338600  |
| C  | -3.29223800 | 3.52787200  | 3.17374200  |
| C  | -2.07095400 | 3.84046100  | 3.93898900  |
| C  | -1.67331000 | 3.06893300  | 5.04285700  |
| C  | -1.30946500 | 4.97405100  | 3.61246000  |
| C  | -0.55044000 | 3.41647400  | 5.78612900  |
| H  | -2.26566700 | 2.20238700  | 5.33584300  |
| C  | -0.17442600 | 5.30540600  | 4.34267600  |
| H  | -1.62175100 | 5.59483100  | 2.77134100  |
| C  | 0.20745700  | 4.53088000  | 5.43631700  |
| H  | -0.26859000 | 2.81338800  | 6.64666400  |
| H  | 0.40429300  | 6.18440700  | 4.06582700  |
| H  | 1.08492800  | 4.80120200  | 6.01921100  |
| N  | -4.77217700 | 1.77502700  | 2.23076600  |
| S  | -4.80895200 | 1.41297800  | 0.57616300  |
| O  | -6.22042300 | 1.34078300  | 0.21451400  |
| O  | -3.90311100 | 2.31537600  | -0.12948600 |
| C  | -6.05020900 | 2.07829700  | 2.88466700  |
| H  | -5.85812500 | 2.13688000  | 3.95953200  |
| H  | -6.48082300 | 3.02882300  | 2.54224400  |
| Au | -4.58655200 | 5.11324700  | 2.79803800  |
| H  | -6.76456000 | 1.27161600  | 2.69710800  |
| C  | -4.11355500 | -0.21810900 | 0.50367600  |
| C  | -4.76423300 | -1.25231400 | 1.17676400  |
| C  | -2.93183300 | -0.43968300 | -0.19465400 |

|   |             |             |             |
|---|-------------|-------------|-------------|
| C | -4.20508600 | -2.52011900 | 1.15752700  |
| H | -5.68728900 | -1.06186300 | 1.72166400  |
| C | -2.38683000 | -1.71960500 | -0.20401400 |
| H | -2.44116000 | 0.38270000  | -0.71023400 |
| C | -3.00820300 | -2.77166600 | 0.47228700  |
| H | -4.69560500 | -3.33440300 | 1.68860200  |
| H | -1.45468700 | -1.90322800 | -0.73639000 |
| C | -2.41753400 | -4.14634800 | 0.46145200  |
| H | -2.60901900 | -4.67055100 | 1.40463400  |
| H | -2.86013700 | -4.75352400 | -0.33899800 |
| H | -1.33593800 | -4.11893900 | 0.28988700  |
| C | -5.80185500 | 6.75743300  | 2.48733100  |
| C | -6.48866100 | 8.89611700  | 2.25675000  |
| C | -7.58999100 | 8.10704200  | 2.20829200  |
| H | -6.36721600 | 9.96808700  | 2.18319900  |
| H | -8.63853900 | 8.34149800  | 2.08637400  |
| N | -7.14607800 | 6.80078700  | 2.34725900  |
| N | -5.40561200 | 8.04900000  | 2.43189900  |
| C | -4.03035400 | 8.45475600  | 2.52148000  |
| C | -3.49524600 | 8.73568300  | 3.78716300  |
| C | -3.27481200 | 8.50459000  | 1.34162800  |
| C | -2.14544700 | 9.08809200  | 3.84705500  |
| C | -1.93155700 | 8.86995200  | 1.45549700  |
| C | -1.37280000 | 9.15948300  | 2.69404900  |
| H | -1.69153500 | 9.30301400  | 4.81303600  |
| H | -1.31420300 | 8.91770100  | 0.55972700  |
| H | -0.32359600 | 9.43937600  | 2.76256400  |
| C | -7.97926600 | 5.62971500  | 2.37422700  |
| C | -8.41372900 | 5.14999600  | 3.61766600  |
| C | -8.28178700 | 4.99766700  | 1.15848300  |

|   |              |            |             |
|---|--------------|------------|-------------|
| C | -9.17838100  | 3.98076500 | 3.62072700  |
| C | -9.04110100  | 3.82772200 | 1.21792300  |
| C | -9.48707700  | 3.32600500 | 2.43515600  |
| H | -9.52975400  | 3.57612200 | 4.56867200  |
| H | -9.28019300  | 3.29780700 | 0.29766000  |
| H | -10.07875200 | 2.41325300 | 2.45883100  |
| C | -8.05058300  | 5.82220300 | 4.92586800  |
| C | -9.28754700  | 6.14443400 | 5.75957800  |
| C | -7.06914300  | 4.95894200 | 5.71833000  |
| H | -7.54756900  | 6.77397600 | 4.70082200  |
| H | -10.00216200 | 6.75895900 | 5.19886000  |
| H | -9.00243200  | 6.69522000 | 6.66411700  |
| H | -9.80689800  | 5.23248600 | 6.08100700  |
| H | -6.14808000  | 4.77182400 | 5.14516000  |
| H | -7.51521200  | 3.98714600 | 5.97066000  |
| H | -6.79307200  | 5.45411700 | 6.65801700  |
| C | -7.75901500  | 5.51267000 | -0.16658500 |
| C | -6.52930400  | 4.71044500 | -0.59395900 |
| C | -8.81814700  | 5.49198000 | -1.26409900 |
| H | -7.44882000  | 6.55861000 | -0.02869300 |
| H | -5.73079300  | 4.75497800 | 0.16167300  |
| H | -6.12777500  | 5.09558900 | -1.54037400 |
| H | -6.78396400  | 3.65188600 | -0.73830700 |
| H | -9.73119000  | 6.01786700 | -0.96028500 |
| H | -9.09430300  | 4.46740900 | -1.54383800 |
| H | -8.43057000  | 5.97874300 | -2.16705000 |
| C | -4.30910100  | 8.60952000 | 5.05820600  |
| C | -3.90437200  | 7.34816100 | 5.82264100  |
| C | -4.18704600  | 9.84277200 | 5.94809400  |
| H | -5.36819600  | 8.50568900 | 4.78060700  |

|   |             |             |             |
|---|-------------|-------------|-------------|
| H | -4.05439700 | 6.44486900  | 5.21190000  |
| H | -4.49788500 | 7.24623000  | 6.74032200  |
| H | -2.84402400 | 7.38638700  | 6.10853600  |
| H | -4.44423600 | 10.76069200 | 5.40607400  |
| H | -3.17001300 | 9.95792700  | 6.34406000  |
| H | -4.86237900 | 9.75577600  | 6.80773100  |
| C | -3.84508600 | 8.13003800  | -0.01034900 |
| C | -3.67898300 | 9.25617200  | -1.02642900 |
| C | -3.20596700 | 6.83628200  | -0.51484400 |
| H | -4.92304100 | 7.94536100  | 0.10403400  |
| H | -4.13736400 | 10.18737900 | -0.67157900 |
| H | -4.15407600 | 8.98443200  | -1.97683100 |
| H | -2.62050200 | 9.45906400  | -1.23409100 |
| H | -3.35918300 | 6.00937100  | 0.19540700  |
| H | -2.12420800 | 6.96150300  | -0.65761200 |
| H | -3.63767100 | 6.54248800  | -1.47981200 |
| C | -0.77853700 | -0.05705000 | 2.56428900  |
| C | -1.77659800 | -0.72364600 | 3.28992600  |
| C | -1.65891600 | -2.03104200 | 3.73958000  |
| C | -0.46192000 | -2.65433100 | 3.42675800  |
| C | 0.56179600  | -2.01200100 | 2.69559300  |
| C | 0.42385800  | -0.71403200 | 2.25257900  |
| C | -1.34783300 | 1.19330000  | 2.25684400  |
| H | -2.45343900 | -2.52388000 | 4.29048800  |
| H | -0.30710900 | -3.68051800 | 3.75057900  |
| H | 1.47435800  | -2.56018900 | 2.47965800  |
| H | 1.20339400  | -0.21452600 | 1.68583000  |
| H | -0.97548200 | 2.03178000  | 1.67735400  |
| O | -2.85792900 | 0.07447200  | 3.45005600  |
| N | -2.55234600 | 1.24933900  | 2.78590900  |



**SMD-M06/6-31G(d,p)/SDD**

Electronic Energy (0K) = -2915.773465

Electronic Energy (0K) + ZPE = -2914.820015

Enthalpy (298K) = -2914.761592

Free Energy (298K) = -2914.911944

**SMD-M06/6-311+G(d,p)/SDD**

Electronic Energy (0K) = -2916.34114

**TS<sub>B1</sub>'**

Number of imaginary frequencies: 1

|   |             |            |             |
|---|-------------|------------|-------------|
| C | -3.15205900 | 2.54813100 | 2.59309700  |
| C | -2.99578500 | 3.86823800 | 3.05489900  |
| C | -1.71359900 | 4.35026000 | 3.54170900  |
| C | -1.71227900 | 5.25802200 | 4.62290200  |
| C | -0.47833000 | 4.02746800 | 2.94359800  |
| C | -0.52589500 | 5.76149700 | 5.13115000  |
| H | -2.66520200 | 5.53241700 | 5.07363500  |
| C | 0.70132200  | 4.57879700 | 3.42151800  |
| H | -0.45239000 | 3.39622400 | 2.06034400  |
| C | 0.68512000  | 5.42934800 | 4.52541500  |
| H | -0.54698200 | 6.43523400 | 5.98479300  |
| H | 1.64165000  | 4.34526600 | 2.92818200  |
| H | 1.61525600  | 5.84797600 | 4.90219900  |
| N | -4.42478900 | 2.06160900 | 2.18987700  |
| S | -4.57592200 | 1.33884400 | 0.69164600  |
| O | -6.00268100 | 1.29758700 | 0.39712500  |
| O | -3.64822800 | 2.02042100 | -0.20638400 |
| C | -5.57323100 | 2.11050800 | 3.10447400  |
| H | -5.21452600 | 1.95847500 | 4.12869000  |
| H | -6.09922900 | 3.07187000 | 3.03547500  |

|    |             |             |             |
|----|-------------|-------------|-------------|
| Au | -4.49078100 | 5.27610300  | 2.89795500  |
| H  | -6.28006000 | 1.31463000  | 2.85770000  |
| C  | -3.98053800 | -0.32403600 | 0.90267000  |
| C  | -4.32433900 | -1.04941300 | 2.04295500  |
| C  | -3.17600400 | -0.87920100 | -0.09021000 |
| C  | -3.82079700 | -2.33243700 | 2.19862700  |
| H  | -4.94587000 | -0.61316000 | 2.82237100  |
| C  | -2.69226300 | -2.17025200 | 0.07890900  |
| H  | -2.91430000 | -0.29703200 | -0.97045800 |
| C  | -2.99725700 | -2.91016000 | 1.22468900  |
| H  | -4.05849600 | -2.89736600 | 3.09871500  |
| H  | -2.05029000 | -2.60829700 | -0.68374100 |
| C  | -2.45790000 | -4.29272000 | 1.41046000  |
| H  | -2.27112600 | -4.50819200 | 2.46847800  |
| H  | -3.17358800 | -5.04222200 | 1.04816500  |
| H  | -1.52462000 | -4.43647500 | 0.85538600  |
| C  | -5.85475800 | 6.81380400  | 2.66466800  |
| C  | -6.67591800 | 8.89941700  | 2.41229200  |
| C  | -7.70461700 | 8.03112900  | 2.24351500  |
| H  | -6.63285500 | 9.97936800  | 2.37713600  |
| H  | -8.75202000 | 8.19033400  | 2.02732600  |
| N  | -7.17774200 | 6.75943100  | 2.39963200  |
| N  | -5.55421700 | 8.13252400  | 2.67654700  |
| C  | -4.22399300 | 8.62567400  | 2.90697900  |
| C  | -3.86884800 | 8.99924600  | 4.21166900  |
| C  | -3.32672000 | 8.64764500  | 1.83035300  |
| C  | -2.55164400 | 9.40973900  | 4.42277600  |
| C  | -2.02102400 | 9.06703900  | 2.09550700  |
| C  | -1.63690200 | 9.44218100  | 3.37642100  |
| H  | -2.23329100 | 9.69720600  | 5.42333100  |

|   |              |            |             |
|---|--------------|------------|-------------|
| H | -1.29668000  | 9.09836500 | 1.28311300  |
| H | -0.61398400  | 9.76258400 | 3.56231000  |
| C | -7.91725600  | 5.53191200 | 2.29193400  |
| C | -8.44607700  | 4.96747600 | 3.46103200  |
| C | -8.04585500  | 4.94229900 | 1.02584400  |
| C | -9.14125900  | 3.76316700 | 3.33001500  |
| C | -8.75151800  | 3.74033700 | 0.95008800  |
| C | -9.29622400  | 3.15882300 | 2.08861200  |
| H | -9.56264300  | 3.29052500 | 4.21571200  |
| H | -8.86570200  | 3.24649500 | -0.01320600 |
| H | -9.84173600  | 2.22103700 | 2.00787200  |
| C | -8.23594900  | 5.58149100 | 4.83009200  |
| C | -9.54390700  | 5.73221000 | 5.60093600  |
| C | -7.22926000  | 4.75247400 | 5.62899700  |
| H | -7.81059600  | 6.58799200 | 4.69958600  |
| H | -10.28424100 | 6.30715200 | 5.03202800  |
| H | -9.36562300  | 6.25257400 | 6.54965900  |
| H | -9.98646500  | 4.75730200 | 5.84178700  |
| H | -6.25894100  | 4.69221400 | 5.11288500  |
| H | -7.59622400  | 3.72704500 | 5.77547400  |
| H | -7.06459000  | 5.19382300 | 6.62012800  |
| C | -7.38813700  | 5.52613700 | -0.20710200 |
| C | -6.12526500  | 4.73207900 | -0.54478800 |
| C | -8.32973300  | 5.57534400 | -1.40591500 |
| H | -7.08519000  | 6.55921200 | 0.01721100  |
| H | -5.41606900  | 4.72616600 | 0.29826200  |
| H | -5.61780200  | 5.16400700 | -1.41719800 |
| H | -6.37341100  | 3.68758900 | -0.77591700 |
| H | -9.25851100  | 6.10917400 | -1.17166400 |
| H | -8.59595100  | 4.56921300 | -1.75362000 |

|   |             |             |             |
|---|-------------|-------------|-------------|
| H | -7.84447000 | 6.08959100  | -2.24412900 |
| C | -4.83907900 | 8.89026100  | 5.36992800  |
| C | -4.56898400 | 7.60730500  | 6.15738900  |
| C | -4.79815200 | 10.10386100 | 6.29236200  |
| H | -5.85759400 | 8.82033700  | 4.96163600  |
| H | -4.64732200 | 6.71753900  | 5.51516900  |
| H | -5.28546900 | 7.50086300  | 6.98198900  |
| H | -3.55758900 | 7.62409800  | 6.58861000  |
| H | -4.93997100 | 11.04008300 | 5.73972800  |
| H | -3.84631900 | 10.17181300 | 6.83419100  |
| H | -5.59279400 | 10.02980000 | 7.04431800  |
| C | -3.71749100 | 8.23545600  | 0.42611600  |
| C | -3.61243700 | 9.41618800  | -0.53605900 |
| C | -2.87830400 | 7.05476500  | -0.05886100 |
| H | -4.76855600 | 7.91205700  | 0.43693400  |
| H | -4.23356600 | 10.25781900 | -0.20467600 |
| H | -3.94401600 | 9.12334500  | -1.53975700 |
| H | -2.57769900 | 9.77334300  | -0.61894300 |
| H | -2.97819400 | 6.18921600  | 0.61403400  |
| H | -1.81367100 | 7.31719100  | -0.11472700 |
| H | -3.19658600 | 6.74545400  | -1.06235600 |
| C | -0.91671800 | -0.28664800 | 2.70938000  |
| C | -1.47443700 | -0.31091500 | 4.02504700  |
| C | -1.11940900 | -1.37430700 | 4.88875600  |
| C | -0.26902800 | -2.34604900 | 4.40918700  |
| C | 0.27164500  | -2.32081200 | 3.09975800  |
| C | -0.04921400 | -1.29640900 | 2.24452700  |
| C | -1.41615300 | 0.83021100  | 2.03771100  |
| H | -1.52685500 | -1.40975000 | 5.89461000  |
| H | -0.00092700 | -3.17132100 | 5.06599800  |

|   |             |             |            |
|---|-------------|-------------|------------|
| H | 0.93723000  | -3.11774400 | 2.78088300 |
| H | 0.34484400  | -1.24920700 | 1.23174800 |
| H | -1.19203200 | 1.08807600  | 0.99981700 |
| O | -2.27051500 | 0.65661100  | 4.31344000 |
| N | -2.17206000 | 1.65615400  | 2.70914200 |

**SMD-M06/6-31G(d,p)/SDD**

Electronic Energy (0K) = -2915.742453

Electronic Energy (0K) + ZPE = -2914.792613

Enthalpy (298K) = -2914.733728

Free Energy (298K) = -2914.886585

**SMD-M06/6-311+G(d,p)/SDD**

Electronic Energy (0K) = -2916.311516

**BI'**

Number of imaginary frequencies: 0

|   |             |             |             |
|---|-------------|-------------|-------------|
| C | 0.36059700  | -1.94871300 | 0.59716100  |
| C | 0.77439200  | -0.67557300 | 1.20253000  |
| C | 1.96233600  | -0.59472400 | 1.95064500  |
| C | 2.71445200  | -1.75507400 | 2.29295100  |
| C | 2.42761000  | 0.68156300  | 2.38088400  |
| C | 3.86854700  | -1.63301900 | 3.03746600  |
| H | 2.40166500  | -2.73250800 | 1.92666500  |
| C | 3.58183700  | 0.78944100  | 3.12494600  |
| H | 1.85142200  | 1.56603500  | 2.10712300  |
| C | 4.29696200  | -0.36792900 | 3.45343400  |
| H | 4.44857000  | -2.51484900 | 3.29413900  |
| H | 3.93747100  | 1.76223500  | 3.45243900  |
| H | 5.20954200  | -0.28134300 | 4.03885000  |
| N | -0.77669500 | -2.57113000 | 1.04369900  |
| S | -1.67715900 | -3.54293300 | -0.06447900 |

|    |             |             |             |
|----|-------------|-------------|-------------|
| O  | -2.85863200 | -3.91304700 | 0.70123300  |
| O  | -1.81380500 | -2.81060800 | -1.31433600 |
| C  | -1.46046400 | -2.12306900 | 2.25881700  |
| H  | -0.72438800 | -1.63997300 | 2.90898400  |
| H  | -2.26998200 | -1.41688200 | 2.03679100  |
| Au | -0.35854400 | 0.90346200  | 0.56466900  |
| H  | -1.86521900 | -2.98703300 | 2.79013700  |
| C  | -0.66177000 | -4.96307600 | -0.31282800 |
| C  | -0.42979600 | -5.81071200 | 0.76827000  |
| C  | -0.14558300 | -5.22650400 | -1.57751800 |
| C  | 0.34698900  | -6.94168400 | 0.56948300  |
| H  | -0.85089300 | -5.59110400 | 1.74772400  |
| C  | 0.61964500  | -6.37057800 | -1.75631500 |
| H  | -0.33882600 | -4.54321200 | -2.40032900 |
| C  | 0.88323600  | -7.23619400 | -0.69005100 |
| H  | 0.54219500  | -7.61466800 | 1.40244100  |
| H  | 1.02802000  | -6.59581200 | -2.73986500 |
| C  | 1.75091000  | -8.43880900 | -0.88280700 |
| H  | 2.79785000  | -8.19361900 | -0.66045700 |
| H  | 1.46049800  | -9.25631200 | -0.21453500 |
| H  | 1.71353500  | -8.80040100 | -1.91559300 |
| C  | -1.37987500 | 2.54455800  | -0.16851100 |
| C  | -1.83094600 | 4.64540400  | -0.84271100 |
| C  | -2.92174300 | 3.88437000  | -1.11464900 |
| H  | -1.62849300 | 5.69550300  | -1.00303500 |
| H  | -3.87525500 | 4.12867900  | -1.56238500 |
| N  | -2.61976300 | 2.59886000  | -0.69893500 |
| N  | -0.90012300 | 3.80436800  | -0.25726400 |
| C  | 0.41742900  | 4.17583200  | 0.18286400  |
| C  | 0.57082700  | 4.66491600  | 1.48894500  |

|   |             |             |             |
|---|-------------|-------------|-------------|
| C | 1.49363800  | 3.98032300  | -0.69400200 |
| C | 1.86620100  | 4.97257300  | 1.90898400  |
| C | 2.76805200  | 4.31097800  | -0.22707300 |
| C | 2.95287700  | 4.80280400  | 1.05855200  |
| H | 2.02658800  | 5.34607600  | 2.91866500  |
| H | 3.62738000  | 4.17546600  | -0.88181900 |
| H | 3.95383200  | 5.05330500  | 1.40336100  |
| C | -3.48368100 | 1.45182100  | -0.77700800 |
| C | -4.25187900 | 1.12337400  | 0.34768500  |
| C | -3.46611500 | 0.68357400  | -1.95083700 |
| C | -5.02354000 | -0.03908900 | 0.27549700  |
| C | -4.25647600 | -0.46593400 | -1.97074100 |
| C | -5.02281600 | -0.82655800 | -0.86845100 |
| H | -5.63066700 | -0.32934800 | 1.13159000  |
| H | -4.25663200 | -1.10091900 | -2.85439900 |
| H | -5.62305800 | -1.73314000 | -0.90144700 |
| C | -4.25742300 | 1.95924400  | 1.61105300  |
| C | -5.66446200 | 2.44861100  | 1.94403300  |
| C | -3.65675500 | 1.18424300  | 2.78227200  |
| H | -3.63059500 | 2.84766000  | 1.44566600  |
| H | -6.09964600 | 3.01336000  | 1.11057500  |
| H | -5.64318200 | 3.10298500  | 2.82394200  |
| H | -6.33680400 | 1.61133000  | 2.17093500  |
| H | -2.61973900 | 0.88072700  | 2.57208600  |
| H | -4.23714300 | 0.27685700  | 2.99704900  |
| H | -3.65580900 | 1.79949500  | 3.69082300  |
| C | -2.57630500 | 1.03246800  | -3.12635900 |
| C | -1.29759100 | 0.19297800  | -3.08467100 |
| C | -3.27850900 | 0.86598900  | -4.46998200 |
| H | -2.28698600 | 2.08949200  | -3.03616100 |

|   |             |             |             |
|---|-------------|-------------|-------------|
| H | -0.74762200 | 0.34758300  | -2.14320200 |
| H | -0.63602300 | 0.45512900  | -3.92077500 |
| H | -1.53517500 | -0.87675500 | -3.15631800 |
| H | -4.22696100 | 1.41489800  | -4.50482100 |
| H | -3.48817500 | -0.18784600 | -4.69238700 |
| H | -2.63784000 | 1.24378100  | -5.27575600 |
| C | -0.59642700 | 4.77761600  | 2.44677700  |
| C | -0.60021700 | 3.58005500  | 3.39874900  |
| C | -0.59675900 | 6.08607300  | 3.22999400  |
| H | -1.52657800 | 4.74401500  | 1.86197500  |
| H | -0.63926600 | 2.62714500  | 2.84845600  |
| H | -1.46395500 | 3.62398200  | 4.07419100  |
| H | 0.30964600  | 3.57487100  | 4.01546100  |
| H | -0.54812100 | 6.95666000  | 2.56545400  |
| H | 0.24838600  | 6.14473300  | 3.92742000  |
| H | -1.51350400 | 6.16486700  | 3.82630400  |
| C | 1.32622900  | 3.39901000  | -2.08221800 |
| C | 1.79490400  | 4.37566800  | -3.15685100 |
| C | 2.05837900  | 2.06140700  | -2.19278200 |
| H | 0.25723000  | 3.20629400  | -2.25390500 |
| H | 1.25335600  | 5.32761500  | -3.09437300 |
| H | 1.62792900  | 3.95433000  | -4.15555000 |
| H | 2.86706600  | 4.59082300  | -3.06283700 |
| H | 1.71812600  | 1.35990500  | -1.41459100 |
| H | 3.14300200  | 2.18958400  | -2.07844500 |
| H | 1.87993500  | 1.60212900  | -3.17386200 |
| C | 3.21375200  | -2.41621100 | -1.43367100 |
| C | 3.70760900  | -3.60180200 | -0.70475700 |
| C | 4.99614100  | -4.10437100 | -1.14879000 |
| C | 5.71568100  | -3.48269300 | -2.12127500 |



|   |            |             |             |
|---|------------|-------------|-------------|
| C | 5.23904800 | -2.30519600 | -2.78331800 |
| C | 4.02474200 | -1.79910700 | -2.44580200 |
| C | 1.97099200 | -1.87512300 | -1.18081000 |
| H | 5.36858000 | -4.99413300 | -0.64471900 |
| H | 6.68633000 | -3.88483400 | -2.40888800 |
| H | 5.84635100 | -1.83666200 | -3.55293800 |
| H | 3.62993000 | -0.91269500 | -2.94393700 |
| H | 1.68070200 | -0.97860100 | -1.74819700 |
| O | 3.08567600 | -4.13326100 | 0.22939500  |
| N | 1.02870400 | -2.40690700 | -0.39581600 |

**SMD-M06/6-31G(d,p)/SDD**

Electronic Energy (0K) = -2915.773420

Electronic Energy (0K) + ZPE = -2914.823782

Enthalpy (298K) = -2914.763401

Free Energy (298K) = -2914.920224

**SMD-M06/6-311+G(d,p)/SDD**

Electronic Energy (0K) = -2916.34545

**TS<sub>Cl</sub>'**

Number of imaginary frequencies: 1

|   |            |             |            |
|---|------------|-------------|------------|
| C | 0.92048900 | -1.65900400 | 0.06840600 |
| C | 1.31323800 | -0.37716000 | 0.71819200 |
| C | 2.53560600 | -0.06412800 | 1.35242500 |
| C | 3.69490300 | -0.89141300 | 1.38778900 |
| C | 2.61395100 | 1.20580800  | 2.00515100 |
| C | 4.83073200 | -0.48040000 | 2.05641500 |
| H | 3.70286100 | -1.82816400 | 0.85264000 |
| C | 3.73772200 | 1.58798000  | 2.70348400 |
| H | 1.75185800 | 1.87023700  | 1.96127100 |
| C | 4.84995700 | 0.74232900  | 2.73016300 |

|    |             |             |             |
|----|-------------|-------------|-------------|
| H  | 5.71327900  | -1.11385200 | 2.05765900  |
| H  | 3.76178400  | 2.54810400  | 3.21218600  |
| H  | 5.74579900  | 1.04642100  | 3.26675200  |
| N  | -0.29080000 | -2.17346100 | 0.41441900  |
| S  | -1.24587500 | -3.15882100 | -0.64472300 |
| O  | -2.46653300 | -3.35657200 | 0.11967700  |
| O  | -1.27392400 | -2.50880100 | -1.94171800 |
| C  | -0.74248200 | -2.06349700 | 1.80407300  |
| H  | -0.09623500 | -1.35049500 | 2.32648400  |
| H  | -1.77274700 | -1.70272200 | 1.84270300  |
| Au | -0.10514600 | 1.07754700  | 0.29057300  |
| H  | -0.65430700 | -3.03064100 | 2.30954100  |
| C  | -0.39666400 | -4.69751700 | -0.76687100 |
| C  | -0.39223400 | -5.54582100 | 0.34124900  |
| C  | 0.23035100  | -5.04537800 | -1.95907300 |
| C  | 0.27040100  | -6.75824800 | 0.24471700  |
| H  | -0.90095100 | -5.26232300 | 1.26009600  |
| C  | 0.87599700  | -6.27292800 | -2.03748400 |
| H  | 0.20731300  | -4.36734600 | -2.80906100 |
| C  | 0.91299600  | -7.13829800 | -0.94122000 |
| H  | 0.29472500  | -7.42861000 | 1.10219400  |
| H  | 1.37537700  | -6.55984800 | -2.96143500 |
| C  | 1.61862800  | -8.45377900 | -1.02912300 |
| H  | 2.07275900  | -8.72571500 | -0.06979800 |
| H  | 0.91695400  | -9.25573300 | -1.29322600 |
| H  | 2.40187600  | -8.43770900 | -1.79443700 |
| C  | -1.38266800 | 2.63469300  | -0.16149700 |
| C  | -2.12729000 | 4.73250200  | -0.51421800 |
| C  | -3.13697700 | 3.88106500  | -0.82581200 |
| H  | -2.06194500 | 5.81150400  | -0.54020200 |

|   |             |             |             |
|---|-------------|-------------|-------------|
| H | -4.14376300 | 4.05686100  | -1.17931600 |
| N | -2.65636600 | 2.60140100  | -0.60649000 |
| N | -1.06372100 | 3.94758500  | -0.10193300 |
| C | 0.22777700  | 4.42747200  | 0.31016400  |
| C | 0.41003100  | 4.78192700  | 1.65557500  |
| C | 1.25707300  | 4.47070600  | -0.64086400 |
| C | 1.68612700  | 5.19799700  | 2.03971700  |
| C | 2.51385300  | 4.89733500  | -0.20483100 |
| C | 2.72637200  | 5.25850300  | 1.11927500  |
| H | 1.86855400  | 5.47442500  | 3.07662400  |
| H | 3.33691300  | 4.94520000  | -0.91621700 |
| H | 3.71276800  | 5.58804800  | 1.43895800  |
| C | -3.39600200 | 1.38127500  | -0.77851200 |
| C | -4.06231100 | 0.84985800  | 0.33437300  |
| C | -3.37371300 | 0.75895700  | -2.03454800 |
| C | -4.72020800 | -0.36951200 | 0.16014300  |
| C | -4.04950300 | -0.45632700 | -2.15493800 |
| C | -4.71232300 | -1.01565800 | -1.06970600 |
| H | -5.24371500 | -0.81900300 | 1.00264200  |
| H | -4.03853400 | -0.98193400 | -3.10795500 |
| H | -5.22155200 | -1.97027300 | -1.18154300 |
| C | -4.08642100 | 1.54332600  | 1.68117900  |
| C | -5.51597300 | 1.86866000  | 2.10697200  |
| C | -3.37305100 | 0.71164700  | 2.74445700  |
| H | -3.54693700 | 2.49749100  | 1.59248300  |
| H | -6.02868400 | 2.47706200  | 1.35167300  |
| H | -5.51609200 | 2.42734500  | 3.05083300  |
| H | -6.10637900 | 0.95648200  | 2.26219800  |
| H | -2.32415500 | 0.52708500  | 2.46920800  |
| H | -3.86285100 | -0.26150500 | 2.88391400  |

|   |             |             |             |
|---|-------------|-------------|-------------|
| H | -3.38603000 | 1.23092300  | 3.71107700  |
| C | -2.60113200 | 1.33319500  | -3.20352400 |
| C | -1.27711400 | 0.58853800  | -3.38019500 |
| C | -3.40414100 | 1.31147800  | -4.50028300 |
| H | -2.36886700 | 2.38433800  | -2.97891300 |
| H | -0.67199600 | 0.61517300  | -2.46088300 |
| H | -0.69106400 | 1.03370400  | -4.19477000 |
| H | -1.45492300 | -0.46767800 | -3.62009200 |
| H | -4.37378600 | 1.81072000  | -4.38669700 |
| H | -3.59006600 | 0.28623300  | -4.84432000 |
| H | -2.84914800 | 1.82421900  | -5.29511100 |
| C | -0.69614000 | 4.64692400  | 2.68129500  |
| C | -0.52767300 | 3.34112100  | 3.46079300  |
| C | -0.76429000 | 5.83318600  | 3.63716500  |
| H | -1.65613500 | 4.59706600  | 2.14812500  |
| H | -0.53991500 | 2.46565000  | 2.79361900  |
| H | -1.33401600 | 3.22383800  | 4.19591600  |
| H | 0.42720200  | 3.33800300  | 4.00619600  |
| H | -0.83177000 | 6.78589400  | 3.09889800  |
| H | 0.11321600  | 5.87712800  | 4.29467300  |
| H | -1.64645700 | 5.74405900  | 4.28204300  |
| C | 1.05946000  | 4.05484200  | -2.08356300 |
| C | 1.37133600  | 5.20250000  | -3.04051400 |
| C | 1.90052100  | 2.82206100  | -2.41375200 |
| H | 0.00317500  | 3.78540800  | -2.22711600 |
| H | 0.76342800  | 6.08748700  | -2.81566900 |
| H | 1.16530100  | 4.90255700  | -4.07508900 |
| H | 2.42752200  | 5.49616200  | -2.98596700 |
| H | 1.66023000  | 1.98047700  | -1.74473300 |
| H | 2.97294800  | 3.03587500  | -2.31475600 |

|   |            |             |             |
|---|------------|-------------|-------------|
| H | 1.72050600 | 2.49958700  | -3.44693400 |
| C | 3.02496500 | -3.54742600 | -1.02946300 |
| C | 2.75160800 | -3.90872300 | 0.34224500  |
| C | 3.36240800 | -5.10898900 | 0.82218500  |
| C | 4.20231000 | -5.84555300 | 0.02435800  |
| C | 4.48574500 | -5.46778600 | -1.31094300 |
| C | 3.89676800 | -4.33848600 | -1.81880600 |
| C | 2.35264200 | -2.47136800 | -1.65499700 |
| H | 3.15102200 | -5.40118900 | 1.84895800  |
| H | 4.66382900 | -6.74579400 | 0.42818100  |
| H | 5.15501700 | -6.07061900 | -1.91868600 |
| H | 4.07848100 | -4.03049100 | -2.84880500 |
| H | 2.61446400 | -2.27127300 | -2.69856900 |
| O | 2.03782200 | -3.17714600 | 1.10564100  |
| N | 1.40488400 | -1.71474500 | -1.17612000 |

**SMD-M06/6-31G(d,p)/SDD**

Electronic Energy (0K) = -2915.763736

Electronic Energy (0K) + ZPE = -2914.813256

Enthalpy (298K) = -2914.754562

Free Energy (298K) = -2914.905819

**SMD-M06/6-311+G(d,p)/SDD**

Electronic Energy (0K) = -2916.332219

**C1'**

Number of imaginary frequencies: 0

|   |            |             |            |
|---|------------|-------------|------------|
| C | 1.31810900 | -1.69848800 | 0.04786600 |
| C | 1.66743100 | -0.23572600 | 0.34193500 |
| C | 3.00197700 | 0.18777300  | 0.59531900 |
| C | 4.17499100 | -0.59048700 | 0.38279400 |
| C | 3.17331100 | 1.51388400  | 1.08812400 |

|    |             |             |             |
|----|-------------|-------------|-------------|
| C  | 5.42348800  | -0.07002400 | 0.65519500  |
| H  | 4.10881600  | -1.58469200 | -0.04019100 |
| C  | 4.42357300  | 2.01030100  | 1.39975400  |
| H  | 2.28860000  | 2.13265500  | 1.24246600  |
| C  | 5.55080500  | 1.21987200  | 1.17746700  |
| H  | 6.31068400  | -0.66685200 | 0.46306200  |
| H  | 4.52595000  | 3.01675900  | 1.79720200  |
| H  | 6.53946600  | 1.61407000  | 1.40103500  |
| N  | -0.02217100 | -1.94437900 | 0.58664500  |
| S  | -1.19391500 | -2.91598800 | -0.14526100 |
| O  | -2.37338300 | -2.75494300 | 0.69613200  |
| O  | -1.24883700 | -2.57840700 | -1.55800400 |
| C  | -0.05986300 | -1.89258800 | 2.05311400  |
| H  | 0.56078600  | -1.04994100 | 2.38371500  |
| H  | -1.08110600 | -1.70632300 | 2.38876300  |
| Au | 0.11379900  | 1.09593800  | 0.09487600  |
| H  | 0.33229000  | -2.80749200 | 2.51638800  |
| C  | -0.65837100 | -4.60056300 | 0.01462900  |
| C  | -0.73830800 | -5.22283500 | 1.26009100  |
| C  | -0.16895000 | -5.27904500 | -1.09918600 |
| C  | -0.29567300 | -6.53287700 | 1.38790500  |
| H  | -1.15818600 | -4.69782500 | 2.11488600  |
| C  | 0.25618600  | -6.59203600 | -0.95362900 |
| H  | -0.13300100 | -4.78305900 | -2.06651600 |
| C  | 0.20898200  | -7.23387600 | 0.28852200  |
| H  | -0.34929000 | -7.02657000 | 2.35665200  |
| H  | 0.64000600  | -7.13212800 | -1.81829900 |
| C  | 0.68142200  | -8.64710300 | 0.42274400  |
| H  | 0.80044700  | -8.93524500 | 1.47199500  |
| H  | -0.03154100 | -9.34424000 | -0.03575700 |

|   |             |             |             |
|---|-------------|-------------|-------------|
| H | 1.64098200  | -8.79281300 | -0.08815200 |
| C | -1.32317200 | 2.55746300  | -0.18682800 |
| C | -2.25479300 | 4.61349400  | -0.23652000 |
| C | -3.16960700 | 3.73645700  | -0.71866000 |
| H | -2.29088300 | 5.68390900  | -0.08807200 |
| H | -4.17820800 | 3.87539400  | -1.08299300 |
| N | -2.58045400 | 2.48302700  | -0.67425600 |
| N | -1.13041400 | 3.87077900  | 0.07848500  |
| C | 0.09332300  | 4.39819900  | 0.61497200  |
| C | 0.26887600  | 4.39334600  | 2.00569000  |
| C | 1.07106900  | 4.85418000  | -0.28179500 |
| C | 1.48227700  | 4.87943200  | 2.49875900  |
| C | 2.26457700  | 5.33198800  | 0.26237600  |
| C | 2.46684500  | 5.34876100  | 1.63769100  |
| H | 1.65556800  | 4.88938800  | 3.57371700  |
| H | 3.04940500  | 5.68980200  | -0.40190900 |
| H | 3.40269700  | 5.72927000  | 2.04204900  |
| C | -3.21819700 | 1.27355000  | -1.11896600 |
| C | -4.05218100 | 0.59448300  | -0.21815400 |
| C | -2.98931400 | 0.84244300  | -2.43187100 |
| C | -4.68433200 | -0.55915200 | -0.68120400 |
| C | -3.64345700 | -0.32102300 | -2.84291000 |
| C | -4.48711600 | -1.00858000 | -1.98160500 |
| H | -5.33083400 | -1.12122300 | -0.01037600 |
| H | -3.48470100 | -0.69286300 | -3.85384700 |
| H | -4.98757300 | -1.91257900 | -2.32196200 |
| C | -4.19930500 | 1.04292900  | 1.22105700  |
| C | -5.61209200 | 0.86446800  | 1.76455000  |
| C | -3.19282800 | 0.29297100  | 2.09721100  |
| H | -3.95821200 | 2.11500800  | 1.27418800  |

|   |             |             |             |
|---|-------------|-------------|-------------|
| H | -6.36108400 | 1.34179400  | 1.12147300  |
| H | -5.68835200 | 1.31068300  | 2.76330900  |
| H | -5.87767400 | -0.19562800 | 1.86470400  |
| H | -2.16203600 | 0.43316000  | 1.73664700  |
| H | -3.40192100 | -0.78523500 | 2.07854600  |
| H | -3.24953400 | 0.64093100  | 3.13719600  |
| C | -2.05280700 | 1.56392100  | -3.37858400 |
| C | -0.79243200 | 0.73245800  | -3.61571900 |
| C | -2.73418000 | 1.91009800  | -4.69940100 |
| H | -1.74339700 | 2.51017400  | -2.91004000 |
| H | -0.26910000 | 0.51797900  | -2.67206700 |
| H | -0.10033500 | 1.26239400  | -4.28308300 |
| H | -1.03959100 | -0.23021300 | -4.08369800 |
| H | -3.64581600 | 2.49887500  | -4.54039300 |
| H | -3.00955600 | 1.00770700  | -5.26013000 |
| H | -2.05787800 | 2.49597300  | -5.33380200 |
| C | -0.77445900 | 3.84948700  | 2.95987300  |
| C | -0.27665300 | 2.56279800  | 3.61859600  |
| C | -1.16980400 | 4.88197200  | 4.01170300  |
| H | -1.67830100 | 3.60191800  | 2.38392400  |
| H | -0.04044000 | 1.79297500  | 2.86750400  |
| H | -1.03760100 | 2.15730600  | 4.29721200  |
| H | 0.63142600  | 2.74908000  | 4.20809700  |
| H | -1.52481900 | 5.81074600  | 3.54903000  |
| H | -0.32623100 | 5.13264900  | 4.66750200  |
| H | -1.97371800 | 4.48938100  | 4.64596000  |
| C | 0.89381700  | 4.77093300  | -1.78368400 |
| C | 1.25495600  | 6.07599100  | -2.48571600 |
| C | 1.71711700  | 3.61014000  | -2.34430500 |
| H | -0.16436000 | 4.56197000  | -1.99703700 |



|   |            |             |             |
|---|------------|-------------|-------------|
| H | 0.69393400 | 6.92484100  | -2.07706900 |
| H | 1.02850600 | 6.00292300  | -3.55614600 |
| H | 2.32481900 | 6.30265800  | -2.39480600 |
| H | 1.43445100 | 2.65296400  | -1.87977600 |
| H | 2.78872300 | 3.76954200  | -2.15953400 |
| H | 1.57129100 | 3.52168000  | -3.42847100 |
| C | 2.66010100 | -3.72266600 | -1.32753200 |
| C | 2.66748500 | -3.69423400 | 0.07220100  |
| C | 3.20327800 | -4.74454900 | 0.80585900  |
| C | 3.73812800 | -5.82825000 | 0.11727100  |
| C | 3.74836600 | -5.87131600 | -1.28123600 |
| C | 3.21047400 | -4.81718900 | -2.00212300 |
| C | 2.04422300 | -2.59888000 | -1.98658700 |
| H | 3.19781900 | -4.69958100 | 1.89198400  |
| H | 4.15856000 | -6.65691600 | 0.68267500  |
| H | 4.17562000 | -6.72785600 | -1.79547600 |
| H | 3.19712700 | -4.82585800 | -3.09098900 |
| H | 2.11677700 | -2.53028200 | -3.07596700 |
| O | 2.22262200 | -2.59165700 | 0.72468800  |
| N | 1.38377000 | -1.67578400 | -1.38186900 |

**SMD-M06/6-31G(d,p)/SDD**

Electronic Energy (0K) = -2915.788908

Electronic Energy (0K) + ZPE = -2914.837158

Enthalpy (298K) = -2914.778356

Free Energy (298K) = -2914.930151

**SMD-M06/6-311+G(d,p)/SDD**

Electronic Energy (0K) = -2916.353689
